# Supplementary material for: Synthesis and solvodynamic diameter measurements of closely related mannodendrimers for the study of multivalent carbohydrate–protein interactions
Source: Beilstein J Org Chem. 2014 Jul 4;10:1524–35. doi: 10.3762/bjoc.10.157 (PMC4144466; doi:10.3762/bjoc.10.157)
Supplement: File 1 — Experimental procedures, characterization data, NMR, IR and mass spectra and NMR diffusion experiments. [file Beilstein_J_Org_Chem-10-1524-s001.pdf]

**Supporting Information**

**for**

**Synthesis and solvodynamic diameter measurements of closely related mannodendrimers for the study of multivalent carbohydrate–protein interactions**

Yoann M. Chabre, Alex Papadopoulos, Alexandre A. Arnold and René Roy\*

Address: Pharmaqam, Department of Chemistry, Université du Québec à Montréal, P. O. Box 8888,  
Succ. Centre-ville, Montréal, Québec, Canada H3C 3P8

Email: René Roy\* - [roy.rene@uqam.ca](mailto:roy.rene@uqam.ca)

\*Corresponding author

**Experimental procedures, characterization data, NMR, IR and mass spectra and  
NMR diffusion experiments**

**Contents**

|                                     |     |
|-------------------------------------|-----|
| 1. Experimental procedures and data | S2  |
| 2. NMR, IR, and mass spectra        | S11 |
| 3. NMR diffusion experiments        | S49 |

## Experimental procedures and data

All reactions in organic medium were performed in standard oven-dried glassware under an inert atmosphere of nitrogen using freshly distilled solvents.  $\text{CH}_2\text{Cl}_2$  was distilled from  $\text{CaH}_2$  and DMF from ninhydrin, and kept over molecular sieves. Solvents and reagents were deoxygenated when necessary by purging with nitrogen. Water used for lyophilization of final dendrimers was nanopure grade, purified through Barnstead NANOPure II Filter with Barnstead MegOhm-CM Sybron meter. All reagents were used as supplied without prior purification unless otherwise stated, and obtained from Sigma–Aldrich Chemical Co. Ltd. Reactions were monitored by analytical thin layer chromatography using silica gel 60 F254 precoated plates (E. Merck) and compounds were visualized by 254 nm light, a mixture of iodine/silica gel and/or mixture of ceric ammonium molybdate solution (100 mL  $\text{H}_2\text{SO}_4$ , 900 mL  $\text{H}_2\text{O}$ , 25 g  $(\text{NH}_4)_6\text{Mo}_7\text{O}_{24}\cdot\text{H}_2\text{O}$ , 10 g  $\text{Ce}(\text{SO}_4)_2$ ) and subsequent development by gentle warming with a heat-gun. Purifications were performed by flash column chromatography using silica gel from Silicycle (60 Å, 40–63  $\mu\text{m}$ ) with the indicated eluent.

## NMR, IR spectroscopies and MS spectrometry

$^1\text{H}$  NMR and  $^{13}\text{C}$  NMR spectra were recorded at 300 or 600 MHz and 75 or 150 MHz, respectively, on a Bruker spectrometer (300 MHz) and Varian spectrometer (600 MHz). All NMR spectra were measured at 25 °C in indicated deuterated solvents. Proton and carbon chemical shifts ( $\delta$ ) are reported in ppm and coupling constants ( $J$ ) are reported in Hertz (Hz). The resonance multiplicity in the  $^1\text{H}$  NMR spectra are described as “s” (singlet), “d” (doublet), “t” (triplet), and “m” (multiplet) and broad resonances are indicated by “br”. Residual protic solvent of  $\text{CDCl}_3$  ( $^1\text{H}$ ,  $\delta$  7.27 ppm;  $^{13}\text{C}$ ,  $\delta$  77.0 ppm (central resonance of the triplet)),  $\text{D}_2\text{O}$  ( $^1\text{H}$ ,  $\delta$  4.79 ppm and 30.89 ppm for  $\text{CH}_3$  of acetone for  $^{13}\text{C}$  spectra of de-*O*-acetylated compounds),  $\text{MeOD}$  ( $^1\text{H}$ ,  $\delta$  3.31 ppm and  $^{13}\text{C}$ ,  $\delta$  49.0 ppm. 2D Homonuclear correlation  $^1\text{H}$ - $^1\text{H}$  COSY together with 2D heteronuclear correlation  $^1\text{H}$ - $^{13}\text{C}$  HSQC experiments were used to confirm NMR peak assignments.

Fourier transform infrared (FTIR) spectra were obtained with Thermo-scientific, Nicolet model 6700 equipped with ATR. The absorptions are given in wavenumbers ( $\text{cm}^{-1}$ ). The intensity of the bands is described as s (strong), m (medium) or w (weak). Melting points were measured on an Electrothermal MEL-TEMP apparatus and are uncorrected.

Accurate mass measurements (HRMS) were performed on a LC–MSD-ToF instrument from Agilent Technologies in positive electrospray (ES) mode. Low-resolution mass spectra were performed on the same apparatus or on a LCQ Advantage ion trap instrument from Thermo Fisher Scientific in positive electrospray mode (Mass Spectrometry Laboratory (Université de Montréal), or Plateforme analytique pour molécules organiques (Université du Québec à Montréal), Québec, Canada). Either protonated molecular ions  $[\text{M} + n\text{H}]^{n+}$  or adducts  $[\text{M} + n\text{X}]^{n+}$  ( $\text{X} = \text{Na}, \text{K}, \text{NH}_4$ ) were used for empirical formula confirmation.

## General procedures

### **Procedure A: multiple CuAAC couplings on polypropargylated cores**

To a solution of polypropargylated core (1.00 equiv) and complementary azido synthon (1.25 equiv/propargyl) in a THF/H<sub>2</sub>O mixture (1:1) were added sodium ascorbate (0.30 equiv/propargyl) and CuSO<sub>4</sub>·5H<sub>2</sub>O (0.30 equiv/propargyl). The reaction mixture was stirred at 50 °C for 3 h then at room temperature for an additional 16 h period. EtOAc (10 mL) was added and the resulting solution was poured in a separatory funnel containing 25 mL of EtOAc and 30 mL of a saturated aqueous solution of NH<sub>4</sub>Cl. Organics were washed with (2 × 25 mL) of saturated NH<sub>4</sub>Cl<sub>aq</sub>, water (2 × 20 mL) and brine (10 mL). The organic phase was then dried over MgSO<sub>4</sub> and concentrated under reduced pressure. Column chromatography on silica (DCM/MeOH 100:0 to 90:10) afforded the desired glycocluster.

### **Procedure B: Zemplén de-*O*-acetylation procedure for insoluble derivatives**

The acetylated compound was dissolved in anhydrous MeOH and a solution of sodium methoxide (1 M in MeOH, 5 µL every 20 minutes until precipitation) was added. An additional 100 µL was then injected and the heterogeneous reaction mixture was stirred at room temperature for 24 h. The solvent was then removed with a Pasteur pipette and a mixture of anhydrous MeOH/DCM (4:1, 5 mL) was added to the residual white foam. A vigorous agitation was maintained for an additional 15 min period. After removal of the solvents with a Pasteur pipette, the residue was dissolved in H<sub>2</sub>O (3 mL), and the pH was adjusted to 6–7 with addition of ion-exchange resin (Amberlite IR 120 H<sup>+</sup>). After filtration, the solvent was removed under vacuum with rotary evaporator, lyophilized to yield the fully deprotected glycocluster.

**Synthesis of peracetylated trivalent derivative (4):** Derivative **4** was synthesized according to **Procedure A** with tripropargylated core **2** (15.4 mg, 47.9 µmol, 1.00 equiv), mannoside **3** (75.0 mg, 180 µmol, 3.75 equiv), sodium ascorbate (8.5 mg, 43 µmol, 0.90 equiv) and CuSO<sub>4</sub>·5H<sub>2</sub>O (10.8 mg, 43.1 µmol, 0.90 equiv) in a THF/H<sub>2</sub>O mixture (4 mL, 1:1). Column chromatography on silica (DCM/MeOH 98:2 to 94:6) afforded the desired compound **4** (42.0 mg, 26.8 µmol, 56%) as a white solid.

**R<sub>f</sub>** = 0.16 (94:6 DCM/MeOH); **m.p.** = 103–106°C (*not corrected*). **<sup>1</sup>H NMR (300 MHz, CDCl<sub>3</sub>)** δ (ppm) 8.21 (m, 6H, CH<sub>ar</sub> + NH), 7.74 (s, 3H, CH<sub>triazole</sub>), 5.23–5.17 (m, 9H, H<sub>2</sub>, H<sub>3</sub>, H<sub>4</sub>), 4.81 (s<sub>app</sub>, 3H, H<sub>1</sub>), 4.67–4.60 (m, 12H, HNCH<sub>2</sub>C<sub>triazole</sub> + N<sub>triazole</sub>CH<sub>2</sub>), 4.21–3.89 (m, 12H, OCH<sub>2</sub> + H<sub>6</sub>), 3.62–3.60 (m, 3H, H<sub>5</sub>), 2.11, 2.08, 2.01, 1.96 (4s, 36H, COCH<sub>3</sub>). **<sup>13</sup>C{<sup>1</sup>H} NMR (75 MHz, CDCl<sub>3</sub>)** δ (ppm) 170.7, 170.1, 170.0, 169.7 (COCH<sub>3</sub>), 165.9 (CONH), 145.0 (C<sub>triazole</sub>), 134.6 (C<sub>arom</sub>), 128.5 (CH<sub>arom</sub>), 123.4 (CH<sub>triazole</sub>), 97.3 (C<sub>1</sub>), 69.2 (C<sub>2</sub>), 68.9 (C<sub>3</sub>), 68.8 (C<sub>5</sub>), 66.1 (C<sub>6</sub>), 65.7 (C<sub>4</sub>), 62.2 (OCH<sub>2</sub>), 49.7 (CH<sub>2</sub>N<sub>triazole</sub>), 35.5 (HNCH<sub>2</sub>C<sub>triazole</sub>), 20.8, 20.7, 20.6, 20.6 (COCH<sub>3</sub>). **HRMS** (<sup>+</sup>TOF-HRMS) *m/z*: calculated for C<sub>66</sub>H<sub>84</sub>N<sub>12</sub>O<sub>33</sub> [M+H]<sup>+</sup>: 1573.5337, found: 1573.5327 (Δ = −0.88 ppm); [M+Na]<sup>+</sup>: 1595.5156, found: 1595.5151 (Δ = −0.29 ppm).

**Synthesis of trivalent derivative (5):** A solution of sodium methoxide (1 M in MeOH, 50  $\mu$ L) was added to a solution of acetylated precursor **4** (30.0 mg, 19.1  $\mu$ mol) in MeOH (2.5 mL). The reaction mixture was stirred at room temperature for 24 h. The pH was adjusted to 6–7 with addition of ion-exchange resin (Amberlite IR 120 H<sup>+</sup>). After filtration, the solvent was removed under vacuum with rotary evaporator and the residue was lyophilized to furnish desired de-*O*-acetylated compound **5** (19.0 mg, 17.9  $\mu$ mol, 94%) as a white solid.

**<sup>1</sup>H NMR (300 MHz, D<sub>2</sub>O)**  $\delta$  (ppm) 8.27 (s, 3H, CH<sub>ar</sub>), 8.01 (s, 3H, CH<sub>triazole</sub>), 4.74 (m, 3H, H<sub>1</sub>), 4.63–4.59 (m, 12H, HNCH<sub>2</sub>C<sub>triazole</sub>+ N<sub>triazole</sub>CH<sub>2</sub>), 4.05–4.01 (m, 3H, CHHCH<sub>2</sub>N), 3.88–3.79 (m, 6H, CHHCH<sub>2</sub>N + H<sub>2</sub>), 3.63–3.47 (m, 12H, H<sub>6</sub> + H<sub>4</sub> + H<sub>3</sub>), 2.90–2.86 (m, 3H, H<sub>5</sub>). **<sup>13</sup>C{<sup>1</sup>H} NMR (75 MHz, D<sub>2</sub>O)**  $\delta$  (ppm) 168.4 (CONH), 144.6 (C<sub>triazole</sub>), 134.5 (C<sub>arom</sub>), 129.3 (CH<sub>arom</sub>), 124.7 (CH<sub>triazole</sub>), 99.5 (C<sub>1</sub>), 72.8 (C<sub>5</sub>), 70.5 (C<sub>3</sub>), 69.9 (C<sub>2</sub>), 66.4 (C<sub>4</sub>), 65.5 (OCH<sub>2</sub>), 60.7 (C<sub>6</sub>), 50.1 (CH<sub>2</sub>N<sub>triazole</sub>), 35.1 (HNCH<sub>2</sub>C<sub>triazole</sub>). **HRMS** (<sup>+</sup>TOF-HRMS) *m/z*: calculated for C<sub>42</sub>H<sub>60</sub>N<sub>12</sub>O<sub>21</sub> [M+Na]<sup>+</sup>: 1091.3888, found: 1091.3888 ( $\Delta$  = –0.11 ppm).

**Synthesis of peracetylated trivalent derivative (8):** To a solution of triazido core **6** (50.0 mg, 109  $\mu$ mol, 1.00 equiv) and mannoside **7** (158 mg, 409  $\mu$ mol, 3.75 equiv) in a THF/H<sub>2</sub>O mixture (6 mL, 1:1) were added sodium ascorbate (19.4 mg, 98.1  $\mu$ mol, 0.90 equiv) and CuSO<sub>4</sub>·5H<sub>2</sub>O (24.5 mg, 98.1  $\mu$ mol, 0.90 equiv). The reaction mixture was stirred at 50 °C for 3 h then at room temperature for an additional 16 h period. EtOAc (10 mL) was added and the resulting solution was poured in a separatory funnel containing 35 mL of EtOAc and 30 mL of a saturated aqueous solution of NH<sub>4</sub>Cl. Organics were washed with (2  $\times$  25 mL) of saturated NH<sub>4</sub>Cl<sub>aq</sub>, water (2  $\times$  20 mL) and brine (10 mL). The organic phase was then dried over MgSO<sub>4</sub> and concentrated under reduced pressure. Column chromatography on silica (DCM/MeOH 98:2 to 94:6) afforded the desired compound **8** (138 mg, 86.0  $\mu$ mol, 79%) as a viscous oil.

**R<sub>f</sub>** = 0.34 (95:5 DCM/MeOH). **<sup>1</sup>H NMR (600 MHz, CDCl<sub>3</sub>)**  $\delta$  (ppm) 8.27 (s, 3H, CH<sub>ar</sub>), 7.79 (s, 3H, CH<sub>triazole</sub>), 7.72 (t, *J* = 5.3 Hz, 3H, NH), 5.29–5.19 (m, 9H, H<sub>2</sub>, H<sub>3</sub>, H<sub>4</sub>), 4.92 (s<sub>app</sub>, 3H, H<sub>1</sub>), 4.77–4.62 (2 $\times$ d, *J* = 12.4 Hz, 6H, OCH<sub>2</sub>), 4.54 (t, *J* = 6.4 Hz, 6H, N<sub>triazole</sub>CH<sub>2</sub>), 4.28 (dd, *J* = 12.4 Hz, *J* = 5.4 Hz, 3H, H<sub>6b</sub>), 4.11–4.03 (m, 6H, H<sub>5</sub> + H<sub>6a</sub>), 3.55 (m, 6H, NHCH<sub>2</sub>), 2.28 (m, 6H, CH<sub>2</sub>CH<sub>2</sub>CH<sub>2</sub>), 2.12, 2.10, 2.02, 1.96 (4s, 36H, COCH<sub>3</sub>). **<sup>13</sup>C{<sup>1</sup>H} NMR (150 MHz, CDCl<sub>3</sub>)**  $\delta$  (ppm) 170.8, 170.1, 170.0, 169.7 (COCH<sub>3</sub>), 166.1 (CONH), 143.5 (C<sub>triazole</sub>), 134.9 (C<sub>arom</sub>), 128.5 (CH<sub>arom</sub>), 123.9 (CH<sub>triazole</sub>), 96.7 (C<sub>1</sub>), 69.3 (C<sub>2</sub>), 69.0 (C<sub>3</sub>), 68.7 (C<sub>5</sub>), 65.9 (C<sub>6</sub>), 62.3 (C<sub>4</sub>), 60.7 (OCH<sub>2</sub>), 48.3 (CH<sub>2</sub>N<sub>triazole</sub>), 37.5 (NHCH<sub>2</sub>), 29.9 (CH<sub>2</sub>CH<sub>2</sub>CH<sub>2</sub>), 20.9, 20.8, 20.7, 20.7 (COCH<sub>3</sub>). **MS** (<sup>+</sup>TOF-MS) *m/z*: calculated for C<sub>69</sub>H<sub>90</sub>N<sub>12</sub>O<sub>33</sub> [M+H]<sup>+</sup>: 1615.6, found: 1615.6.

**Synthesis of trivalent derivative (9):** Derivative **9** was synthesized according to **Procedure B** with compound **8** (120.0 mg, 74.3  $\mu$ mol) previously dissolved in anhydrous MeOH (4 mL). Deprotected hexamer **9** was obtained as a white solid (78.0 mg, 70.6  $\mu$ mol) in a 95% yield.

**$^1\text{H}$  NMR (300 MHz,  $\text{D}_2\text{O}$ )**  $\delta$  (ppm) 8.03 (s, 3H,  $\text{CH}_{\text{ar}}$ ), 8.00 (s, 3H,  $\text{CH}_{\text{triazole}}$ ), 4.85 (m, 3H,  $H_1$ ), 4.68–4.49 (m, 12H,  $\text{OCH}_2\text{C}_{\text{triazole}} + \text{N}_{\text{triazole}}\text{CH}_2$ ), 3.80–3.55 (m, 18H,  $H_2 + H_6 + H_4 + H_3 + H_5$ ), 3.40 (m, 6H,  $\text{OCNHCH}_2$ ), 2.24 (m, 6H,  $\text{CH}_2\text{CH}_2\text{CH}_2$ ).  **$^{13}\text{C}\{^1\text{H}\}$  NMR (75 MHz,  $\text{CDCl}_3$ )**  $\delta$  (ppm) 168.6 (CONH), 144.2 ( $\text{C}_{\text{triazole}}$ ), 135.0 ( $\text{C}_{\text{arom}}$ ), 129.3 ( $\text{CH}_{\text{arom}}$ ), 125.8 ( $\text{CH}_{\text{triazole}}$ ), 100.0 ( $\text{C}_1$ ), 73.6 ( $\text{C}_5$ ), 71.1 ( $\text{C}_3$ ), 70.6 ( $\text{C}_2$ ), 67.3 ( $\text{C}_4$ ), 61.5 ( $\text{C}_6$ ), 60.7 ( $\text{OCH}_2$ ), 49.1 ( $\text{CH}_2\text{N}_{\text{triazole}}$ ), 38.1 ( $\text{OCHNCH}_2$ ), 29.3 ( $\text{CH}_2\text{CH}_2\text{CH}_2$ ). **HRMS** ( $^+\text{TOF-HRMS}$ )  $m/z$ : calculated for  $\text{C}_{45}\text{H}_{66}\text{N}_{12}\text{O}_{21}$   $[\text{M}+\text{H}]^+$ : 1111.4538, found: 1111.4533 ( $\Delta = -0.52$  ppm);  $[\text{M}+\text{Na}]^+$ : 1133.4358, found: 1133.4347 ( $\Delta = -0.93$  ppm).

**Synthesis of peracetylated nonavalent derivative (11):** Derivative **11** was synthesized according to **Procedure A** with nonapropargylated core **10** (20.0 mg, 23.2  $\mu$ mol, 1.00 equiv), mannoside **3** (108.9 mg, 261.0  $\mu$ mol, 11.25 equiv), sodium ascorbate (12.4 mg, 62.7  $\mu$ mol, 2.70 equiv), and  $\text{CuSO}_4 \cdot 5\text{H}_2\text{O}$  (15.7 mg, 62.7  $\mu$ mol, 2.70 equiv) in a THF/ $\text{H}_2\text{O}$  mixture (3 mL, 1:1). Column chromatography on silica (DCM/MeOH 98:2 to 94:6) afforded the desired compound **11** (88.0 mg, 19.1  $\mu$ mol, 83%) as a colorless oil.

$R_f = 0.19$  (95:5 DCM/MeOH).  **$^1\text{H}$  NMR (300 MHz,  $\text{CDCl}_3$ )**  $\delta$  (ppm) 8.18 (br s, 3H,  $\text{CH}_{\text{ar}}$ ), 7.77 (s, 9H,  $\text{CH}_{\text{triazole}}$ ), 7.17 (m, 3H, NH), 5.28–5.15 (m, 27H,  $H_2$ ,  $H_3$ ,  $H_4$ ), 4.80 (br s, 9H,  $H_1$ ), 4.64–4.53 (m, 36H,  $\text{OCH}_2\text{C}_{\text{triazole}} + \text{N}_{\text{triazole}}\text{CH}_2$ ), 4.20–3.98 (m, 27H,  $\text{OCH}_2\text{CH}_2 + H_{6a}$ ), 3.90–3.85 (m, 27H,  $H_{6b} + \text{NHC}_q\text{CH}_2\text{O}$ ), 3.59 (m, 9H,  $H_5$ ), 2.09, 2.05, 2.01, 1.96 (4s, 108H,  $\text{COCH}_3$ ).  **$^{13}\text{C}\{^1\text{H}\}$  NMR (75 MHz,  $\text{CDCl}_3$ )**  $\delta$  (ppm) 170.6, 169.9, 169.6, 169.7 ( $\text{COCH}_3$ ), 166.3 (CONH), 144.8 ( $\text{C}_{\text{triazole}}$ ), 135.5 ( $\text{C}_{\text{arom}}$ ), 128.5 ( $\text{CH}_{\text{arom}}$ ), 124.0 ( $\text{CH}_{\text{triazole}}$ ), 97.3 ( $\text{C}_1$ ), 69.0 ( $\text{C}_2$ ), 68.8 ( $\text{C}_3$ ), 68.7 ( $\text{C}_5$ ), 68.4 ( $\text{NHC}_q\text{CH}_2\text{O}$ ), 66.1 ( $\text{C}_6$ ), 65.5 ( $\text{C}_4$ ), 64.4 ( $\text{OCH}_2\text{C}_{\text{triazole}}$ ), 62.2 ( $\text{OCH}_2\text{CH}_2$ ), 60.5 ( $\text{C}_q$ ), 49.5 ( $\text{CH}_2\text{N}_{\text{triazole}}$ ), 20.8, 20.7, 20.6, 20.6 ( $\text{COCH}_3$ ). **HRMS** ( $^+\text{ESI-MS}$ )  $m/z$ : calculated for  $\text{C}_{192}\text{H}_{258}\text{N}_{30}\text{O}_{102}$   $[\text{M}+2\text{H}]^{2+}$ : 2308.8035, found: 2308.7995 ( $\Delta = -1.73$  ppm).

**Synthesis of de-*O*-acetylated nonavalent derivative (12):** A solution of sodium methoxide (1 M in MeOH, 150  $\mu$ L) was added to a solution of acetylated precursor **11** (70.0 mg, 15.2  $\mu$ mol) in MeOH (2.5 mL). The reaction mixture was stirred at room temperature for 24 h. The pH was adjusted to 7 with addition of ion-exchange resin (Amberlite IR 120  $\text{H}^+$ ). After filtration, the solvent was removed under vacuum with rotary evaporator and the residue was lyophilized to furnish desired de-*O*-acetylated compound **12** (47.0 mg, 15.2  $\mu$ mol, 99%) as a white solid.

**$^1\text{H}$  NMR (300 MHz,  $\text{D}_2\text{O}$ )**  $\delta$  (ppm) 8.02 (m, 12H,  $\text{CH}_{\text{ar}} + \text{CH}_{\text{triazole}}$ ), 4.74 (m, 9H,  $H_1$ ), 4.62–4.56 (m, 36H,  $\text{OCH}_2\text{C}_{\text{triazole}} + \text{N}_{\text{triazole}}\text{CH}_2$ ), 4.05–4.01 (m, 9H,  $\text{OCHHCH}_2\text{N}$ ), 3.89–3.78 (m, 36H,  $\text{OCHHCH}_2\text{N} + H_2 + \text{NHC}_q\text{CH}_2\text{O}$ ), 3.71–3.53 (m, 36H,  $H_6 + H_4 + H_3$ ), 3.02 (m, 9H,  $H_5$ ).  **$^{13}\text{C}\{^1\text{H}\}$  NMR (75 MHz,  $\text{D}_2\text{O}$ )**  $\delta$  (ppm)

169.0 (CONH), 144.7 ( $C_{\text{triazole}}$ ), 135.8 ( $C_{\text{arom}}$ ), 129.7 ( $CH_{\text{arom}}$ ), 126.1 ( $CH_{\text{triazole}}$ ), 100.2 ( $C_1$ ), 73.4 ( $C_5$ ), 71.1 ( $C_3$ ), 70.5 ( $C_2$ ), 67.9 ( $NHC_qCH_2O$ ), 67.0 ( $C_4$ ), 66.1 ( $OCH_2CH_2N$ ), 64.2 ( $OCH_2C_{\text{triazole}}$ ), 61.4 ( $C_q$ ), 61.3 ( $C_6$ ), 50.7 ( $CH_2N_{\text{triazole}}$ ). **HRMS** ( $^+TOF$ -HRMS)  $m/z$ : calculated for  $C_{120}H_{186}N_{30}O_{66}$   $[M+2H]^{2+}$ : 1552.6132, found: 1552.6119 ( $\Delta = -0.08$  ppm).

**Synthesis of nonapropargylated derivative (14):** To a solution of phloroglucinol (**13**, 10.0 mg, 79.3  $\mu\text{mol}$ , 1.00 equiv) in anhydrous DMF (3 mL) was added under nitrogen anhydrous  $K_2CO_3$  (previously heated at 250 °C under vacuum, 39.5 mg, 285  $\mu\text{mol}$ , 3.60 equiv). After 10 min of vigorous stirring, tripropargylated synthon **14** (93.0 mg, 285  $\mu\text{mol}$ , 3.60 equiv) was added into the solution under inert atmosphere and the reaction mixture was allowed to stir at 65 °C for 39 h. In the end, the dark-brown heterogeneous reaction was poured in 30 mL of EtOAc and organics were washed with a saturated aqueous solution of  $NH_4Cl$  ( $2 \times 30$  mL) then water ( $2 \times 20$  mL) and brine (10 mL). The organic phase was then dried over  $MgSO_4$  and concentrated under reduced pressure. Column chromatography on silica (EtOAc/hexane 40:60 to 50:50) afforded the desired compound **15** (32.0 mg, 33.8  $\mu\text{mol}$ , 43%) as a colorless oil.

$R_f = 0.27$  (1:1 EtOAc/Hexane).  **$^1H$  NMR (300 MHz,  $CDCl_3$ )**  $\delta$  (ppm) 6.85 (s, 3H,  $NH$ ), 6.17 (s, 3H,  $CH_{\text{ar}}$ ), 4.36 (s, 6H,  $OCH_2CONH$ ), 4.16 (m, 18H,  $OCH_2C\equiv CH$ ), 3.87 (br s, 18H,  $HNC_qCH_2O$ ), 2.48 (m, 9H,  $OCH_2C\equiv CH$ ).  **$^{13}C\{^1H\}$  NMR (75 MHz,  $CDCl_3$ )**  $\delta$  (ppm) 167.3 (CONH), 159.0 ( $C_{\text{ar}}OCH_2$ ), 95.8 ( $CH_{\text{ar}}$ ), 79.4 ( $OCH_2C\equiv CH$ ), 74.9 ( $OCH_2C\equiv CH$ ), 68.3 ( $HNC_qCH_2O$ ), 67.5 ( $OCH_2CONH$ ), 59.2 ( $C_q$ ), 58.6 ( $OCH_2C\equiv CH$ ). **HRMS** ( $^+TOF$ -HRMS)  $m/z$ : calculated for  $C_{51}H_{57}N_3O_{15}$   $[M+H]^+$ : 952.3862, found: 952.3843 ( $\Delta = -2.10$  ppm);  $[M+Na]^+$ : 974.3682, found: 974.3662 ( $\Delta = -2.05$  ppm).

**Synthesis of peracetylated derivative (16):** **16** was synthesized according to **Procedure A** with nonapropargylated core **15** (20.0 mg, 21.0  $\mu\text{mol}$ , 1.00 equiv), mannoside **3** (98.6 mg, 236.0  $\mu\text{mol}$ , 11.25 equiv), sodium ascorbate (11.2 mg, 56.7  $\mu\text{mol}$ , 2.70 equiv), and  $CuSO_4 \cdot 5H_2O$  (14.2 mg, 56.7  $\mu\text{mol}$ , 2.70 equiv) in a THF/ $H_2O$  mixture (3 mL, 1:1). Column chromatography on silica (DCM/MeOH 98:2 to 94:6) afforded the desired compound **16** (86.0 mg, 18.3  $\mu\text{mol}$ , 87%) as a colorless oil.

$R_f = 0.24$  (93:7 DCM/MeOH).  **$^1H$  NMR (300 MHz,  $CDCl_3$ )**  $\delta$  (ppm) 7.70 (br s, 9H,  $CH_{\text{triazole}}$ ), 7.05 (br s, 3H,  $NH$ ), 6.22 (br s, 3H,  $CH_{\text{ar}}$ ), 5.26–5.17 (m, 27H,  $H_2$ ,  $H_3$ ,  $H_4$ ), 4.79 (br s, 9H,  $H_1$ ), 4.60 (br s, 36H,  $OCH_2C_{\text{triazole}} + N_{\text{triazole}}CH_2$ ), 4.18 (br s, 6H,  $OCH_2CONH$ ), 4.16–3.91 (m, 27H,  $OCH_2CH_2 + H_{6a}$ ), 3.90–3.84 (m, 27H,  $H_{6b} + NHC_qCH_2O$ ), 3.60 (m, 9H,  $H_5$ ), 2.11, 2.07, 2.02, 1.96 (4s, 108H,  $COCH_3$ ).  **$^{13}C\{^1H\}$  NMR (75 MHz,  $CDCl_3$ )**  $\delta$  (ppm) 170.5, 169.8, 169.8, 169.5, ( $COCH_3$ ), 167.5 (CONH), 158.9 ( $C_{\text{ar}}OCH_2$ ), 144.6 ( $C_{\text{triazole}}$ ), 123.9 ( $CH_{\text{triazole}}$ ), 97.3 ( $C_1$ ), 95.4 ( $CH_{\text{ar}}$ ), 69.0 ( $C_2$ ), 68.8 ( $C_3$ ), 68.7 ( $C_5$ ), 68.5 ( $NHC_qCH_2O$ ), 67.2 ( $OCH_2CONH$ ), 66.1 ( $C_6$ ), 65.5 ( $C_4$ ), 64.3 ( $OCH_2C_{\text{triazole}}$ ), 62.0 ( $OCH_2CH_2$ ), 59.6 ( $C_q$ ), 49.5 ( $CH_2N_{\text{triazole}}$ ),

20.7, 20.6, 20.6, 20.6 (COCH<sub>3</sub>). **HRMS** (<sup>+</sup>TOF-HRMS) m/z: calculated for C<sub>195</sub>H<sub>264</sub>N<sub>30</sub>O<sub>105</sub> [M+3H]<sup>3+</sup>: 1569.5486, found: 1569.5458 (Δ = -1.82 ppm); [M+2H]<sup>2+</sup>: 2353.8193, found: 2353.8088 (Δ = -4.48 ppm).

**Synthesis of de-O-acetylated nonavalent derivative (17):** Derivative **17** was synthesized according to **Procedure B** with compound **16** (45.0 mg, 9.56 μmol) previously dissolved in anhydrous MeOH (3 mL). Deprotected nonamer **17** was obtained as a white solid (27.0 mg, 8.45 μmol) in a 90% yield.

**<sup>1</sup>H NMR (300 MHz, D<sub>2</sub>O)** δ (ppm) 7.97 (m, 9H, CH<sub>triazole</sub>), 6.15 (s, 3H, CH<sub>ar</sub>), 4.77 (s, 9H, H<sub>1</sub>), 4.61–4.46 (m, 42H, OCH<sub>2</sub>C<sub>triazole</sub> + N<sub>triazole</sub>CH<sub>2</sub> + OCH<sub>2</sub>CONH), 4.06–4.01 (m, 9H, OCHHCH<sub>2</sub>N), 3.90–3.56 (m, 72H, CHHCH<sub>2</sub>N + H<sub>2</sub> + NHC<sub>q</sub>CH<sub>2</sub>O + H<sub>6</sub> + H<sub>4</sub> + H<sub>3</sub>), 3.06 (m, 9H, H<sub>5</sub>). **<sup>13</sup>C{<sup>1</sup>H} NMR (75 MHz, D<sub>2</sub>O)** δ (ppm) 170.5 (CONH), 159.7 (C<sub>ar</sub>OCH<sub>2</sub>), 144.7 (C<sub>triazole</sub>), 126.0 (CH<sub>triazole</sub>), 100.2 (C<sub>1</sub>), 96.1 (CH<sub>ar</sub>), 73.4 (C<sub>5</sub>), 71.1 (C<sub>3</sub>), 70.6 (C<sub>2</sub>), 68.4 (NHC<sub>q</sub>CH<sub>2</sub>O), 67.5 (OCH<sub>2</sub>CONH), 67.0 (C<sub>4</sub>), 66.1 (OCH<sub>2</sub>CH<sub>2</sub>N), 64.2 (OCH<sub>2</sub>C<sub>triazole</sub>), 61.3 (C<sub>6</sub>), 60.5 (C<sub>q</sub>), 50.7 (CH<sub>2</sub>N<sub>triazole</sub>). **HRMS** (<sup>+</sup>TOF-HRMS) m/z: calculated for C<sub>123</sub>H<sub>192</sub>N<sub>30</sub>O<sub>69</sub> [M+3H]<sup>3+</sup>: 1065.4219, found: 1065.4221 (Δ = 0.23 ppm).

**Synthesis of bromoacylated dendron (18):** **18** was synthesized according to **Procedure A** with tripropargylated synthon **14** (140.0 mg, 393.0 μmol, 1.00 equiv), mannoside **3** (616 mg, 1.48 mmol, 3.75 equiv), sodium ascorbate (70.0 mg, 354 μmol, 0.90 equiv), and CuSO<sub>4</sub>·5H<sub>2</sub>O (88.4 mg, 354 μmol, 0.90 equiv) in a THF/H<sub>2</sub>O mixture (6 mL, 1:1). Column chromatography on silica (DCM/MeOH 99:1 to 96:4) afforded the desired compound **18** (594 mg, 369.4 μmol, 94%) as a white solid.

**R<sub>f</sub>** = 0.47 (94:6 DCM/MeOH). **m.p.** = 68–72°C (*not corrected*). **<sup>1</sup>H NMR (300 MHz, CDCl<sub>3</sub>)** δ (ppm) 7.68 (br s, 3H, CH<sub>triazole</sub>), 6.89 (br s, 1H, NH), 5.24–5.18 (m, 9H, H<sub>2</sub>, H<sub>3</sub>, H<sub>4</sub>), 4.80 (d, *J* = 1.3 Hz, 1H, H<sub>1</sub>), 4.61–4.58 (br s, 12H, OCH<sub>2</sub>C<sub>triazole</sub> + N<sub>triazole</sub>CH<sub>2</sub>), 4.17–4.00 (m, 11H, OCH<sub>2</sub>CH<sub>2</sub> + H<sub>6a</sub> + BrCH<sub>2</sub>CONH), 3.94–3.78 (m, 9H, H<sub>6b</sub> + NHC<sub>q</sub>CH<sub>2</sub>O), 3.60 (m, 3H, H<sub>5</sub>), 2.12, 2.08, 2.03, 1.98 (4s, 36H, COCH<sub>3</sub>). **<sup>13</sup>C{<sup>1</sup>H} NMR (75 MHz, CDCl<sub>3</sub>)** δ (ppm) 170.5, 169.9, 169.9, 169.5, (COCH<sub>3</sub>), 165.6 (CONH), 145.0 (C<sub>triazole</sub>), 123.7 (CH<sub>triazole</sub>), 97.4 (C<sub>1</sub>), 69.1 (C<sub>2</sub>), 68.9 (C<sub>3</sub>), 68.8 (C<sub>5</sub>), 68.4 (NHC<sub>q</sub>CH<sub>2</sub>O), 66.2 (C<sub>6</sub>), 65.6 (C<sub>4</sub>), 64.6 (OCH<sub>2</sub>C<sub>triazole</sub>), 62.1 (OCH<sub>2</sub>CH<sub>2</sub>), 60.2 (C<sub>q</sub>), 49.6 (CH<sub>2</sub>N<sub>triazole</sub>), 29.7 (CH<sub>2</sub>Br), 20.8, 20.7, 20.6, 20.6 (COCH<sub>3</sub>). **IR** (cm<sup>-1</sup>) 2956, 2937, 2361, 2337, 1751, 1734, 1540, 1370, 1218, 1045, 759. **HRMS** (<sup>+</sup>TOF-HRMS) m/z: calculated for C<sub>63</sub>H<sub>87</sub>BrN<sub>10</sub>O<sub>34</sub> [M+2H]<sup>2+</sup>: 804.2358, found: 804.2356 (Δ = -0.18 ppm); [M+H]<sup>+</sup>: 1607.4642, found: 1607.4620 (Δ = -1.36 ppm); [M+Na]<sup>+</sup>: 1629.4462, found: 1629.4448 (Δ = -0.84 ppm).

**Synthesis of azidoacylated dendron (19):** To a stirring solution of brominated trivalent dendron **18** (121.0 mg, 75.2 μmol, 1.00 equiv) in dry DMF (1.5 mL) was added under a nitrogen atmosphere sodium azide (7.3 mg, 112 μmol, 1.50 equiv). After stirring overnight at room temperature, the solvent was removed under vacuum. EtOAc (20 mL) was added and the resulting solution was poured in a separatory funnel

containing 20 mL of EtOAc and 30 mL of a saturated aqueous solution of  $\text{NH}_4\text{Cl}$ . Organics were washed with ( $2 \times 30$  mL) of saturated  $\text{NH}_4\text{Cl}_{\text{aq}}$ , water ( $2 \times 30$  mL) and brine (20 mL). The organic phase was then dried over  $\text{MgSO}_4$  and concentrated under reduced pressure to furnish the desired compound **19** (110 mg, 69.9  $\mu\text{mol}$ , 93%) as a white solid.

$R_f = 0.47$  (94:6 DCM/MeOH). **m.p.** = 62–65°C (*not corrected*).  $^1\text{H}$  NMR (300 MHz,  $\text{CDCl}_3$ )  $\delta$  (ppm) 7.68 (br s, 3H,  $\text{CH}_{\text{triazole}}$ ), 6.69 (br s, 1H,  $\text{NH}$ ), 5.27–5.18 (m, 9H,  $H_2$ ,  $H_3$ ,  $H_4$ ), 4.80 (d,  $J = 1.3$  Hz, 1H,  $H_1$ ), 4.61–4.58 (br s, 12H,  $\text{OCH}_2\text{C}_{\text{triazole}} + \text{N}_{\text{triazole}}\text{CH}_2$ ), 4.23–4.00 (m, 11H,  $\text{OCH}_2\text{CH}_2 + H_{6a} + \text{N}_3\text{CH}_2\text{CONH}$ ), 3.90–3.81 (m, 9H,  $H_{6b} + \text{NHC}_q\text{CH}_2\text{O}$ ), 3.60 (m, 3H,  $H_5$ ), 2.12, 2.08, 2.03, 1.98 (4s, 36H,  $\text{COCH}_3$ ).  $^{13}\text{C}\{^1\text{H}\}$  NMR (75 MHz,  $\text{CDCl}_3$ )  $\delta$  (ppm) 170.4, 169.9, 169.8, 169.5, ( $\text{COCH}_3$ ), 166.7 ( $\text{CONH}$ ), 144.9 ( $\text{C}_{\text{triazole}}$ ), 123.7 ( $\text{CH}_{\text{triazole}}$ ), 97.4 ( $\text{C}_1$ ), 69.0 ( $\text{C}_2$ ), 68.8 ( $\text{C}_3$ ), 68.8 ( $\text{C}_5$ ), 68.4 ( $\text{NHC}_q\text{CH}_2\text{O}$ ), 66.1 ( $\text{C}_6$ ), 65.6 ( $\text{C}_4$ ), 64.5 ( $\text{OCH}_2\text{C}_{\text{triazole}}$ ), 62.1 ( $\text{OCH}_2\text{CH}_2$ ), 59.9 ( $\text{C}_q$ ), 52.5 ( $\text{CH}_2\text{N}_3$ ), 49.5 ( $\text{CH}_2\text{N}_{\text{triazole}}$ ), 20.7, 20.7, 20.6, 20.6 ( $\text{COCH}_3$ ). IR ( $\text{cm}^{-1}$ ) 2934, 2361, 2338, 2107 ( $\text{N}_3$ ), 1751, 1734, 1540, 1373, 1218, 1045, 761. **HRMS** ( $^+\text{TOF}$ -HRMS)  $m/z$ : calculated for  $\text{C}_{63}\text{H}_{87}\text{N}_{13}\text{O}_{34}$   $[\text{M}+\text{H}]^+$ : 1570.5551, found: 1570.5543 ( $\Delta = -0.51$  ppm);  $[\text{M}+\text{Na}]^+$ : 1592.5371, found: 1592.5366 ( $\Delta = -0.31$  ppm).

**Synthesis of peracetylated nonavalent derivative (20):** Derivative **20** was synthesized according to **Procedure A** with tripropargylated core **2** (3.9 mg, 12.1  $\mu\text{mol}$ , 1.00 equiv), trimannosylated dendron **19** (75.0 mg, 47.8  $\mu\text{mol}$ , 3.90 equiv), sodium ascorbate (6.5 mg, 33  $\mu\text{mol}$ , 2.70 equiv), and  $\text{CuSO}_4 \cdot 5\text{H}_2\text{O}$  (8.2 mg, 33  $\mu\text{mol}$ , 0.90 equiv) in a THF/ $\text{H}_2\text{O}$  mixture (4 mL, 1:1). Column chromatography on silica (DCM/MeOH 98:2 to 90:10) afforded the desired compound **20** (52.0 mg, 10.2  $\mu\text{mol}$ , 84%) as a colorless oil.  $R_f = 0.25$  (92:8 DCM/MeOH).  $^1\text{H}$  NMR (300 MHz,  $\text{CDCl}_3$ )  $\delta$  (ppm) 8.37 (m, 3H,  $\text{CH}_{\text{ar}}$ ), 8.00 (br s, 3H,  $\text{NH}$ ), 7.78 (s, 3H,  $\text{CH}_{\text{int-triazole}}$ ), 7.69 (s, 9H,  $\text{CH}_{\text{ext-triazole}}$ ), 6.94 (br s, 3H,  $\text{NH}_{\text{int}}$ ), 5.24–5.17 (m, 27H,  $H_2$ ,  $H_3$ ,  $H_4$ ), 4.98 (br s, 6H,  $\text{N}_{\text{triazole}}\text{CH}_2\text{CONH}$ ), 4.80 ( $s_{\text{app}}$ , 9H,  $H_1$ ), 4.64–4.52 (m, 42H,  $\text{OCH}_2\text{C}_{\text{triazole}} + \text{N}_{\text{triazole}}\text{CH}_2 + \text{NHCH}_2\text{C}_{\text{triazole}}$ ), 4.19–3.87 (m, 54H,  $\text{OCH}_2 + H_6 + \text{NHC}_q\text{CH}_2\text{O}$ ), 3.63–3.62 (m, 9H,  $H_5$ ), 2.11, 2.08, 2.01, 1.96 (4s, 108H,  $\text{COCH}_3$ ).  $^{13}\text{C}\{^1\text{H}\}$  NMR (75 MHz,  $\text{CDCl}_3$ )  $\delta$  (ppm) 170.5, 170.0, 169.9, 169.5 ( $\text{COCH}_3$ ), 165.8 ( $\text{CONH}$ ), 165.1 ( $\text{CONH}$ ), 144.8 ( $\text{C}_{\text{ext-triazole}}$ ), 144.7 ( $\text{C}_{\text{int-triazole}}$ ), 134.7 ( $\text{C}_{\text{arom}}$ ), 128.7 ( $\text{CH}_{\text{arom}}$ ), 124.1 ( $\text{CH}_{\text{int-triazole}}$ ), 123.4 ( $\text{CH}_{\text{ext-triazole}}$ ), 97.4 ( $\text{C}_1$ ), 69.0 ( $\text{C}_2$ ), 68.9 ( $\text{C}_3$ ), 68.7 ( $\text{C}_5$ ), 68.3 ( $\text{NHC}_q\text{CH}_2\text{O}$ ), 66.1 ( $\text{C}_6$ ), 65.5 ( $\text{C}_4$ ), 64.5 ( $\text{OCH}_2\text{C}_{\text{triazole}}$ ), 62.1 ( $\text{OCH}_2$ ), 60.3 ( $\text{C}_q$ ), 52.4 ( $\text{N}_{\text{triazole}}\text{CH}_2\text{CONH}$ ), 49.5 ( $\text{CH}_2\text{N}_{\text{triazole}}$ ), 35.5 ( $\text{HNCH}_2\text{C}_{\text{triazole}}$ ), 20.8, 20.7, 20.6, 20.6 ( $\text{COCH}_3$ ). **HRMS** ( $^+\text{TOF}$ -HRMS)  $m/z$ : calculated for  $\text{C}_{207}\text{H}_{276}\text{N}_{42}\text{O}_{105}$   $[\text{M}+2\text{H}]^{2+}$ : 2515.8847, found: 2515.8845 ( $\Delta = -0.08$  ppm);  $[\text{M}+3\text{H}]^{3+}$ : 1677.5922, found: 1677.5936 ( $\Delta = 0.79$  ppm).

**Synthesis of de-O-acetylated nonavalent derivative (21):** Derivative **21** was synthesized according to **Procedure B** with **20** (40.0 mg, 7.95  $\mu\text{mol}$ ) previously dissolved in anhydrous MeOH (3 mL). After

filtration, the solvent was removed under vacuum with rotary evaporator and the residue was lyophilized to furnish desired de-*O*-acetylated nonamer **21** as a white solid (28.0 mg, 7.95  $\mu$ mol) in a 99% yield.

**$^1\text{H}$  NMR (600 MHz,  $\text{D}_2\text{O}$ )**  $\delta$  (ppm) 8.27 (m, 3H,  $\text{CH}_{\text{ar}}$ ), 7.96 (m, 12H,  $\text{CH}_{\text{triazole}}$ ), 5.15 (br s, 6H,  $\text{N}_{\text{triazole}}\text{CH}_2\text{CONH}$ ), 4.72 (s, 9H,  $H_1$ ), 4.66 (s, 6H  $\text{OCNHCH}_2\text{C}_{\text{triazole}}$ ), 4.57–4.51 (m, 36H,  $\text{OCH}_2\text{C}_{\text{triazole}}$  +  $\text{N}_{\text{triazole}}\text{CH}_2$ ), 4.06–4.01 (m, 9H,  $\text{OCHHCH}_2\text{N}$ ), 3.83–3.80 (m, 18H,  $\text{OCHHCH}_2\text{N}$  +  $H_2$ ), 3.69–3.54 (m, 54H,  $\text{NHC}_q\text{CH}_2\text{O}$  +  $H_6$  +  $H_4$  +  $H_3$ ), 3.01 (m, 9H,  $H_5$ ).  **$^{13}\text{C}\{^1\text{H}\}$  NMR (150 MHz,  $\text{D}_2\text{O}$ )**  $\delta$  (ppm) 168.4 (CONH), 167.6 (CONH), 145.2 ( $\text{C}_{\text{ext-triazole}}$ ), 144.5 ( $\text{C}_{\text{int-triazole}}$ ), 135.0 ( $\text{C}_{\text{arom}}$ ), 129.8 ( $\text{CH}_{\text{arom}}$ ), 126.1 ( $\text{CH}_{\text{int-triazole}}$ ), 126.0 ( $\text{CH}_{\text{ext-triazole}}$ ), 100.2 ( $\text{C}_1$ ), 73.4 ( $\text{C}_5$ ), 71.1 ( $\text{C}_3$ ), 70.6 ( $\text{C}_2$ ), 67.8 ( $\text{NHC}_q\text{CH}_2\text{O}$ ), 67.0 ( $\text{OCH}_2\text{CH}_2\text{N}_{\text{triazole}}$ ), 66.1 ( $\text{C}_4$ ), 64.1 ( $\text{OCH}_2\text{C}_{\text{triazole}}$ ), 61.3 ( $\text{C}_6$ ), 60.9 ( $\text{C}_q$ ), 52.4 ( $\text{N}_{\text{triazole}}\text{CH}_2\text{CONH}$ ), 50.7 ( $\text{CH}_2\text{N}_{\text{triazole}}$ ), 35.7 ( $\text{OCHNCH}_2\text{C}_{\text{triazole}}$ ). **HRMS** ( $^+$ ESI-HRMS)  $m/z$ : calculated for  $\text{C}_{135}\text{H}_{204}\text{N}_{42}\text{O}_{69}$   $[\text{M}+3\text{H}]^{3+}$ : 1173.4655, found: 1173.4671 ( $\Delta = 1.44$  ppm);  $[\text{M}+3\text{Na}]^{3+}$ : 1195.4474, found: 1195.4490 ( $\Delta = 1.31$  ppm).

**Synthesis of peracetylated 27-mer derivative (22):** Derivative **22** was synthesized according to **Procedure A** with nonapropargylated core **10** (4.6 mg, 5.38  $\mu$ mol, 1.00 equiv), trimannosylated dendron **19** (95.0 mg, 60.5  $\mu$ mol, 11.25 equiv), sodium ascorbate (2.9 mg, 15  $\mu$ mol, 2.70 equiv), and  $\text{CuSO}_4 \cdot 5\text{H}_2\text{O}$  (3.6 mg, 15  $\mu$ mol, 0.90 equiv) in a THF/ $\text{H}_2\text{O}$  mixture (3 mL, 1:1). Column chromatography on silica (DCM/MeOH 98:2 to 90:10) afforded the desired compound **22** (50.0 mg, 3.33  $\mu$ mol, 63%) as a yellowish oil.

$R_f = 0.72$  (90:10 DCM/MeOH).  **$^1\text{H}$  NMR (600 MHz,  $\text{CDCl}_3$ )**  $\delta$  (ppm) 8.27 (m, 3H,  $\text{CH}_{\text{ar}}$ ), 7.79 (s, 9H,  $\text{CH}_{\text{int-triazole}}$ ), 7.75 (s, 27H,  $\text{CH}_{\text{ext-triazole}}$ ), 7.34–7.31 (m, 12H, NH), 5.23–5.18 (m, 81H,  $H_2$ ,  $H_3$ ,  $H_4$ ), 5.05 (br s, 18H,  $\text{N}_{\text{triazole}}\text{CH}_2\text{CONH}$ ), 4.81 ( $s_{\text{app}}$ , 27H,  $H_1$ ), 4.62–4.53 (m, 126H,  $\text{OCH}_2\text{C}_{\text{triazole}}$  +  $\text{N}_{\text{triazole}}\text{CH}_2$ ), 4.20–3.64 (m, 207H,  $\text{OCH}_2$  +  $H_6$  +  $\text{NHC}_q\text{CH}_2\text{O}$  +  $H_5$ ), 2.11, 2.08, 2.01, 1.96 (4s, 324H,  $\text{COCH}_3$ ).  **$^{13}\text{C}\{^1\text{H}\}$  NMR (150 MHz,  $\text{CDCl}_3$ )**  $\delta$  (ppm) 170.6, 170.5, 170.0, 169.9, 169.9, 169.7, 169.6 ( $\text{COCH}_3$ ), 168.4 (CONH), 165.4 (CONH), 144.9 + 144.8 ( $\text{C}_{\text{ext-triazole}}$ ), 144.5 ( $\text{C}_{\text{int-triazole}}$ ), 135.6 ( $\text{C}_{\text{arom}}$ ), 128.6 ( $\text{CH}_{\text{arom}}$ ), 124.9 ( $\text{CH}_{\text{int-triazole}}$ ), 124.0 ( $\text{CH}_{\text{ext-triazole}}$ ), 97.5 ( $\text{C}_1$ ), 69.1 ( $\text{C}_2$ ), 69.0 ( $\text{C}_3$ ), 68.7 ( $\text{C}_5$ ), 68.4 ( $\text{NHC}_q\text{CH}_2\text{O}$ ), 66.2 ( $\text{C}_6$ ), 65.6 ( $\text{C}_4$ ), 64.5 ( $\text{OCH}_2\text{C}_{\text{triazole}}$ ), 62.1 ( $\text{OCH}_2$ ), 60.4 ( $\text{C}_q$ ), 52.4 ( $\text{N}_{\text{triazole}}\text{CH}_2\text{CONH}$ ), 49.5 ( $\text{CH}_2\text{N}_{\text{triazole}}$ ), 20.8, 20.8, 20.7, 20.7 ( $\text{COCH}_3$ ). **MS** ( $^+$ TOF-MS)  $m/z$ : calculated for  $\text{C}_{615}\text{H}_{834}\text{N}_{120}\text{O}_{318}$   $[\text{M}+\text{H}]^+$ : 14995.8, found: 14995.9.

**Synthesis of de-*O*-acetylated 27-mer derivative (23):** Derivative **23** was synthesized according to **Procedure B** with **22** (30.0 mg, 2.00  $\mu$ mol) previously dissolved in anhydrous MeOH (3 mL). After filtration, the solvent was removed under vacuum with rotary evaporator and the residue was lyophilized to yield the fully deprotected 27-mer **23** as a white solid (17.0 mg, 1.63  $\mu$ mol) in a 82% yield.

**$^1\text{H}$  NMR (600 MHz,  $\text{D}_2\text{O}$ )**  $\delta$  (ppm) 8.06 (m, 3H,  $\text{CH}_{\text{ar}}$ ), 7.97 (s, 27H,  $\text{CH}_{\text{ext-triazole}}$ ), 7.96 (s, 9H,  $\text{CH}_{\text{int-triazole}}$ ), 5.14 (br s, 18H,  $\text{N}_{\text{triazole}}\text{CH}_2\text{CONH}$ ), 4.75 (s, 27H,  $H_1$ ), 4.59–4.51 (m, 126H,  $\text{OCH}_2\text{C}_{\text{triazole}}$  +  $\text{N}_{\text{triazole}}\text{CH}_2$ ), 4.05–4.03 (m, 27H,  $\text{OCHHCH}_2\text{N}$ ), 3.83–3.80 (m, 72H,  $\text{OCHHCH}_2\text{N}$  +  $H_2$  +  $\text{NHC}_q\text{CH}_2\text{O}_{\text{int}}$ ), 3.71–3.57 (m,

162H,  $\text{NHC}_q\text{CH}_2\text{O}_{\text{ext}} + H_6 + H_4 + H_3$ ), 3.01 (m, 27H,  $H_5$ ).  $^{13}\text{C}\{^1\text{H}\}$  NMR (150 MHz,  $\text{D}_2\text{O}$ )  $\delta$  (ppm) 168.8 ( $\text{CONH}_{\text{int}}$ ), 167.5 ( $\text{CONH}_{\text{ext}}$ ), 144.7 ( $C_{\text{ext-triazole}}$ ), 144.6 ( $C_{\text{int-triazole}}$ ), 135.7 ( $C_{\text{arom}}$ ), 129.7 ( $\text{CH}_{\text{arom}}$ ), 127.0 ( $\text{CH}_{\text{int-triazole}}$ ), 126.1 ( $\text{CH}_{\text{ext-triazole}}$ ), 100.2 ( $C_1$ ), 73.5 ( $C_5$ ), 71.1 ( $C_3$ ), 70.6 ( $C_2$ ), 68.2 ( $\text{NHC}_q\text{CH}_2\text{O}$ ), 68.0 ( $\text{NHC}_q\text{CH}_2\text{O}$ ), 67.0 ( $\text{OCH}_2\text{CH}_2\text{N}_{\text{triazole}}$ ), 66.1 ( $C_4$ ), 64.2 ( $\text{OCH}_2\text{C}_{\text{triazole}}$ ), 61.3 ( $C_6$ ), 60.9 ( $C_q$ ), 52.9 ( $\text{N}_{\text{triazole}}\text{CH}_2\text{CONH}$ ), 50.7 ( $\text{CH}_2\text{N}_{\text{triazole}}$ ), 35.7 ( $\text{OCHNCH}_2\text{C}_{\text{triazole}}$ ). **HRMS** ( $^{+}\text{TOF-HRMS}$ ) m/z: calculated for  $\text{C}_{399}\text{H}_{204}\text{N}_{120}\text{O}_{210}$   $[\text{M}+7\text{H}]^{7+}$ : 1494.6002, found: 1494.5951 ( $\Delta = -3.43$  ppm).

## NMR, IR, and mass spectra

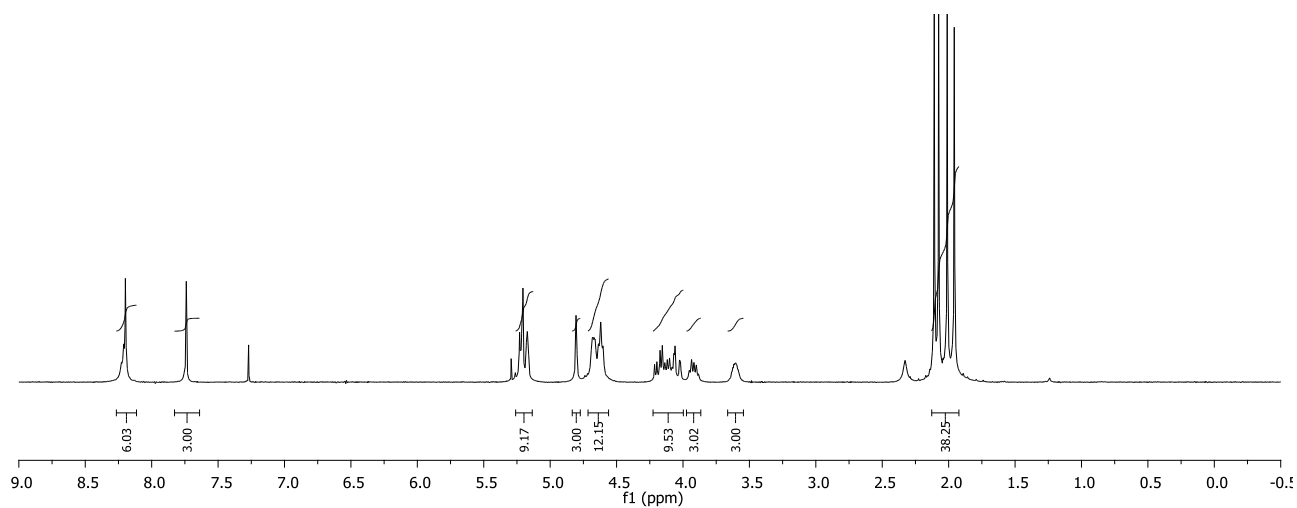

**Figure S1:**  $^1\text{H}$  NMR spectrum of compound **4** ( $\text{CDCl}_3$ , 300 MHz).

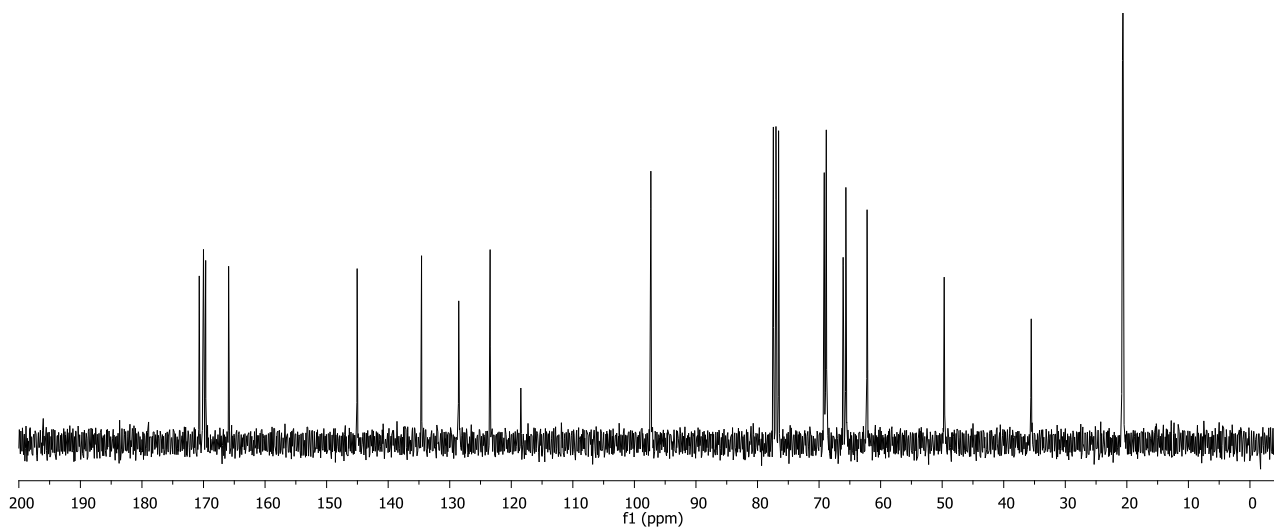

**Figure S2:**  $^{13}\text{C}$  NMR spectrum of compound **4** ( $\text{CDCl}_3$ , 75 MHz).

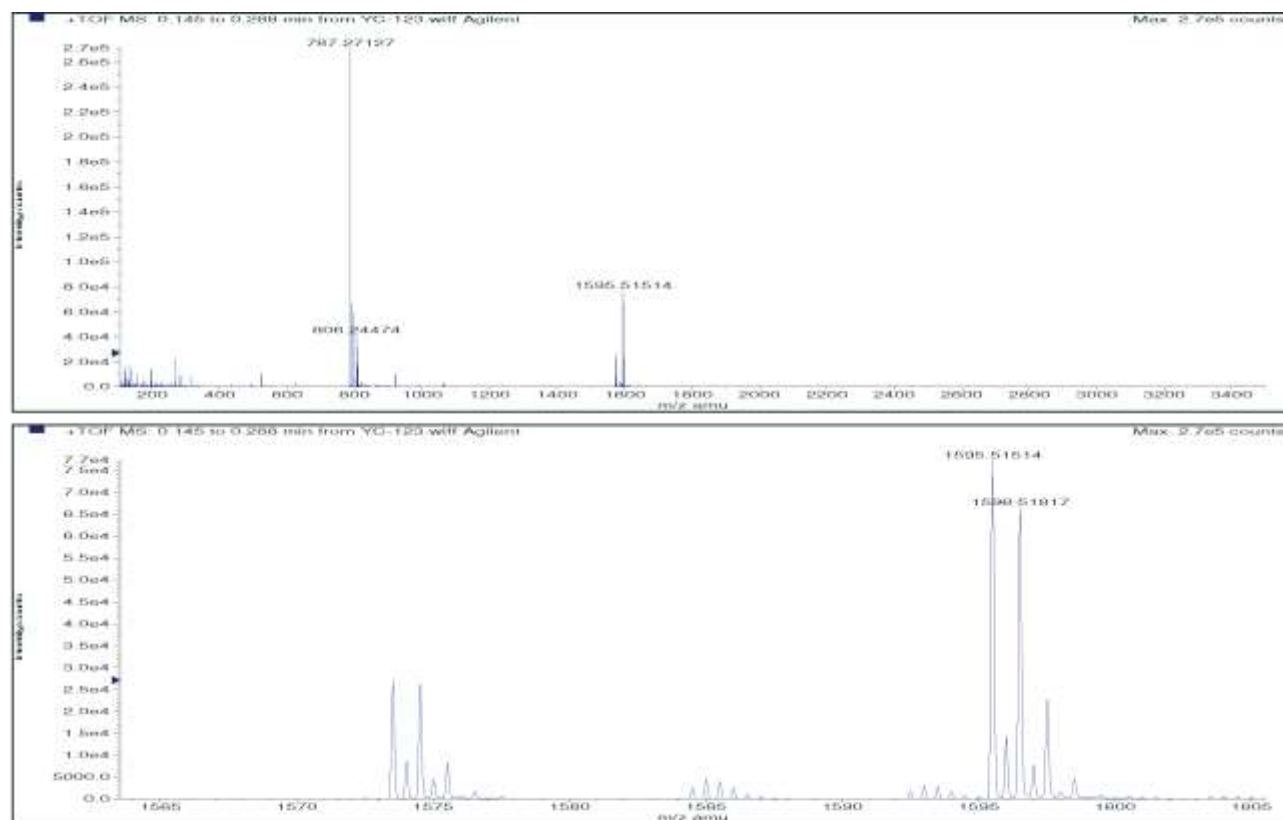

| Formula      | Compound name | Mass       | Peak RT (min) | Peak area  | Description |
|--------------|---------------|------------|---------------|------------|-------------|
| C66H84N12O33 | --            | 1572.52637 | 0.21          | 2.87273 E6 | --          |

| Species             | Abundance (counts) | Ion Mass   | Measured Mass | Error (mDa) | Error (ppm) | Ret. Time Error (min) |
|---------------------|--------------------|------------|---------------|-------------|-------------|-----------------------|
| [M+H] <sup>+</sup>  | 27482.99           | 1573.53365 | 1573.53226    | -1.39237    | -0.88       | --                    |
| [M+Na] <sup>+</sup> | 77859.75           | 1595.51559 | 1595.51514    | -0.45717    | -0.29       | --                    |

**Figure S3:** HRMS analysis (<sup>+</sup>TOF) for compound **4**.

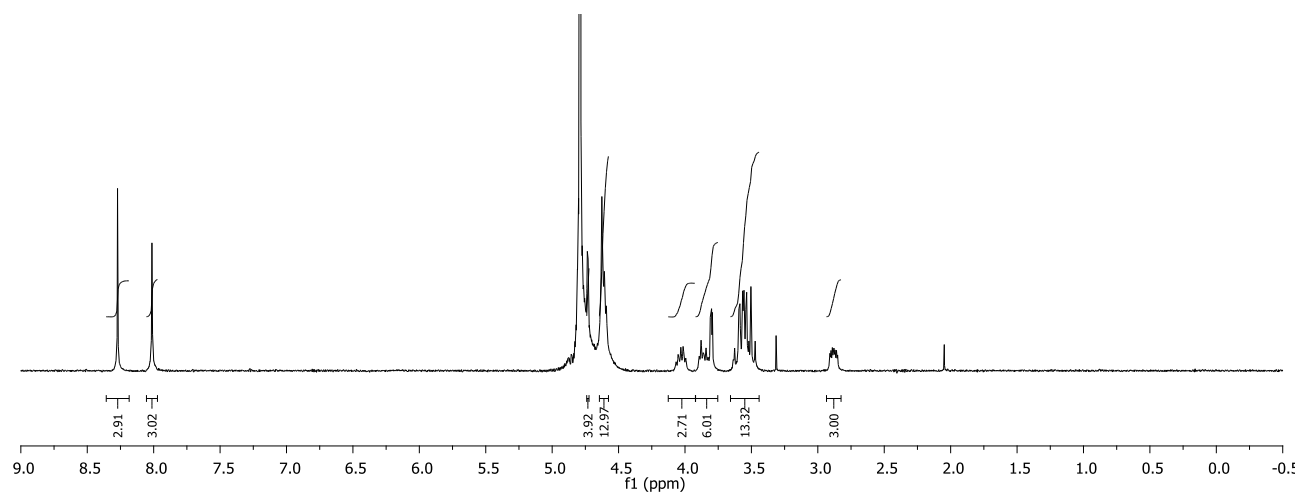

**Figure S4:** <sup>1</sup>H NMR spectrum of compound **5** (D<sub>2</sub>O, 300 MHz).

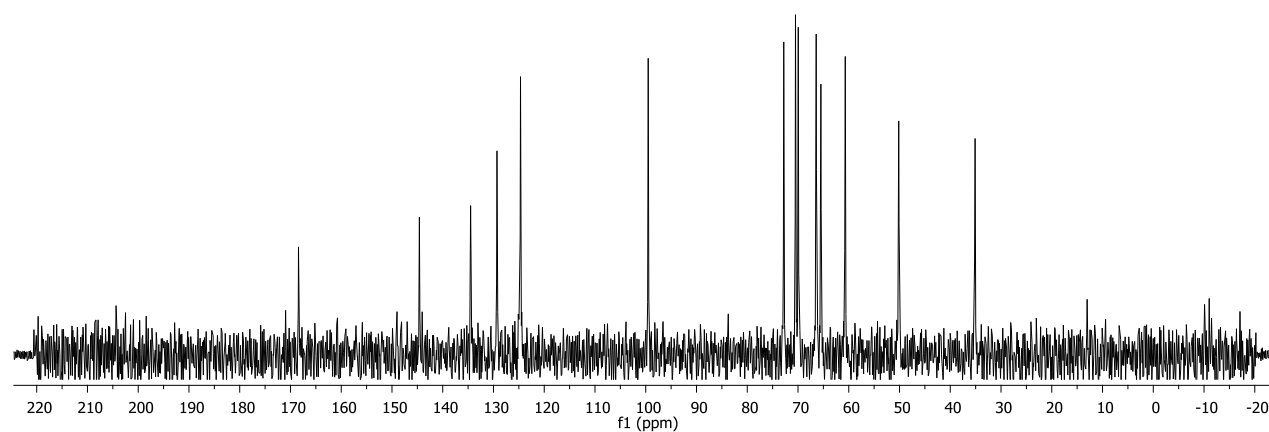

**Figure S5:**  $^{13}\text{C}$  NMR spectrum of compound **5** ( $\text{D}_2\text{O}$ , 75 MHz).

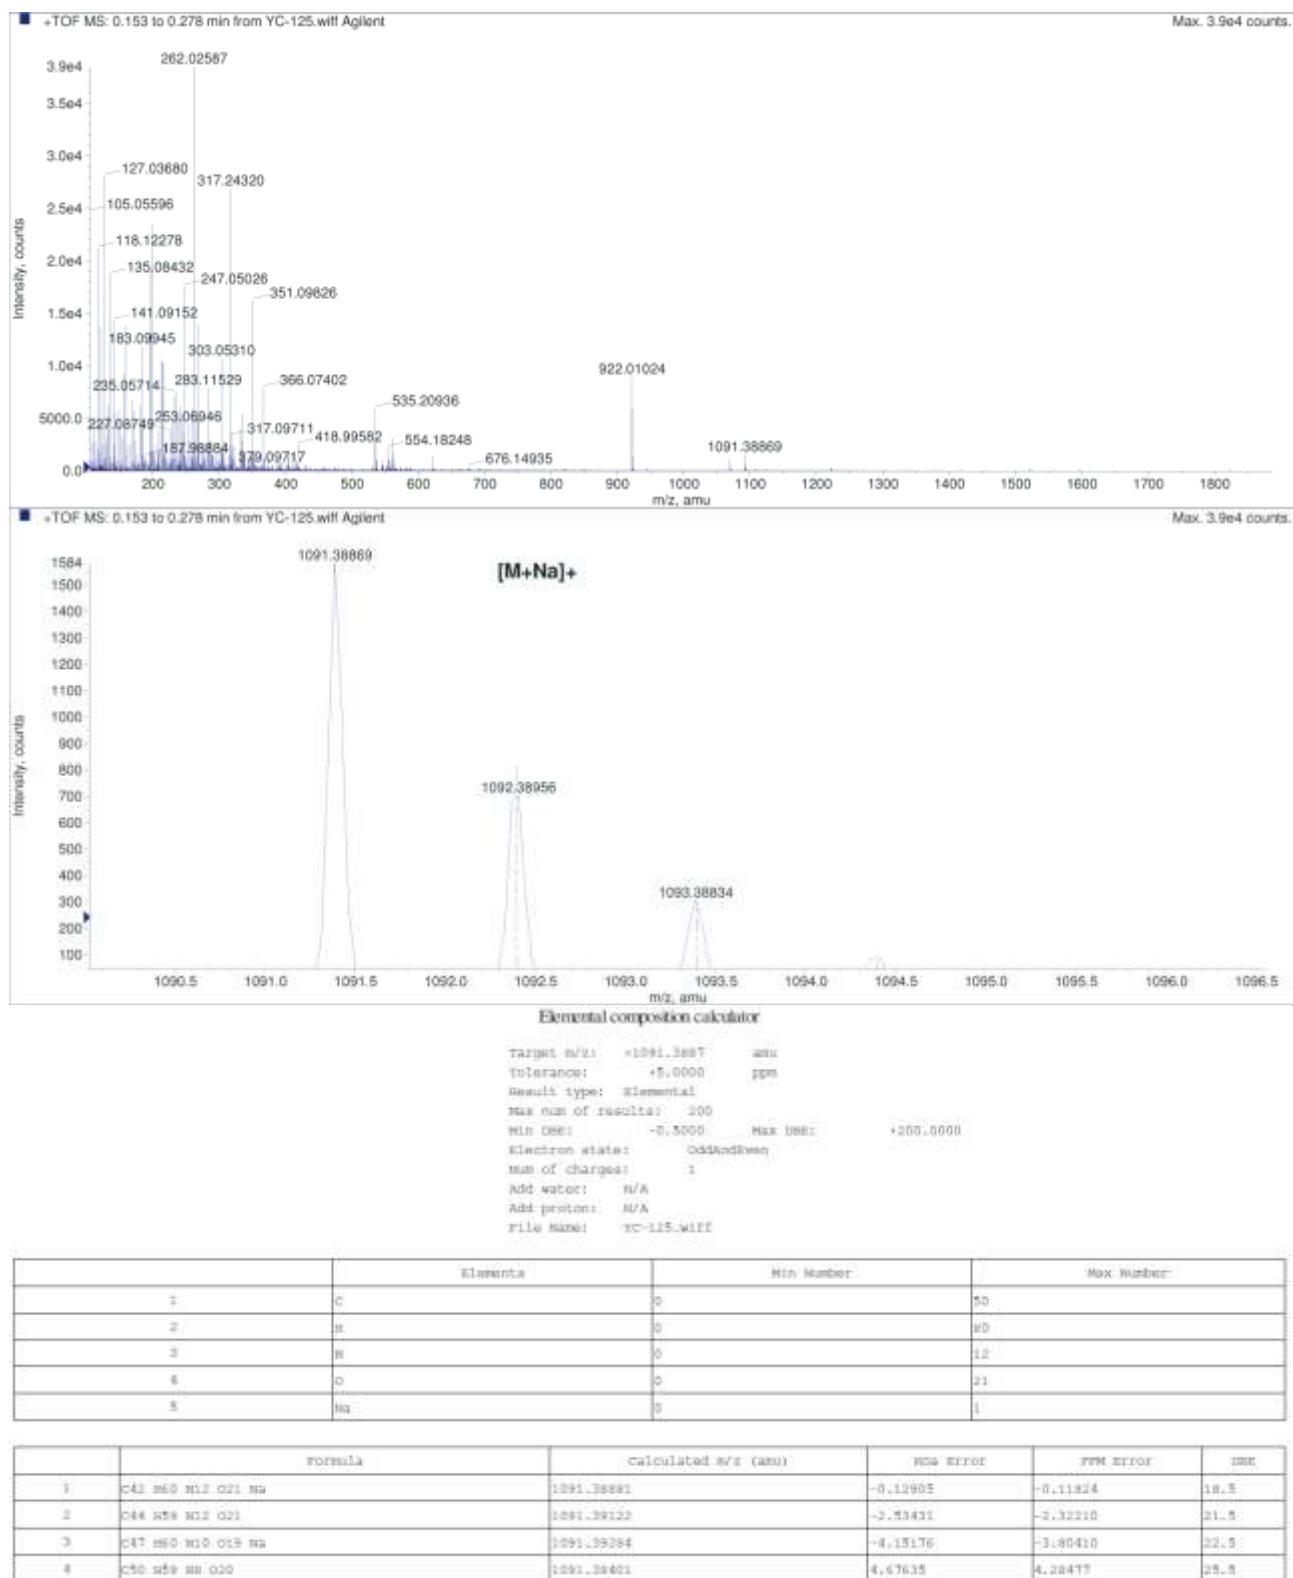

Figure S6: HRMS analysis (<sup>+</sup>TOF) for compound 5.

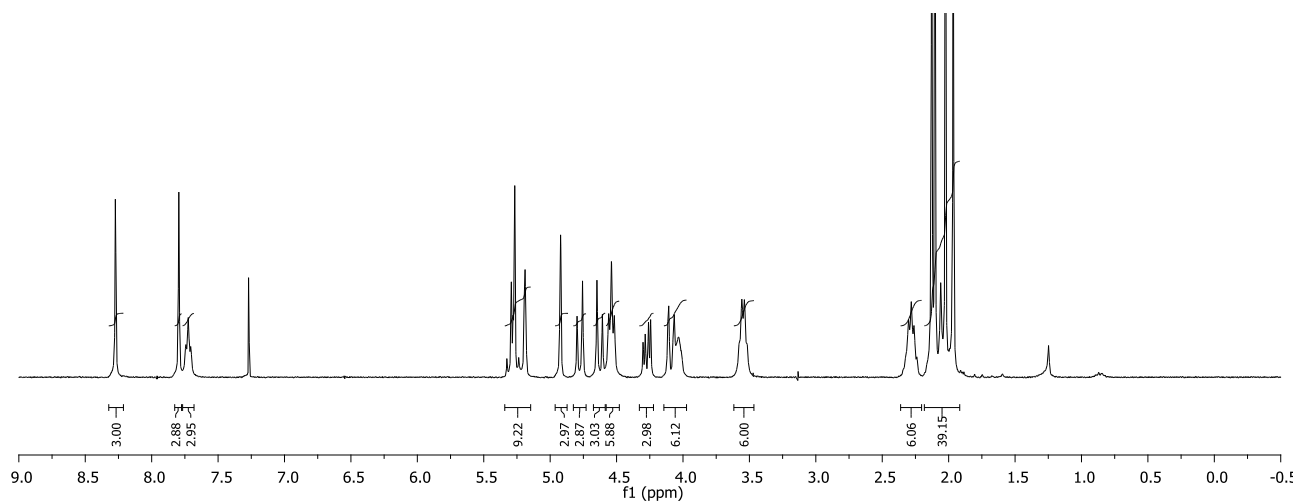

**Figure S7:**  $^1\text{H}$  NMR spectrum of compound **8** ( $\text{CDCl}_3$ , 600 MHz).

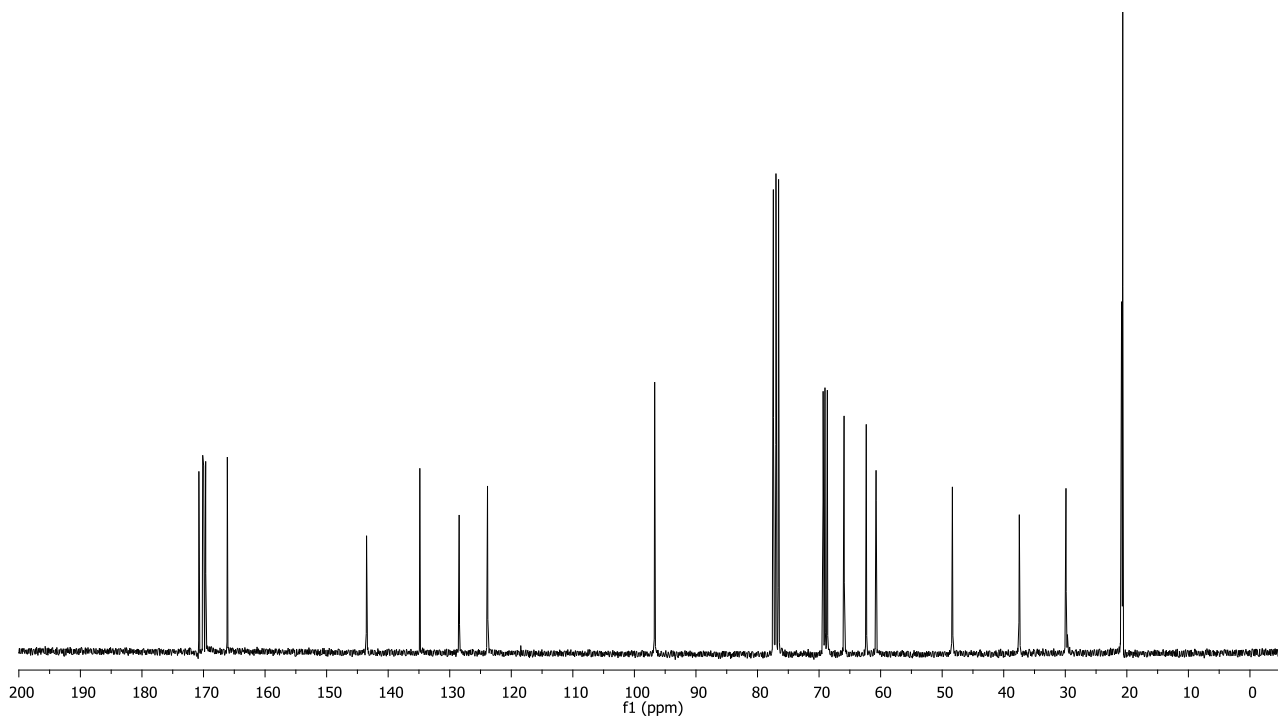

**Figure S8:**  $^{13}\text{C}$  NMR spectrum of compound **8** ( $\text{CDCl}_3$ , 150 MHz).

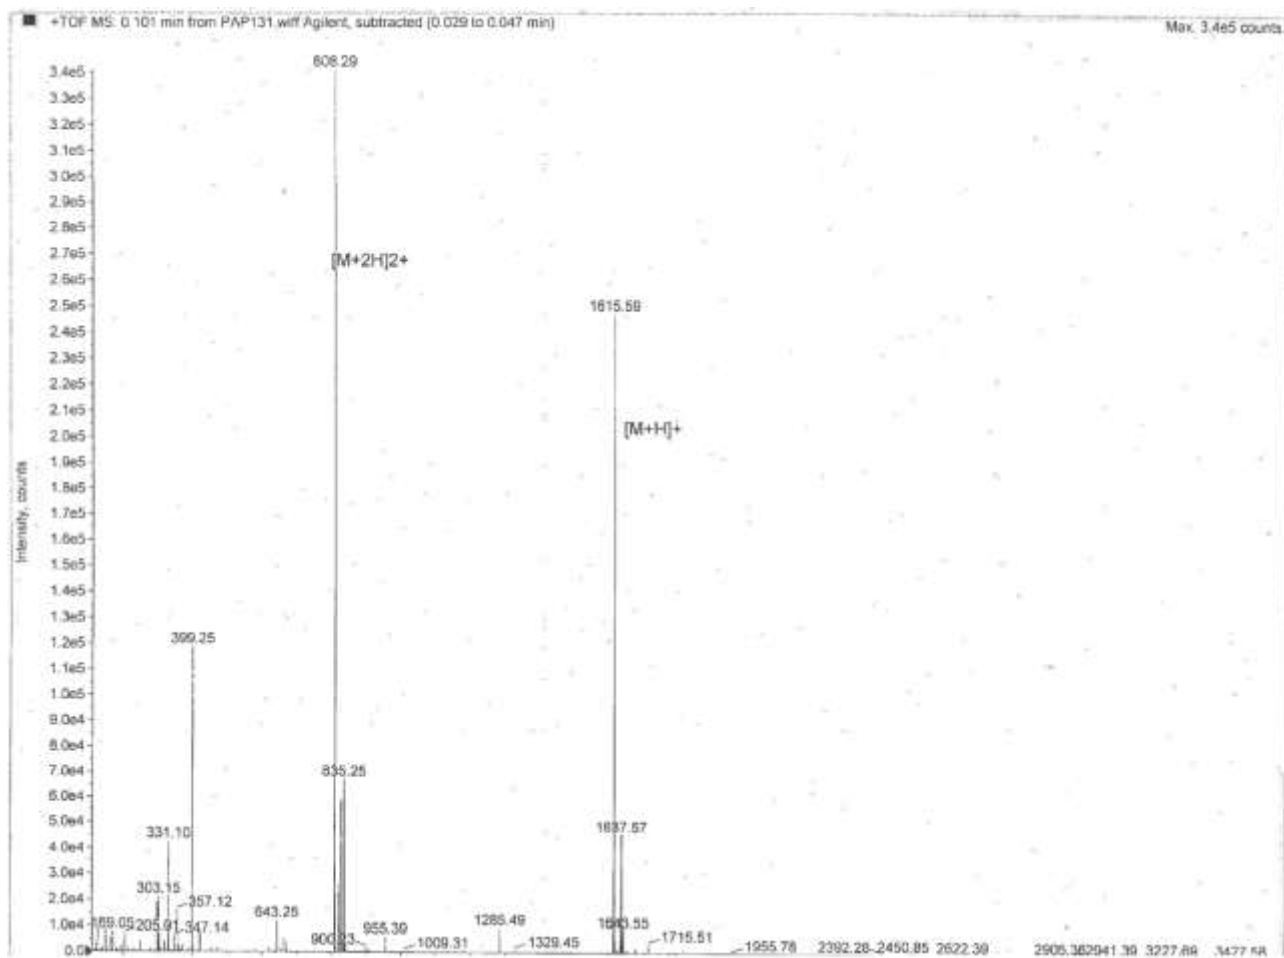

**Figure S9:** MS analysis ( $^+$ TOF) for compound **8**.

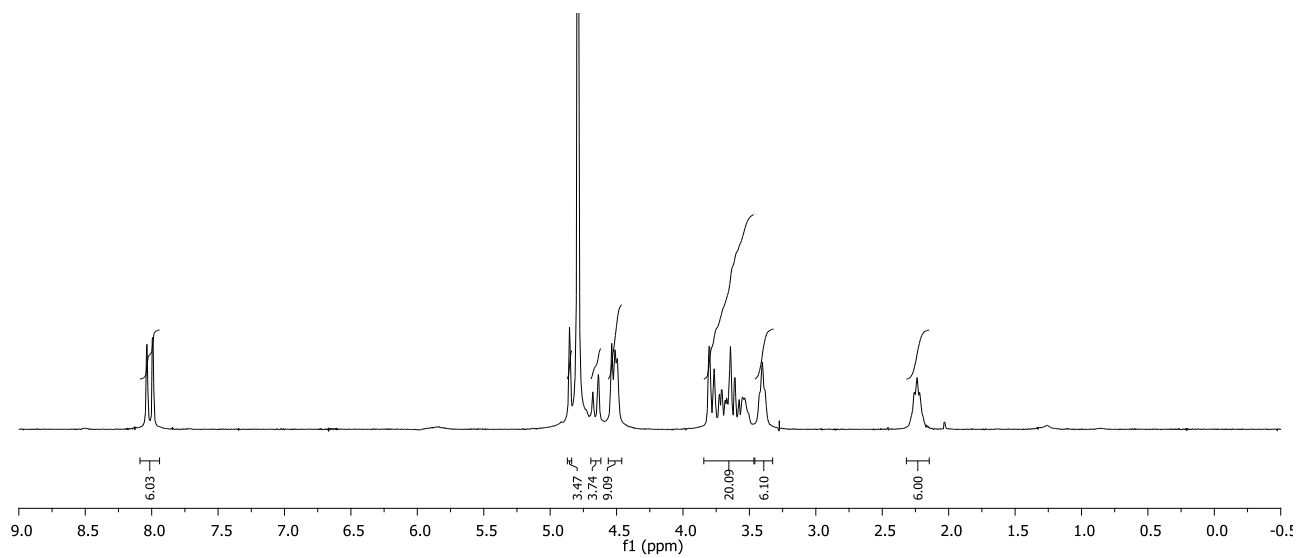

**Figure S10:**  $^1\text{H}$  NMR spectrum of compound **9** ( $\text{D}_2\text{O}$ , 300 MHz).

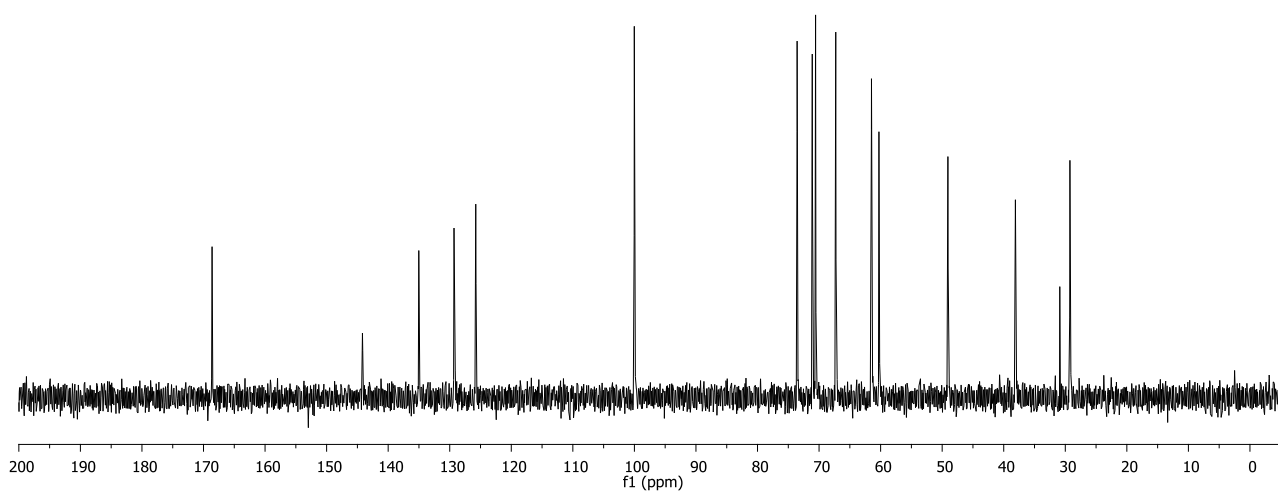

**Figure S11:**  $^{13}\text{C}$  NMR spectrum of compound **9** ( $\text{D}_2\text{O}$ , 75 MHz).

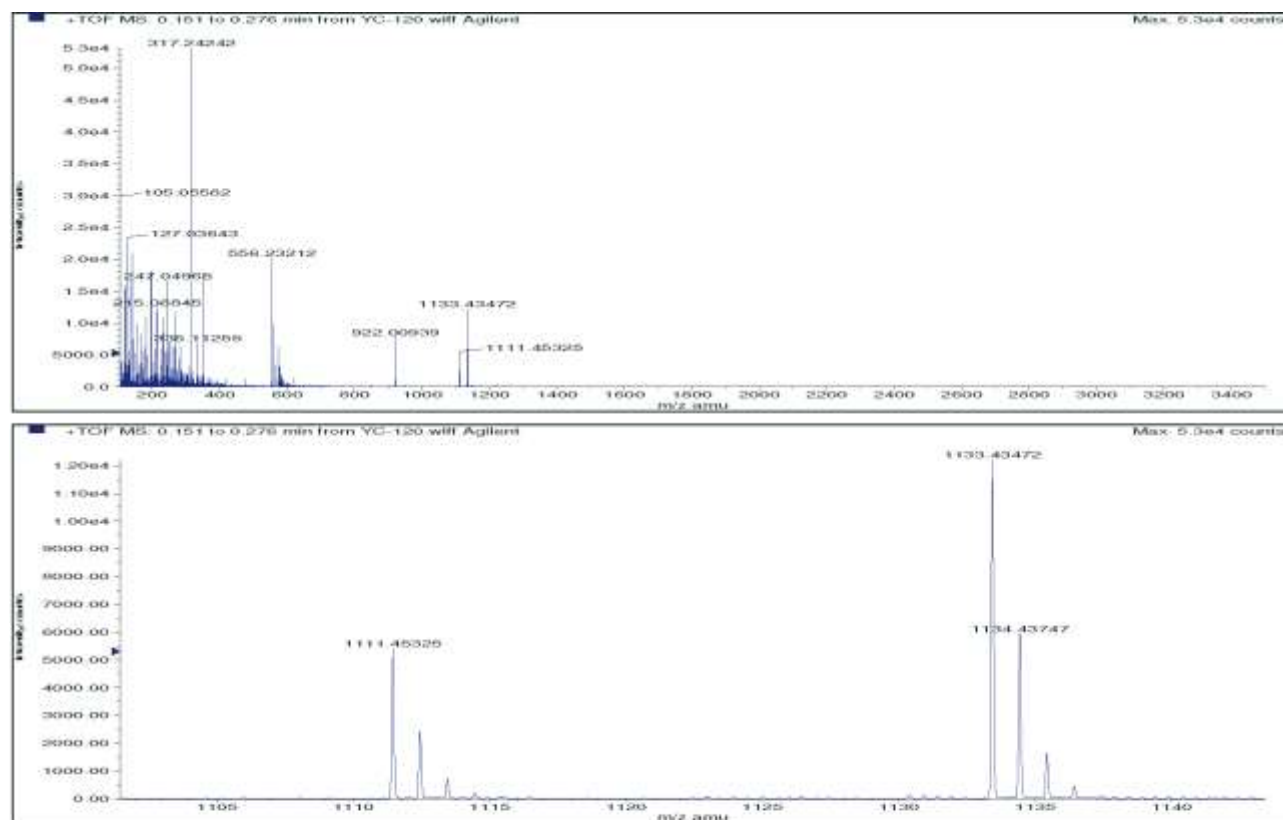

| Formula      | Compound name | Mass       | Peak RT (min) | Peak area  | Description |
|--------------|---------------|------------|---------------|------------|-------------|
| C45H66N12O21 | --            | 1110.44655 | 0.18          | 3.89733 E5 | --          |

| Species             | Abundance (counts) | Ion Mass   | Measured Mass | Error (mDa) | Error (ppm) | Ret. Time Error (min) |
|---------------------|--------------------|------------|---------------|-------------|-------------|-----------------------|
| [M+H] <sup>+</sup>  | 5408.33            | 1111.45382 | 1111.45325    | -0.57258    | -0.52       | --                    |
| [M+Na] <sup>+</sup> | 12232.50           | 1133.43577 | 1133.43472    | -1.05035    | -0.93       | --                    |

**Figure S12:** HRMS analysis (<sup>+</sup>TOF) for compound **9**.

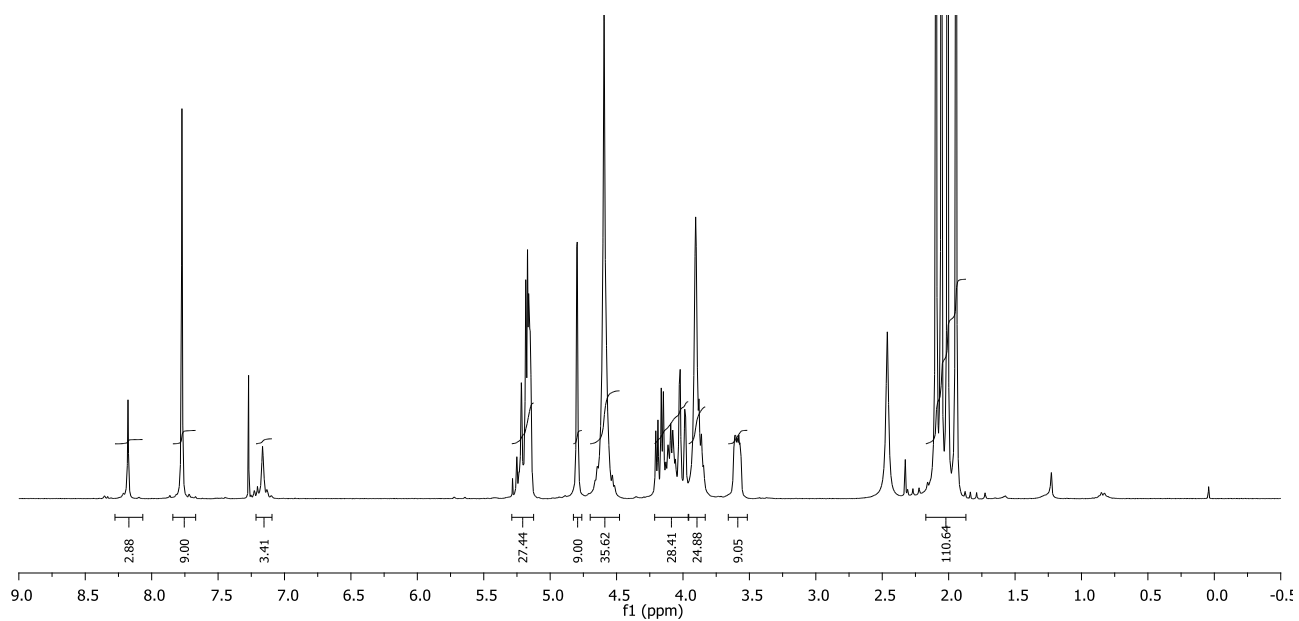

**Figure S13:** <sup>1</sup>H NMR spectrum of compound **11** (CDCl<sub>3</sub>, 300 MHz).

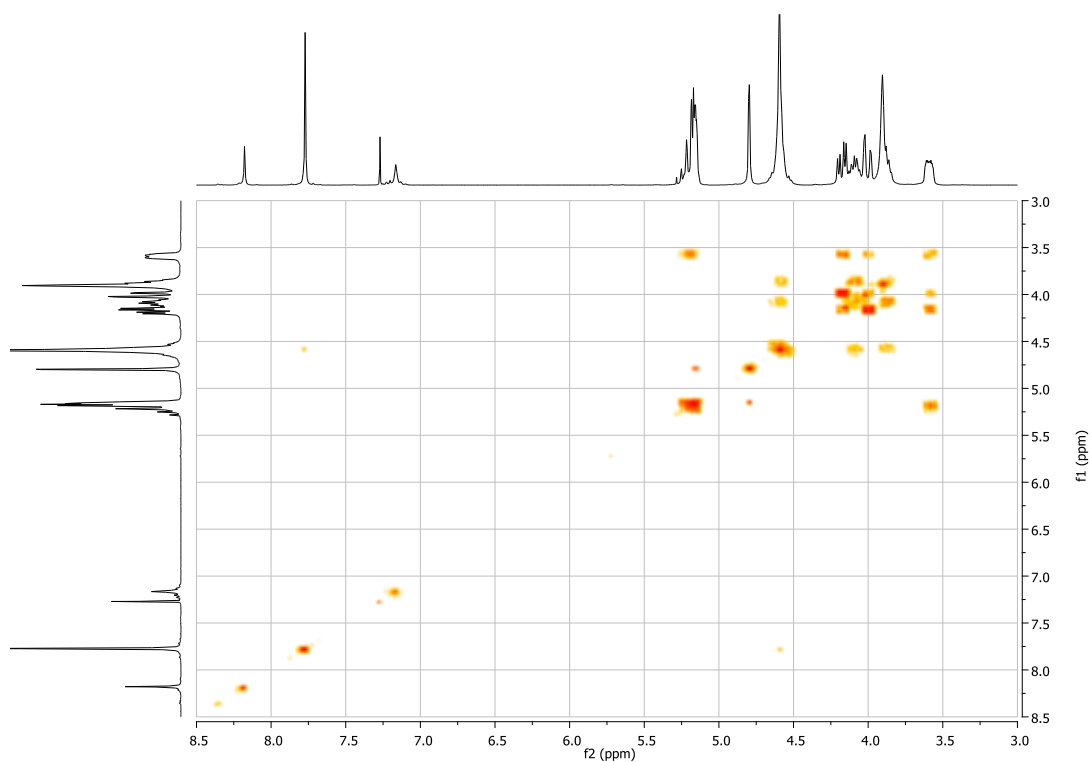

**Figure S14:** COSY spectrum of compound **11** (CDCl<sub>3</sub>).

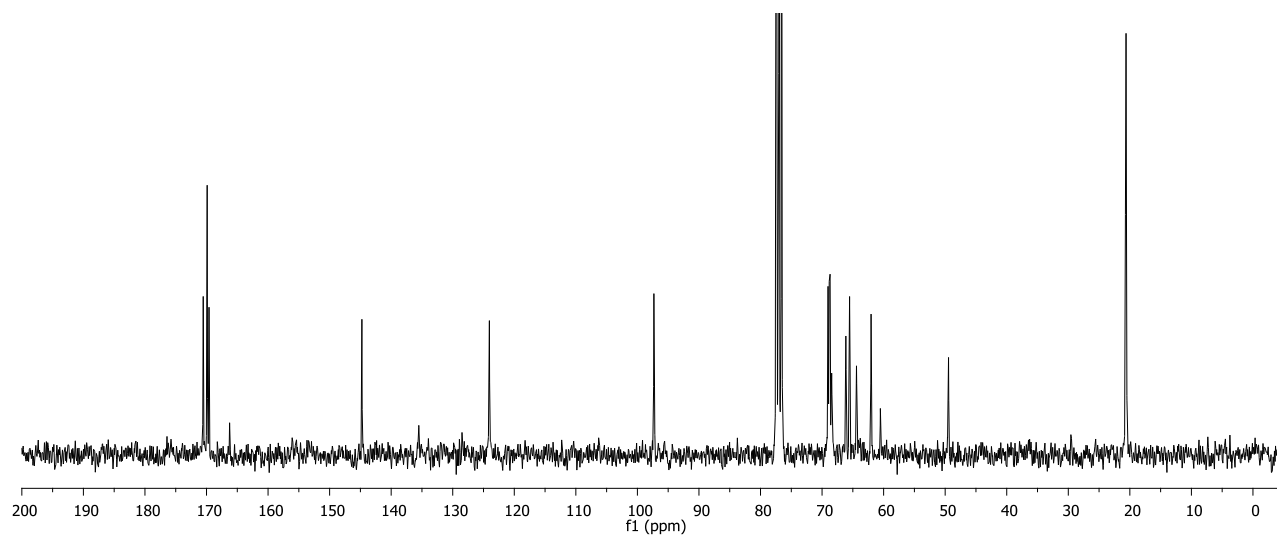

**Figure S15:**  $^{13}\text{C}$  NMR spectrum of compound **11** ( $\text{CDCl}_3$ , 75 MHz).

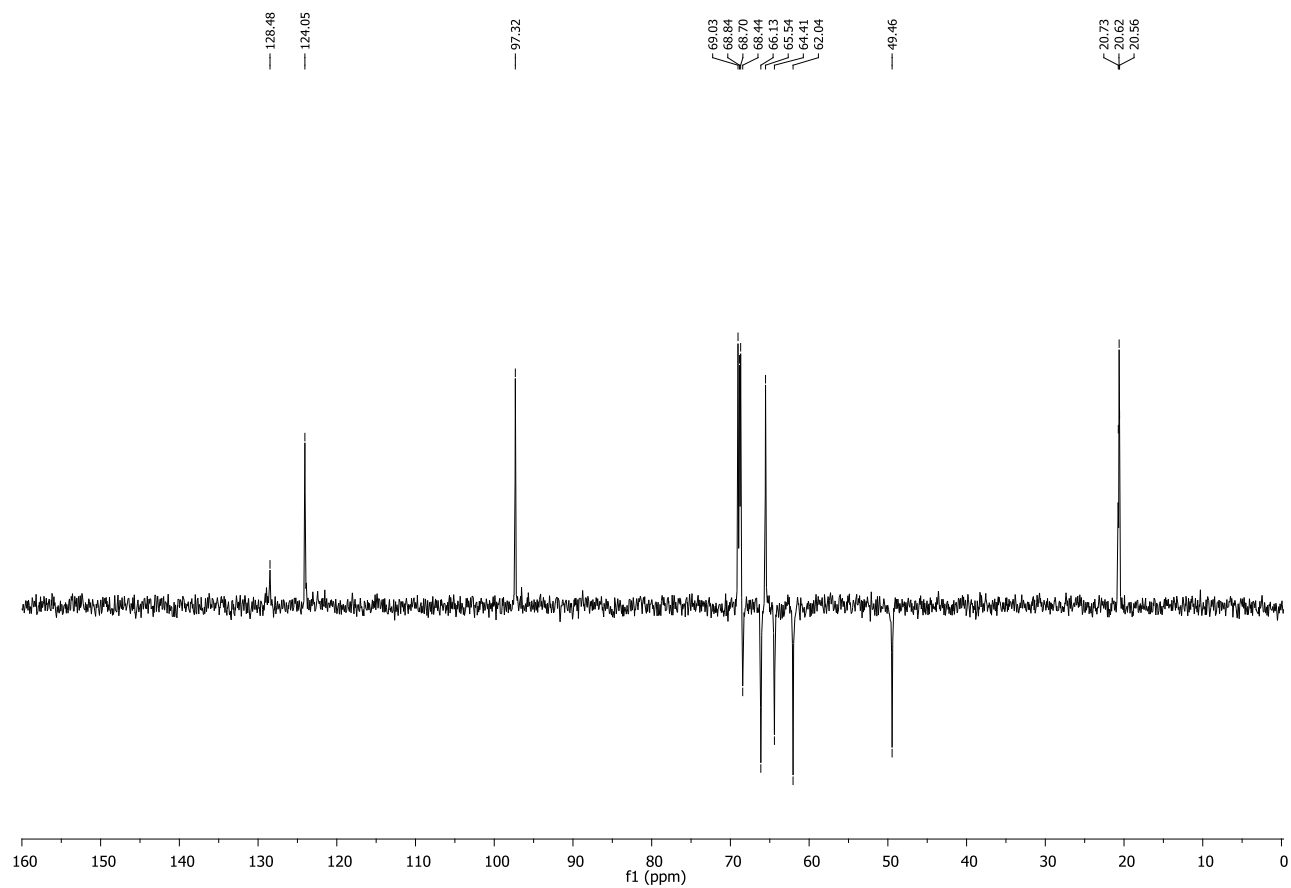

**Figure S16:** DEPT 135 spectrum for compound **11**.

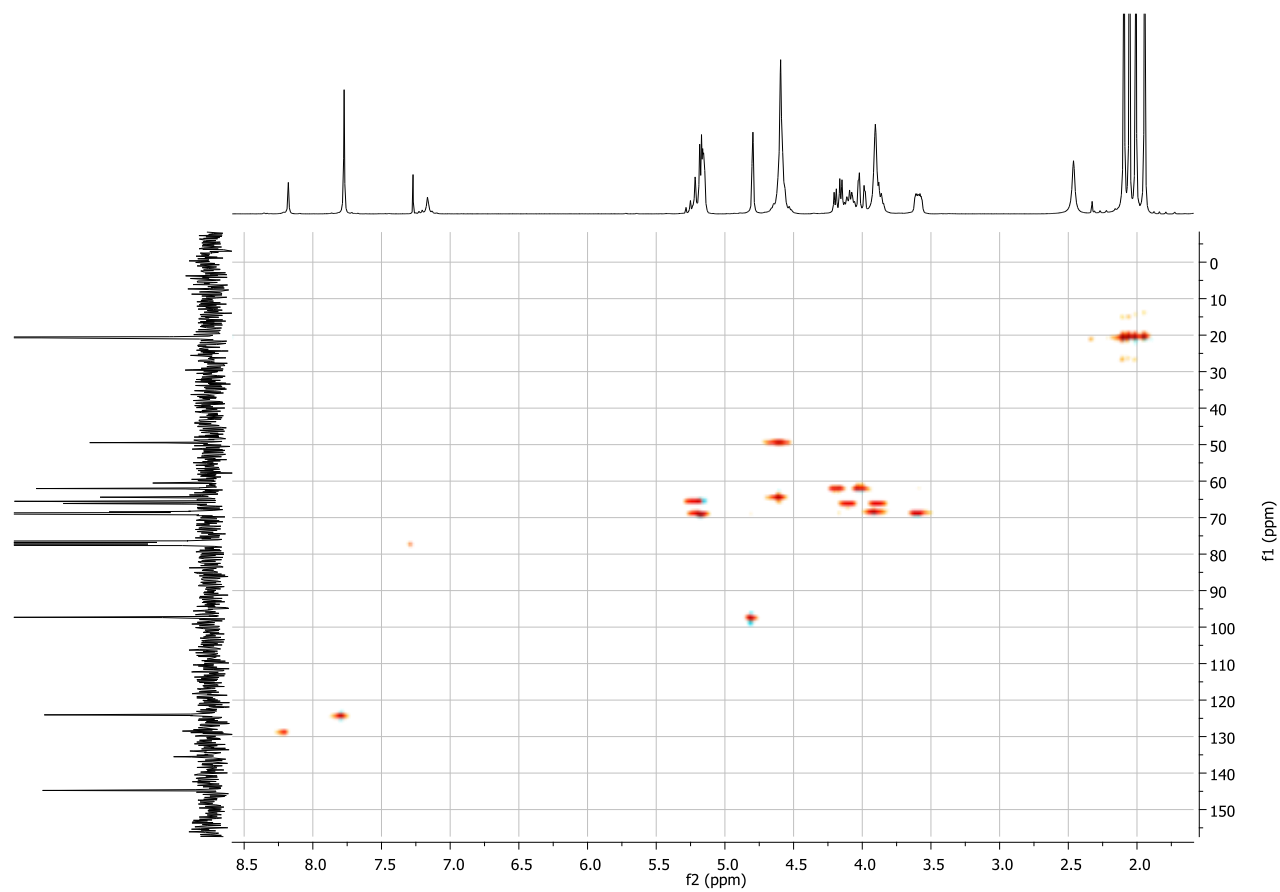

**Figure S17:** HSQC spectrum for compound **11**.

MS Spectrum

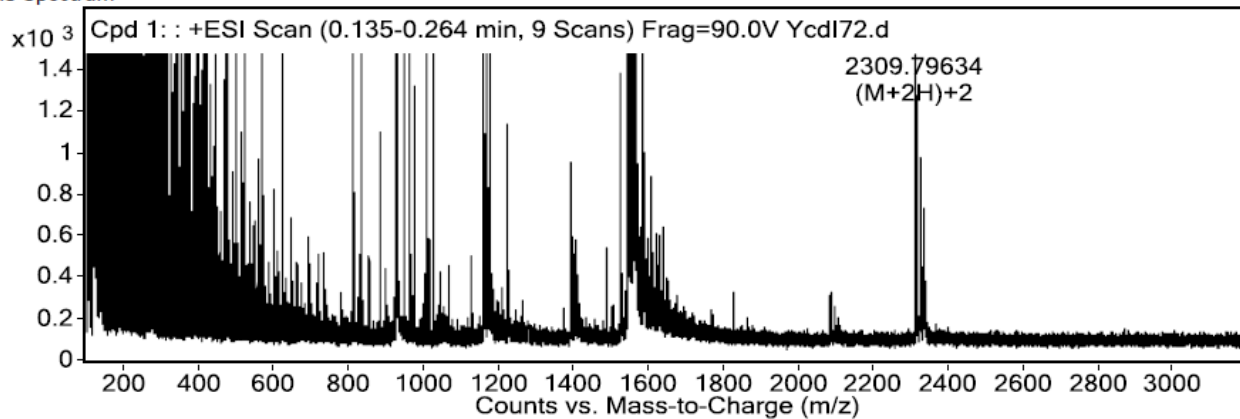

MS Zoomed Spectrum

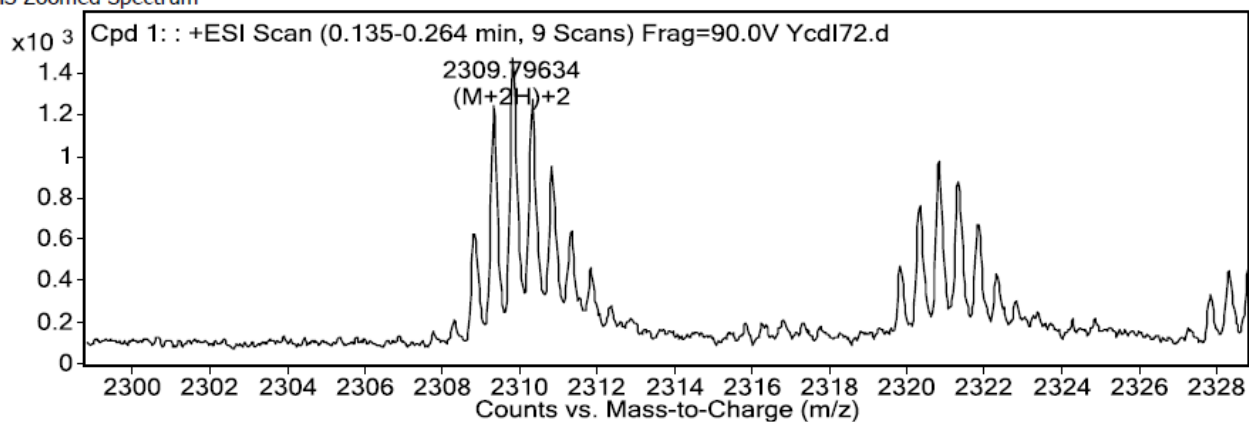

MS Spectrum Peak List

| Ion      | Ion Formula     | Abund    | Expe. m/z  | Calc. m/z  | Diff(ppm) |
|----------|-----------------|----------|------------|------------|-----------|
|          |                 | 717775.9 | 134.11783  |            |           |
| (M+2H)+2 | C192H260N30O102 | 574.8    | 2308.79947 | 2308.80346 | -1.73     |

Figure S18: HRMS spectrum (<sup>+</sup>ESI) for compound 11.

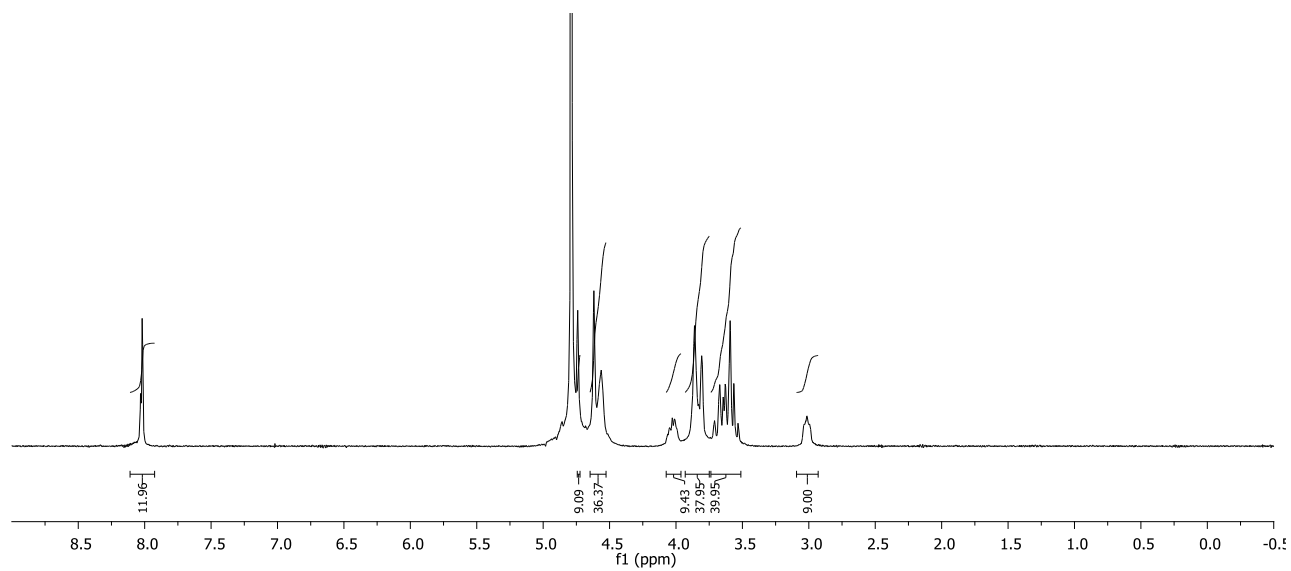

**Figure S19:**  $^1\text{H}$  NMR spectrum of compound **12** ( $\text{D}_2\text{O}$ , 300 MHz).

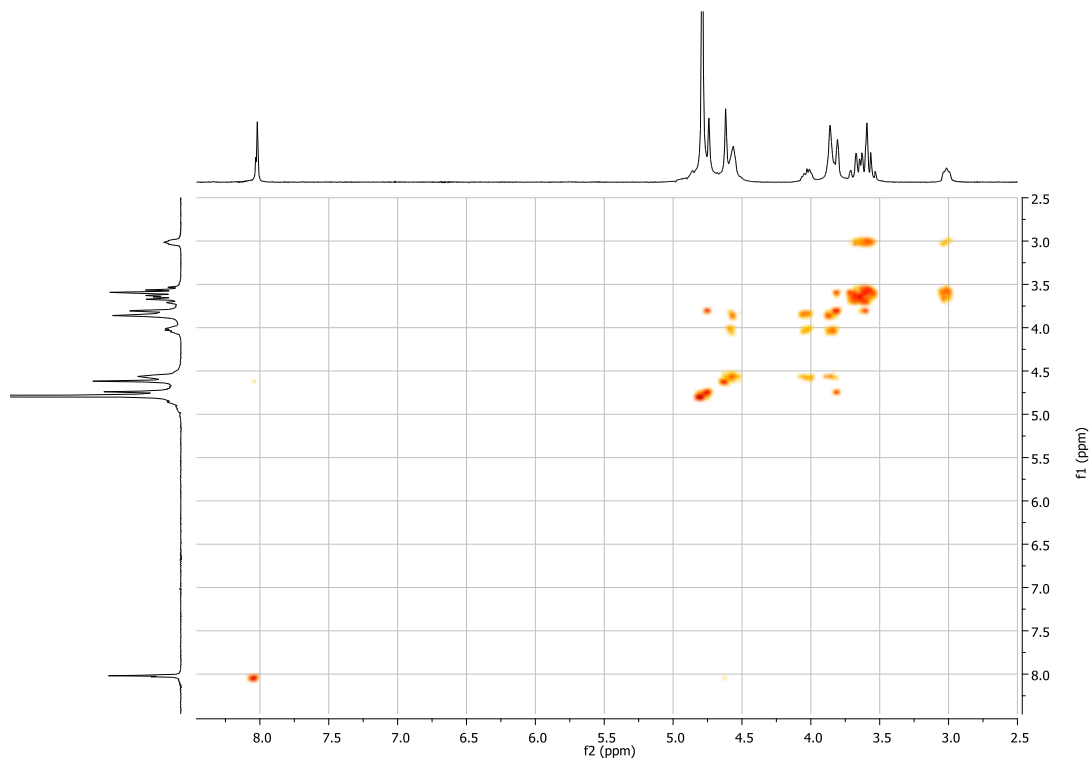

**Figure S20:** COSY spectrum for compound **12**.

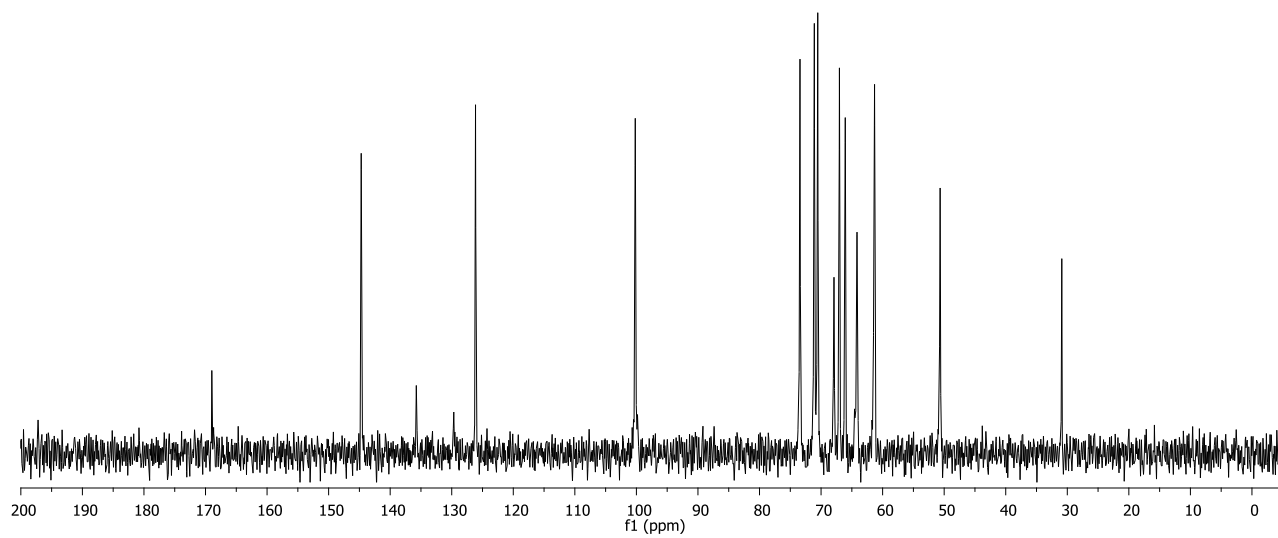

**Figure S21:**  $^{13}\text{C}$  NMR spectrum of compound **12** ( $\text{D}_2\text{O}$ , 75 MHz).

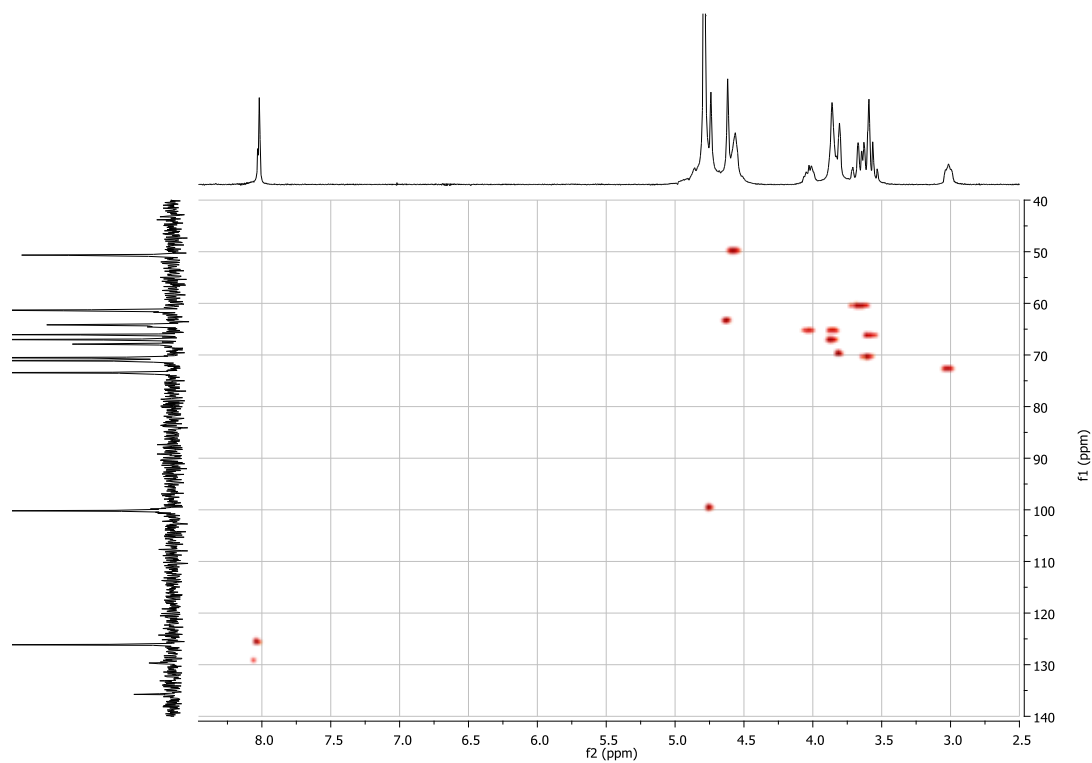

**Figure S22:** HSQC spectrum for compound **12**.

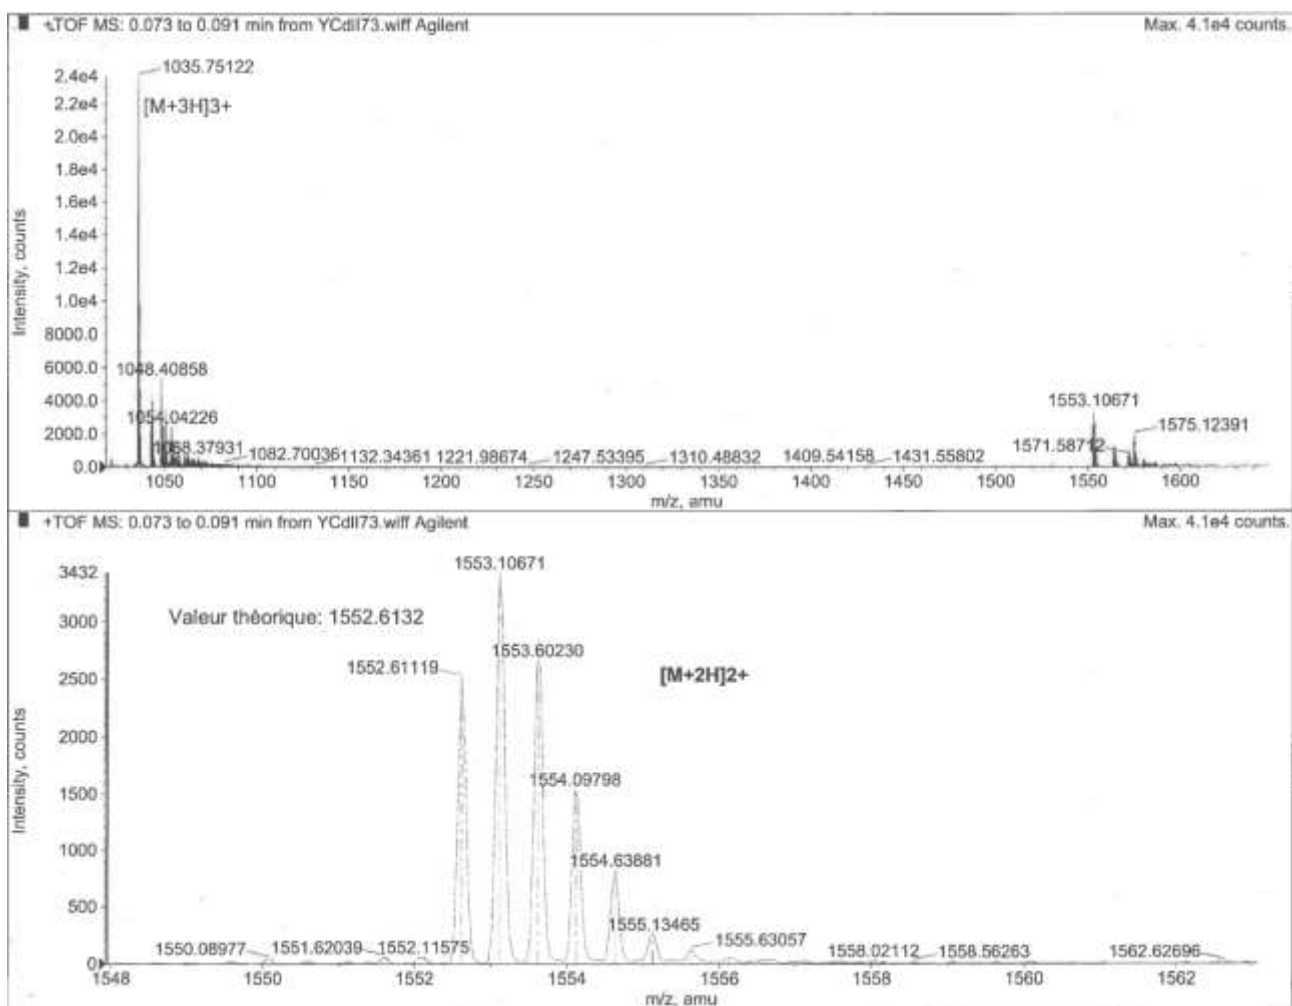

**Figure S23:** HRMS spectrum (<sup>+</sup>TOF) for compound **12**.

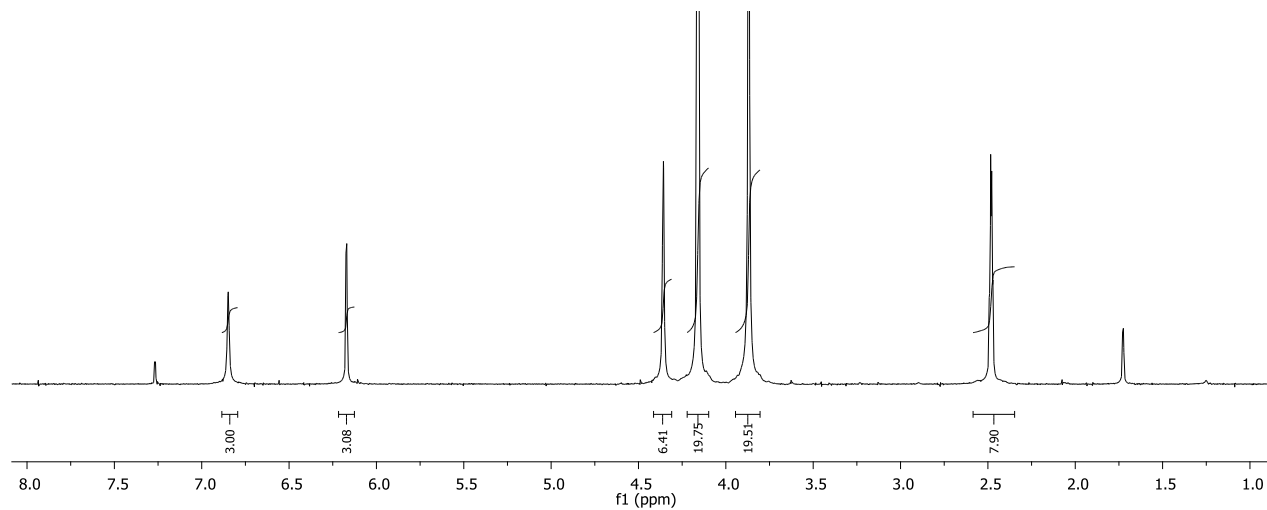

**Figure S24:** <sup>1</sup>H NMR spectrum of compound **15** (CDCl<sub>3</sub>, 300 MHz).

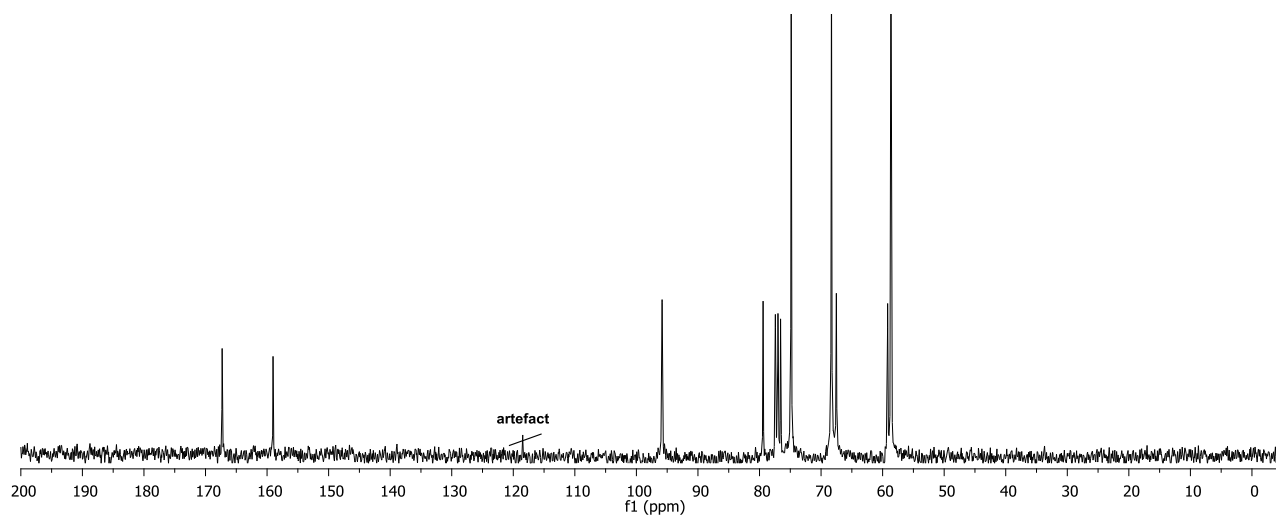

**Figure S25:** <sup>13</sup>C NMR spectrum of compound **15** (CDCl<sub>3</sub>, 75 MHz).

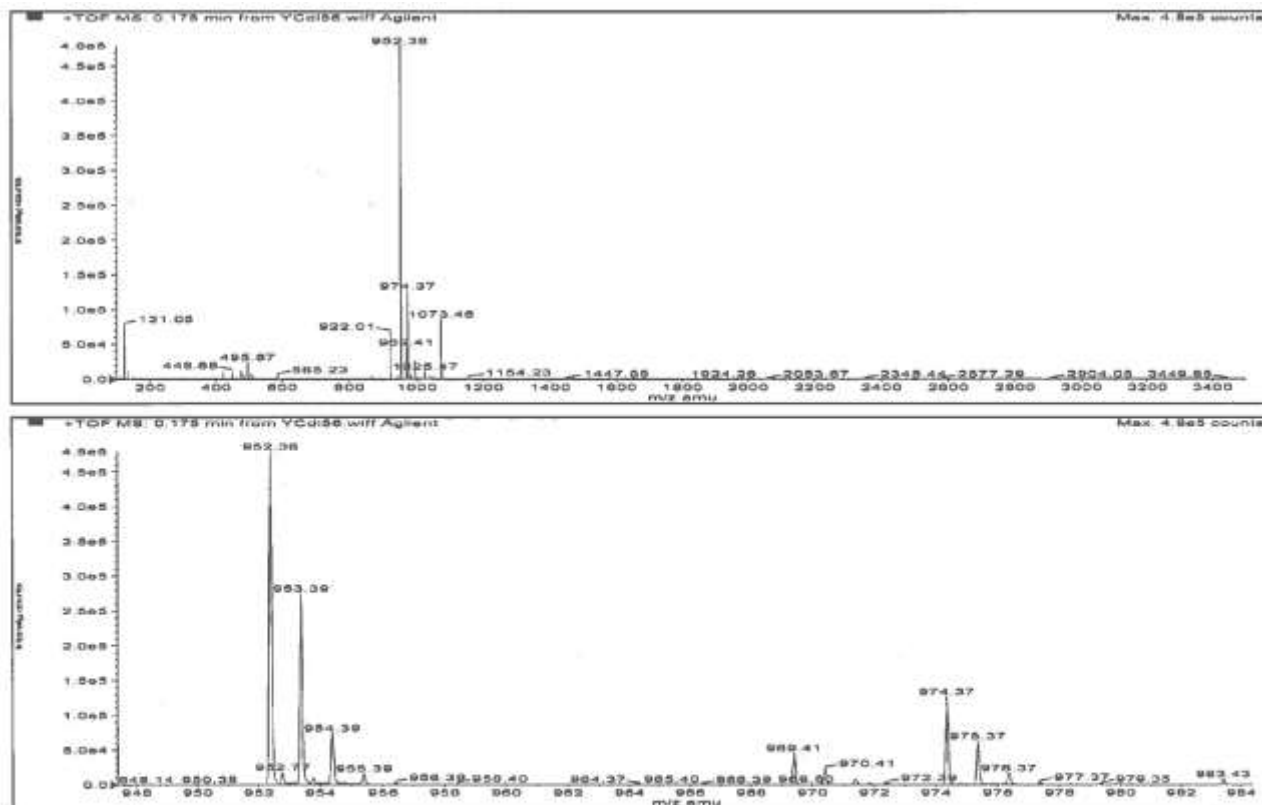

| Formula     | Compound name | Mass      | Peak RT (min) | Peak area  | Description |
|-------------|---------------|-----------|---------------|------------|-------------|
| C51H57N3O15 | --            | 951.37897 | 0.12          | 4.67661 E7 | --          |

| Species             | Abundance (counts) | Ion Mass  | Measured Mass | Error (mDa) | Error (ppm) | Ret. Time Error (min) |
|---------------------|--------------------|-----------|---------------|-------------|-------------|-----------------------|
| [M+H] <sup>+</sup>  | 492252.28          | 952.38624 | 952.38425     | -1.99939    | -2.10       | --                    |
| [M+Na] <sup>+</sup> | 128015.10          | 974.36819 | 974.36619     | -1.99496    | -2.05       | --                    |

Figure S26: HRMS (<sup>+</sup>TOF) spectra and report for compound 15.

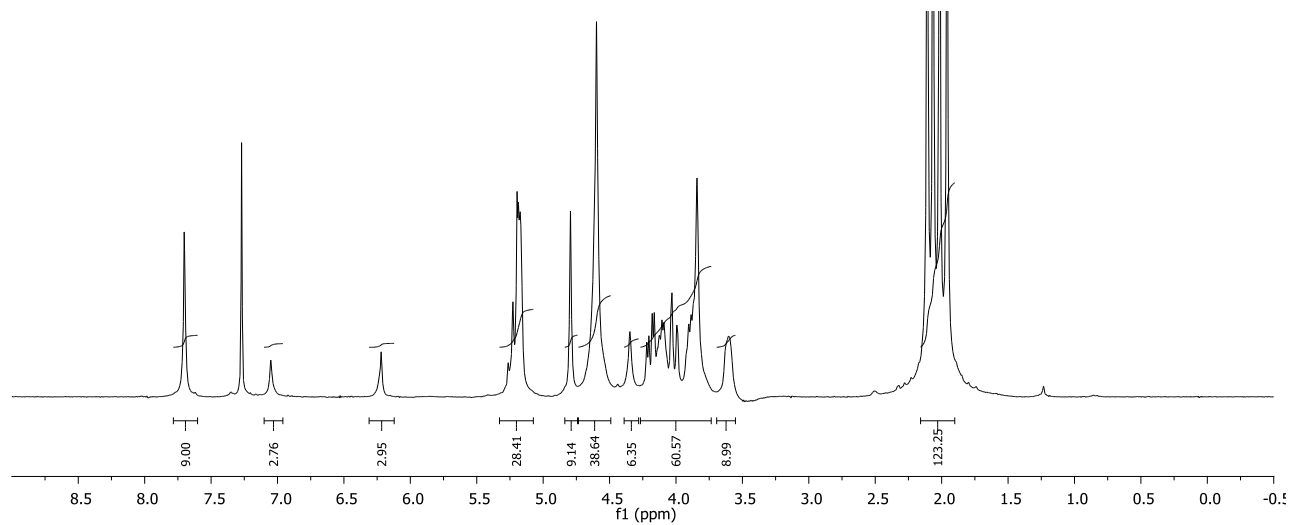

**Figure S27:** <sup>1</sup>H NMR spectrum of compound **16** (CDCl<sub>3</sub>, 300 MHz).

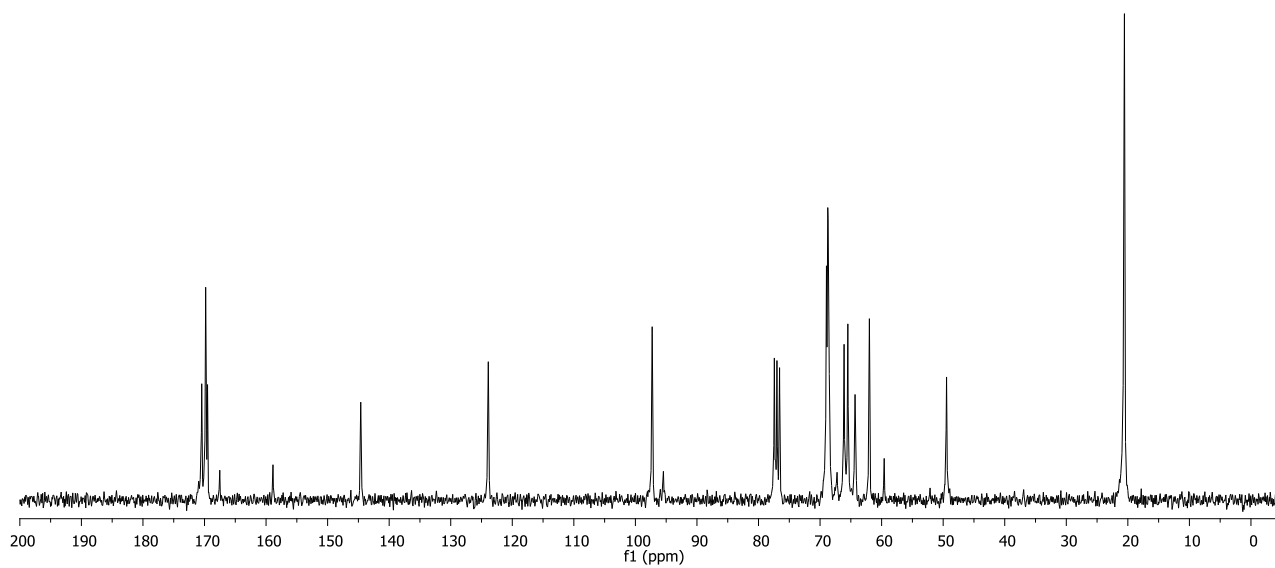

**Figure S28:** <sup>13</sup>C NMR spectrum of compound **16** (CDCl<sub>3</sub>, 75 MHz).

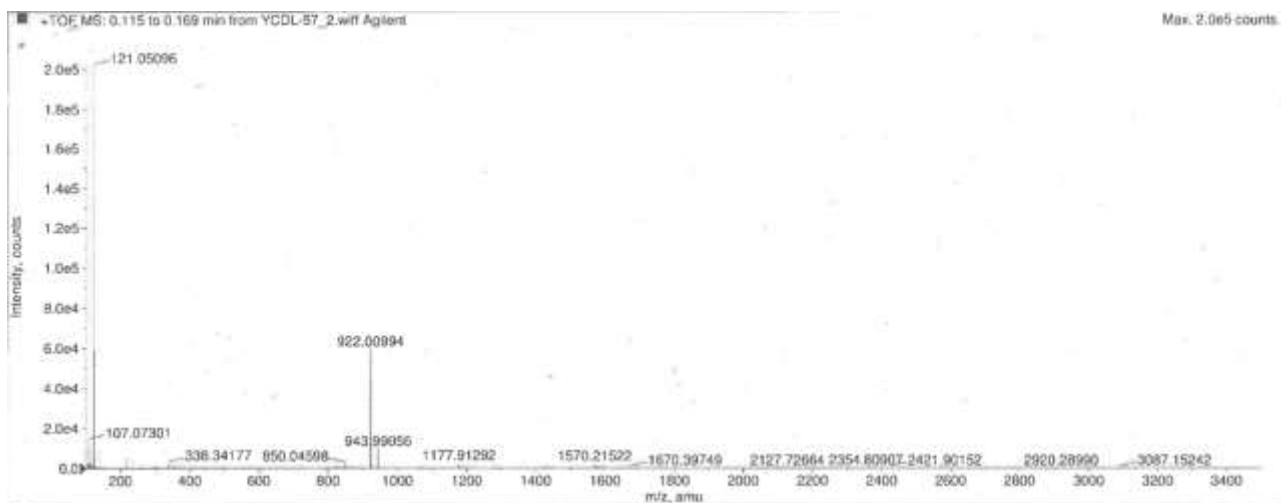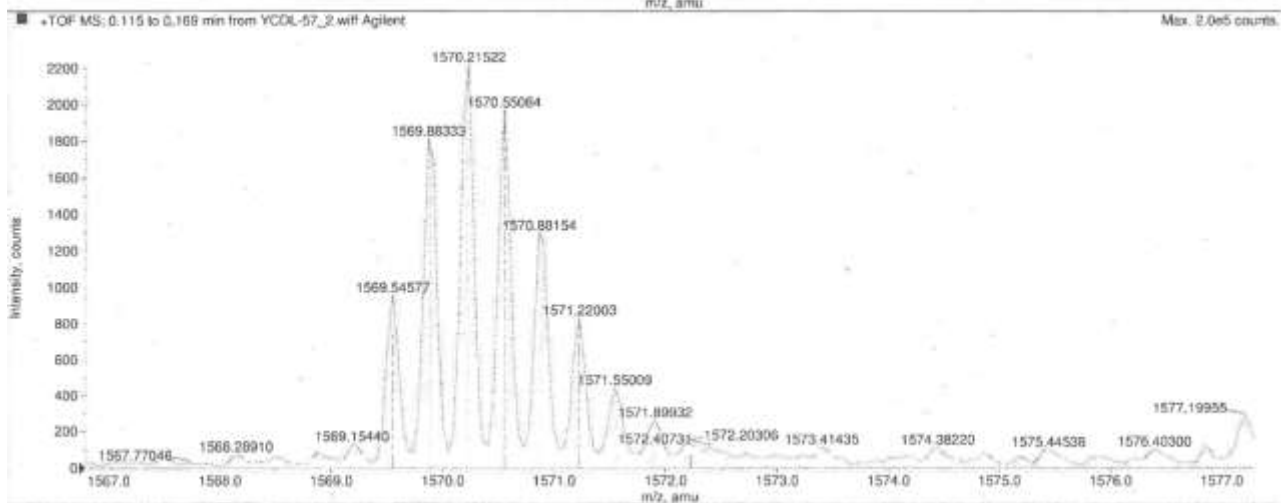

#### Elemental composition calculator

Target m/z: +1569.5458 amu  
Tolerance: +1000.0000 ppm  
Result type: Elemental  
Max num of results: 500  
Min DBE: -0.5000 Max DBE: +3000.0000  
Electron state: OddAndEven  
Max of charges: 3  
Add water: N/A  
Add proton: N/A  
File Name: YCDL-57\_2.wiff

|   | Elements | Min Number | Max Number |
|---|----------|------------|------------|
| 1 | C        | 195        | 195        |
| 2 | H        | 200        | 400        |
| 3 | N        | 30         | 30         |
| 4 | O        | 105        | 105        |

|   | Formula            | Calculated m/z (amu) | mDa Error | PPM Error | DBE  |
|---|--------------------|----------------------|-----------|-----------|------|
| 1 | C195 H267 N30 O105 | 1569.54863           | -0.98737  | -3.82374  | 77.5 |

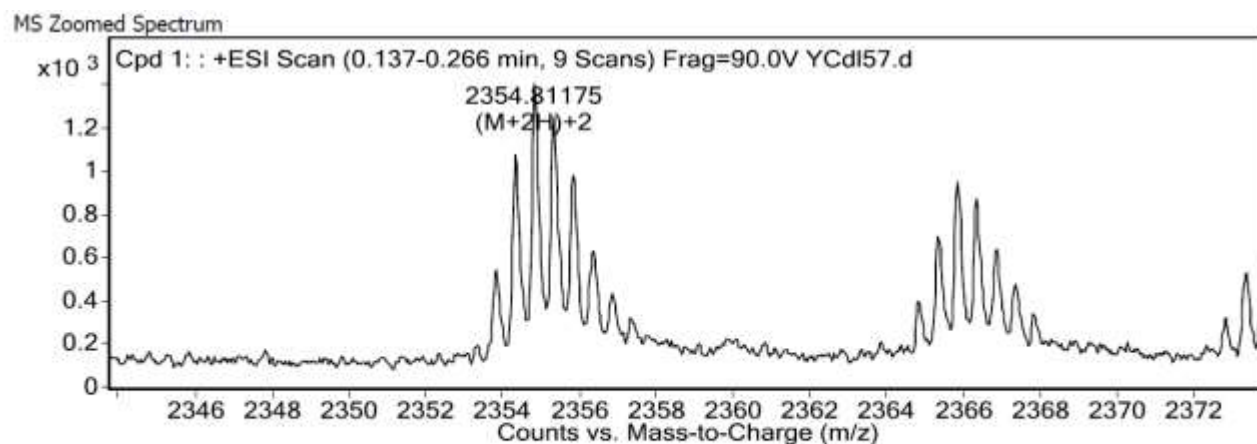

MS Spectrum Peak List

| Ion      | Ion Formula     | Abund    | Expe. m/z  | Calc. m/z  | Diff(ppm) |
|----------|-----------------|----------|------------|------------|-----------|
|          |                 | 716610.1 | 134.11769  |            |           |
| (M+2H)+2 | C195H266N30O105 | 477.8    | 2353.80877 | 2353.81931 | -4.48     |

Figure S29: HRMS ( $^1\text{TOF}$  (up) and  $^1\text{ESI}$  (bottom)) and reports for compound **16**.

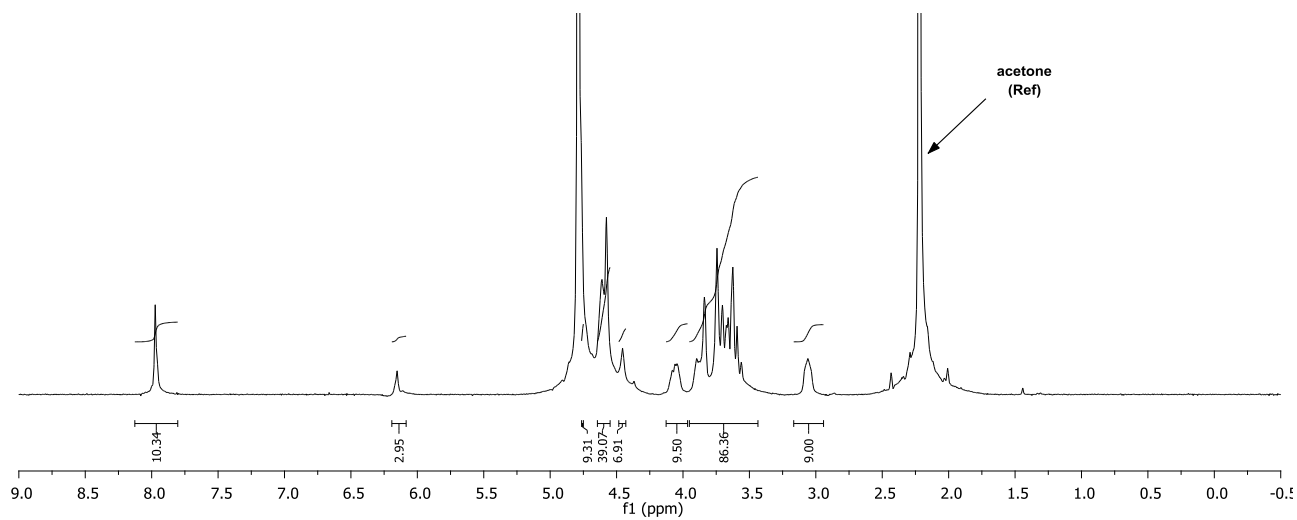

**Figure S30:**  $^1\text{H}$  NMR spectrum of compound **17** ( $\text{D}_2\text{O}$ , 300 MHz).

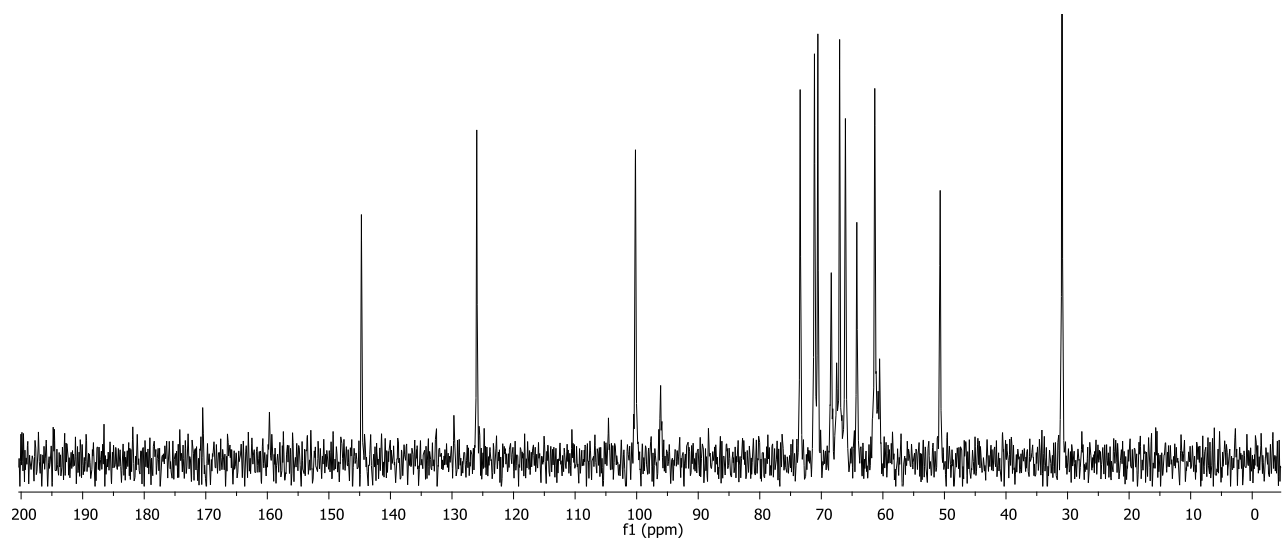

**Figure S31:**  $^{13}\text{C}$  NMR spectrum of compound **17** ( $\text{D}_2\text{O}$ , 75 MHz).

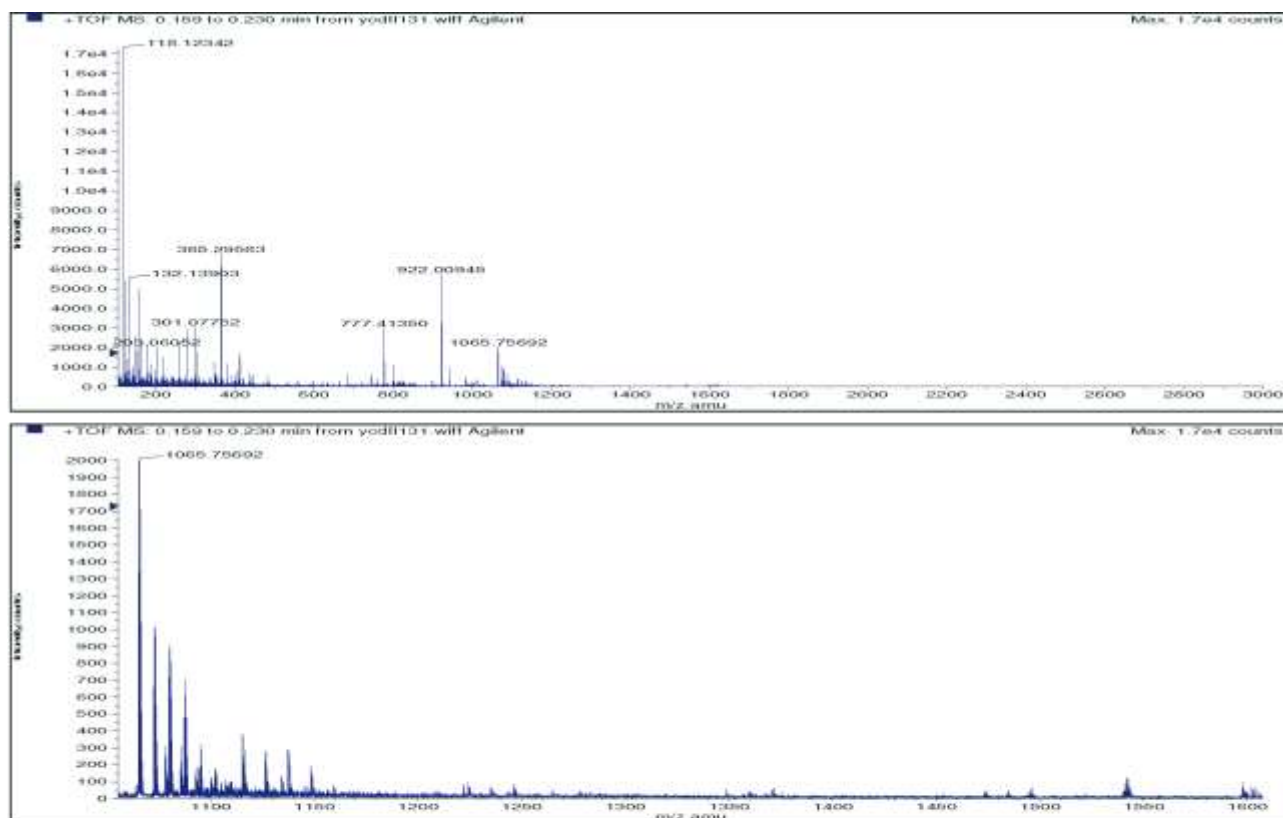

| Formula        | Compound name | Mass       | Peak RT (min) | Peak area  | Description |
|----------------|---------------|------------|---------------|------------|-------------|
| C123H192N30O69 | --            | 3193.24374 | 0.19          | 1.42094 E4 | --          |

| Species              | Abundance (counts) | Ion Mass   | Measured Mass | Error (mDa) | Error (ppm) | Ret. Time Error (min) |
|----------------------|--------------------|------------|---------------|-------------|-------------|-----------------------|
| [M+3H] <sup>3+</sup> | 1361.61            | 1065.42185 | 1065.42210    | 0.24650     | 0.23        | --                    |

Figure S32: HRMS (<sup>1</sup>TOF) spectrum for compound **17**.

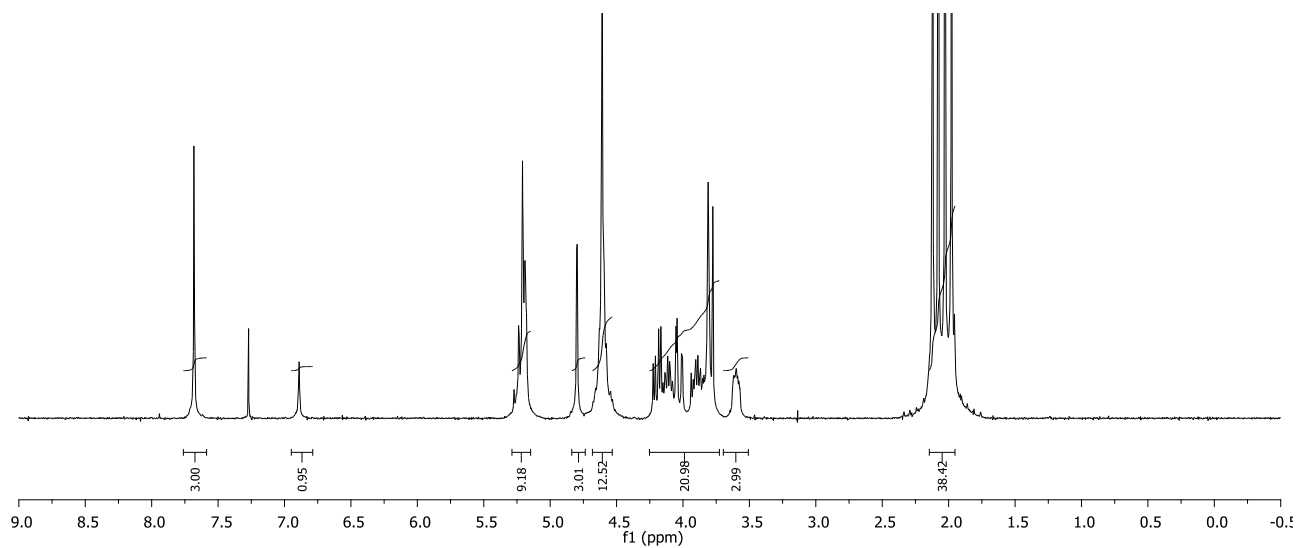

**Figure S33:** <sup>1</sup>H NMR spectrum of compound **18** (CDCl<sub>3</sub>, 300 MHz).

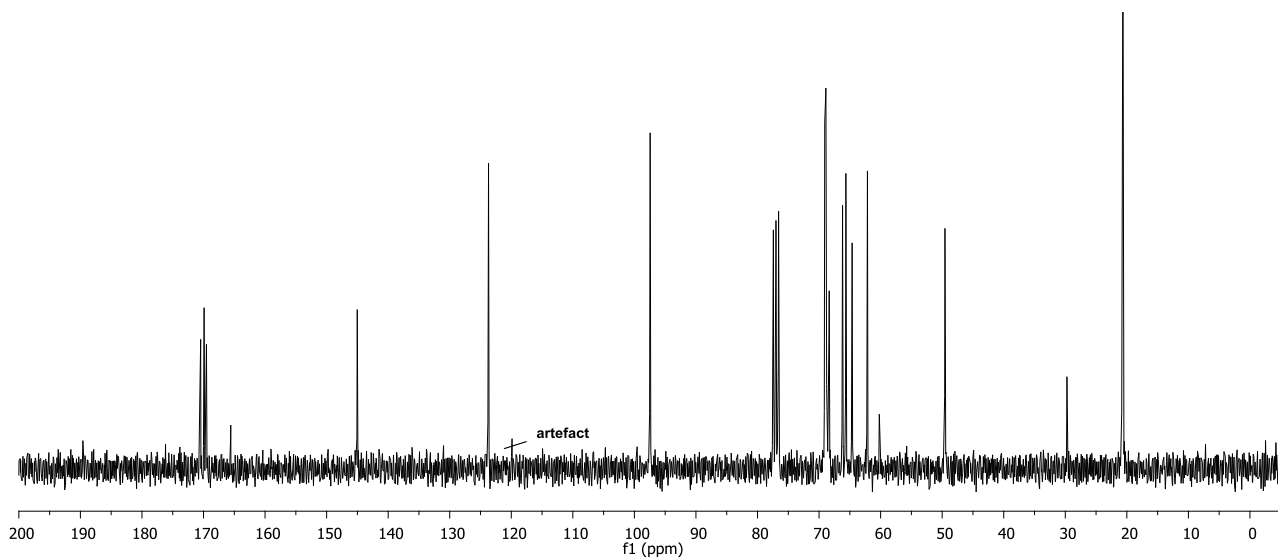

**Figure S34:** <sup>13</sup>C NMR spectrum of compound **18** (CDCl<sub>3</sub>, 75 MHz).

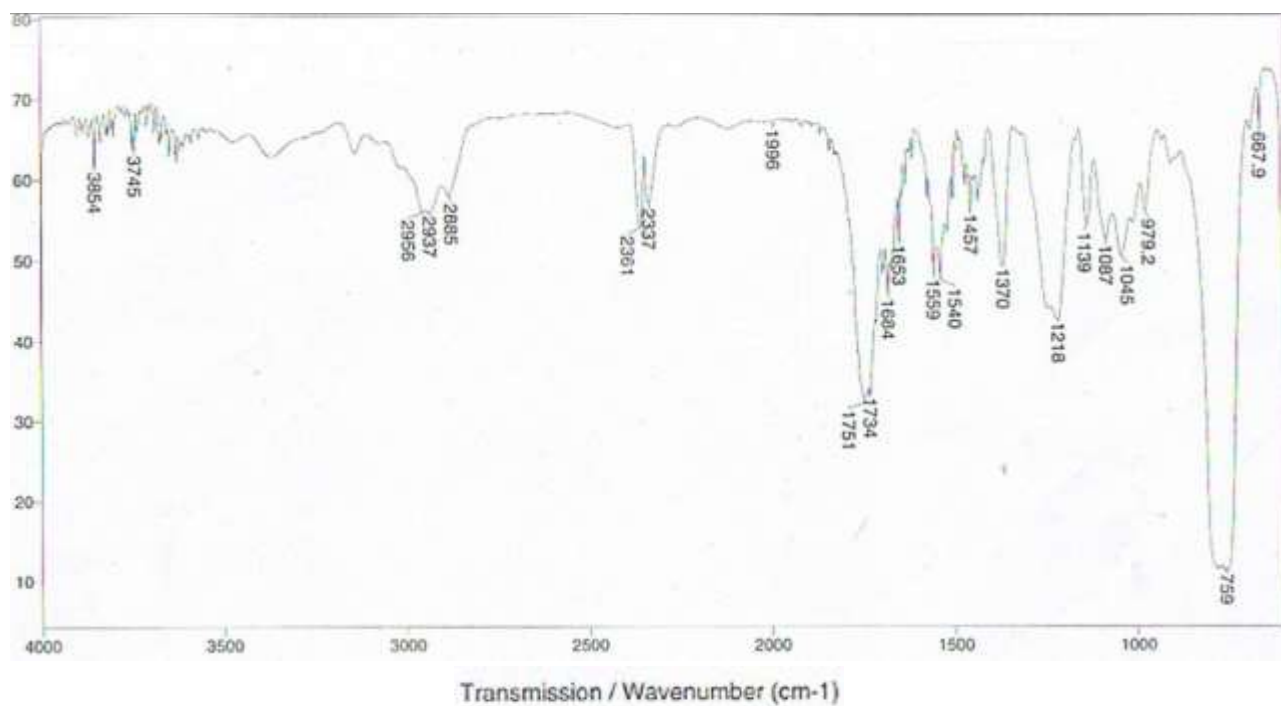

**Figure S35:** IR spectrum of compound **18**.

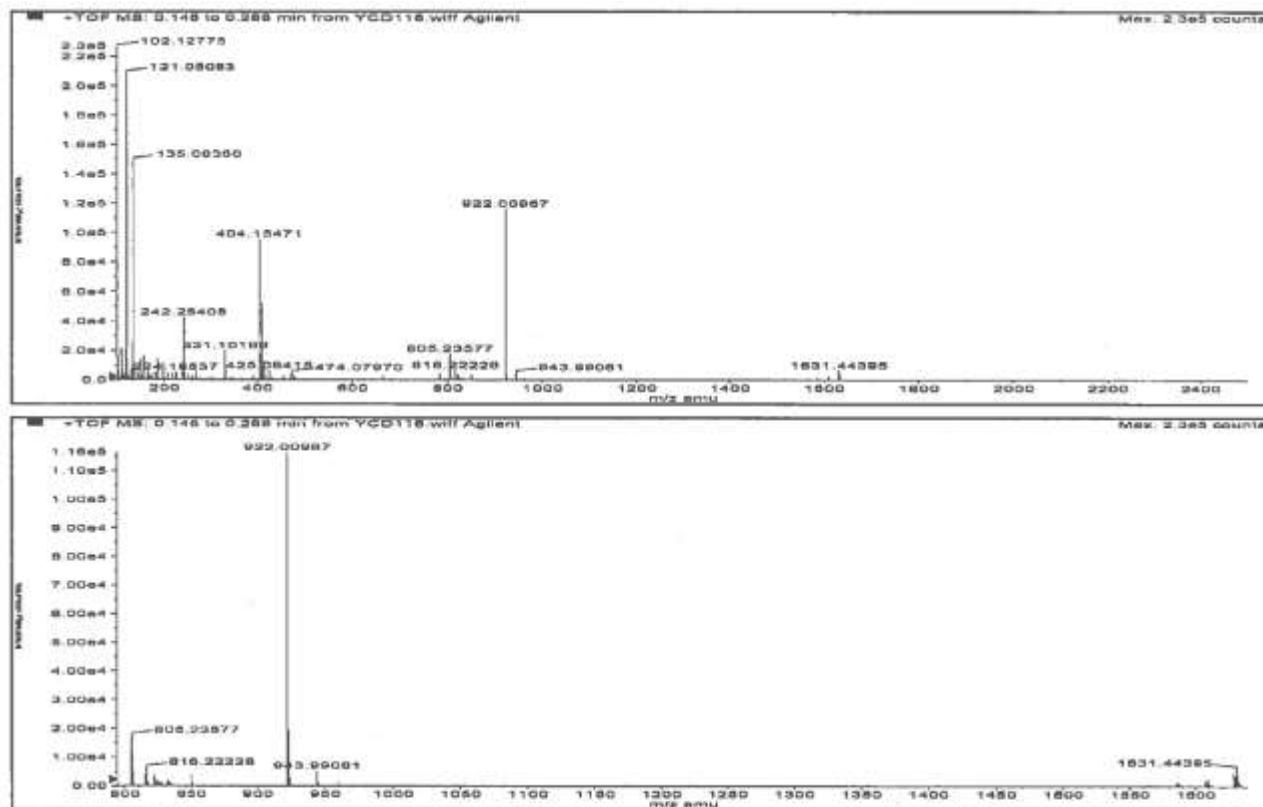

| Formula        | Compound name | Mass       | Peak RT (min) | Peak area  | Description |
|----------------|---------------|------------|---------------|------------|-------------|
| C63H87BrN10O34 | —             | 1606.45695 | 0.18          | 5.45742 E5 | —           |

| Species              | Abundance (counts) | Ion Mass   | Measured Mass | Error (mDa) | Error (ppm) | Ret. Time Error (min) |
|----------------------|--------------------|------------|---------------|-------------|-------------|-----------------------|
| [M+2H] <sup>2+</sup> | 14787.14           | 804.23575  | 804.23561     | -0.14429    | -0.18       | —                     |
| [M+H] <sup>+</sup>   | 2036.89            | 1607.46423 | 1607.46204    | -2.19006    | -1.36       | —                     |
| [M+Na] <sup>+</sup>  | 4716.23            | 1629.44617 | 1629.44480    | -1.37214    | -0.84       | —                     |

**Figure S36:** HRMS (<sup>1</sup>TOF) spectrum and report for compound **18**.

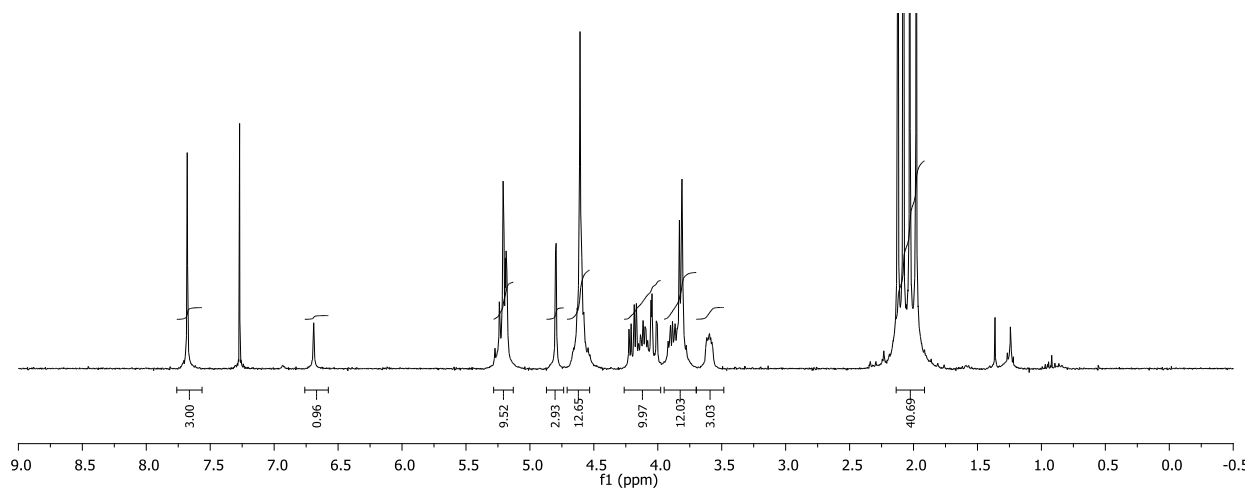

**Figure S37:**  $^1\text{H}$  NMR spectrum of compound **19** ( $\text{CDCl}_3$ , 300 MHz).

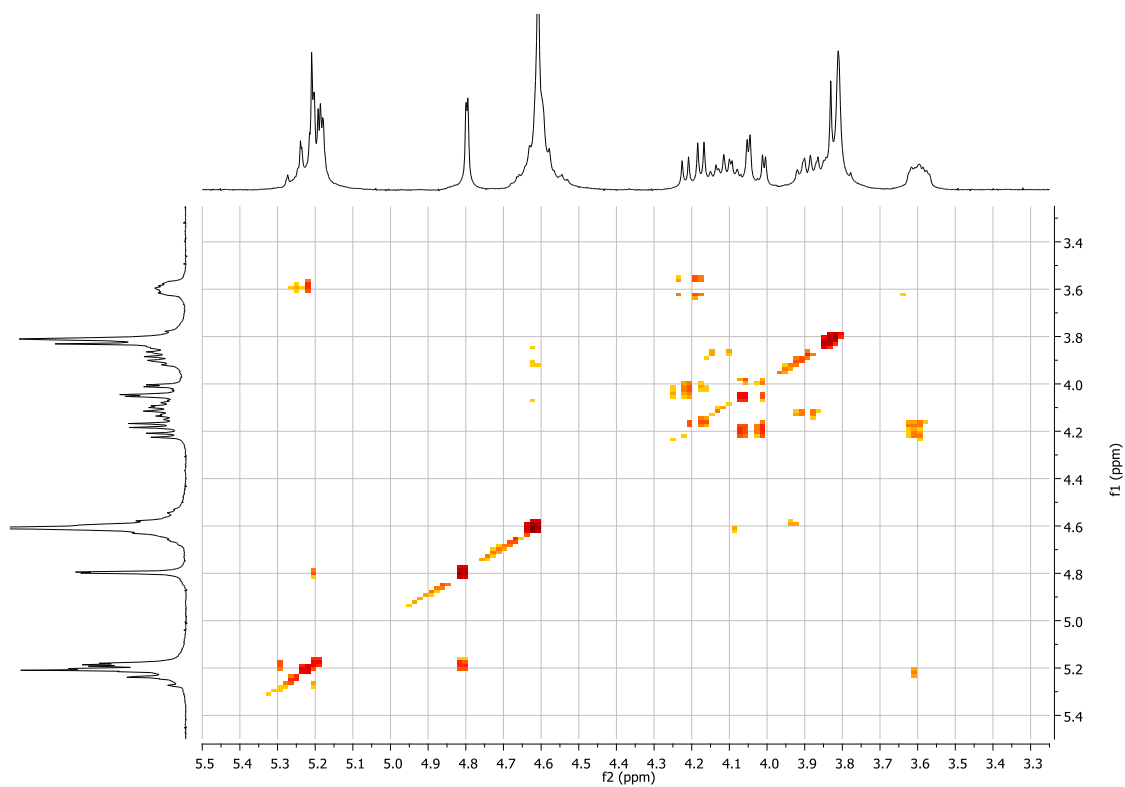

**Figure S38:** COSY spectrum of compound **19**.

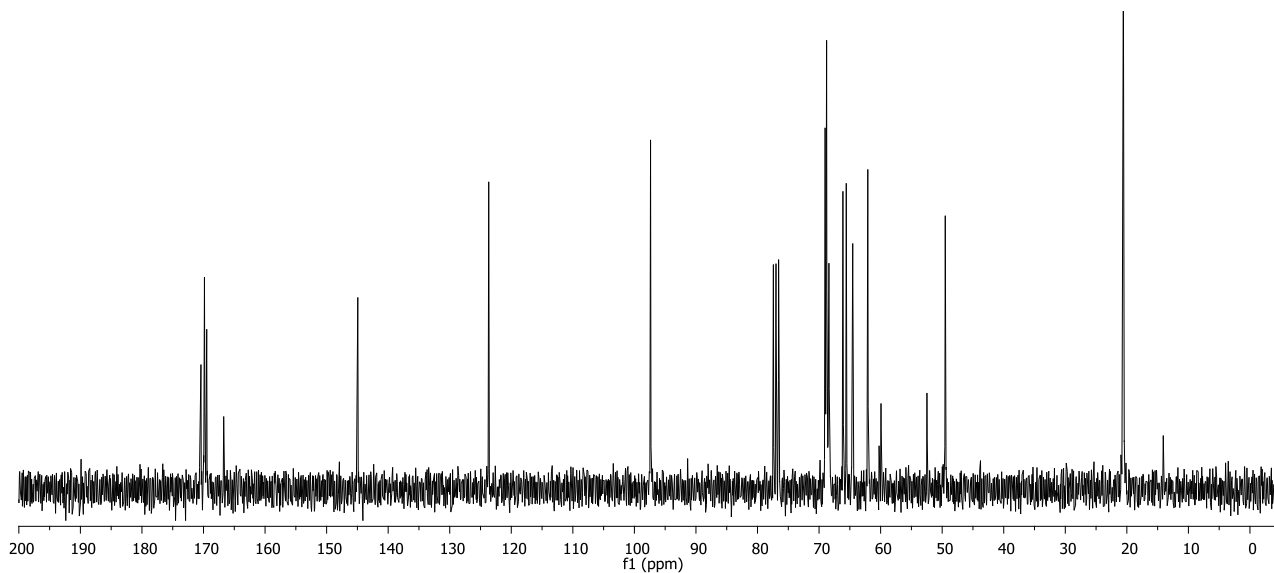

**Figure S39:**  $^{13}\text{C}$  NMR spectrum of compound **19** ( $\text{CDCl}_3$ , 75 MHz).

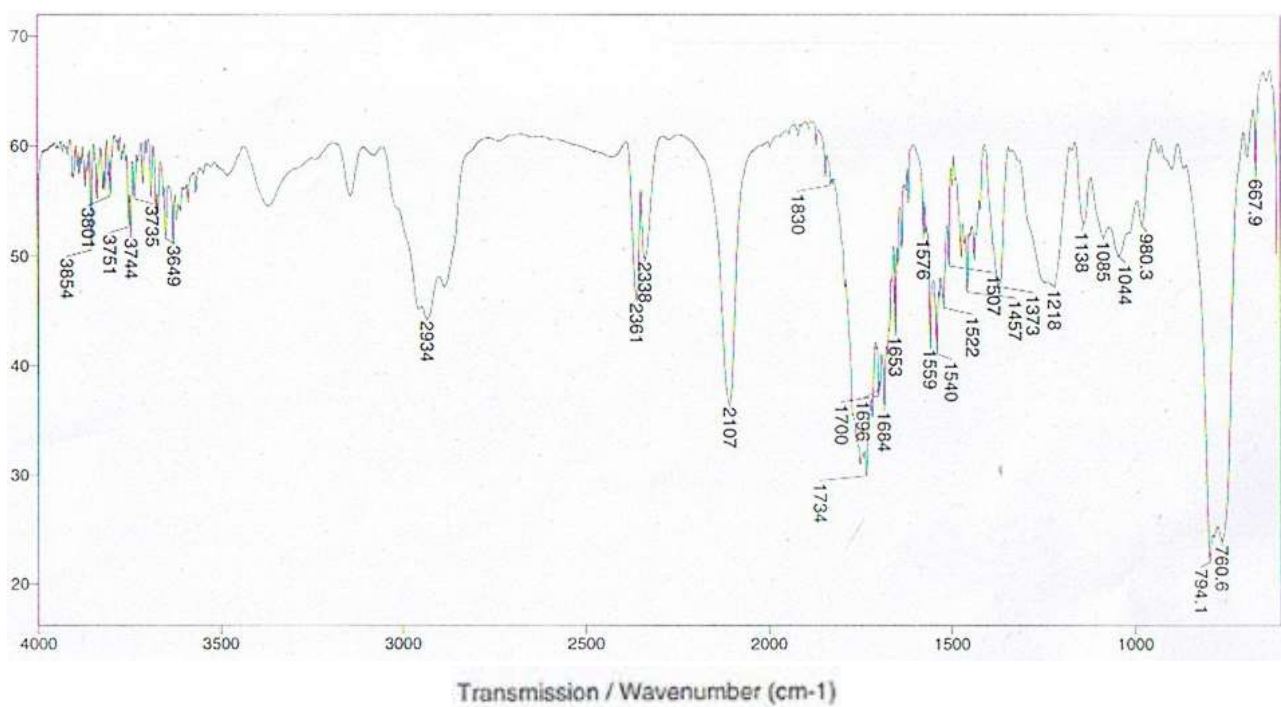

**Figure S40:** IR spectrum of compound **19**.

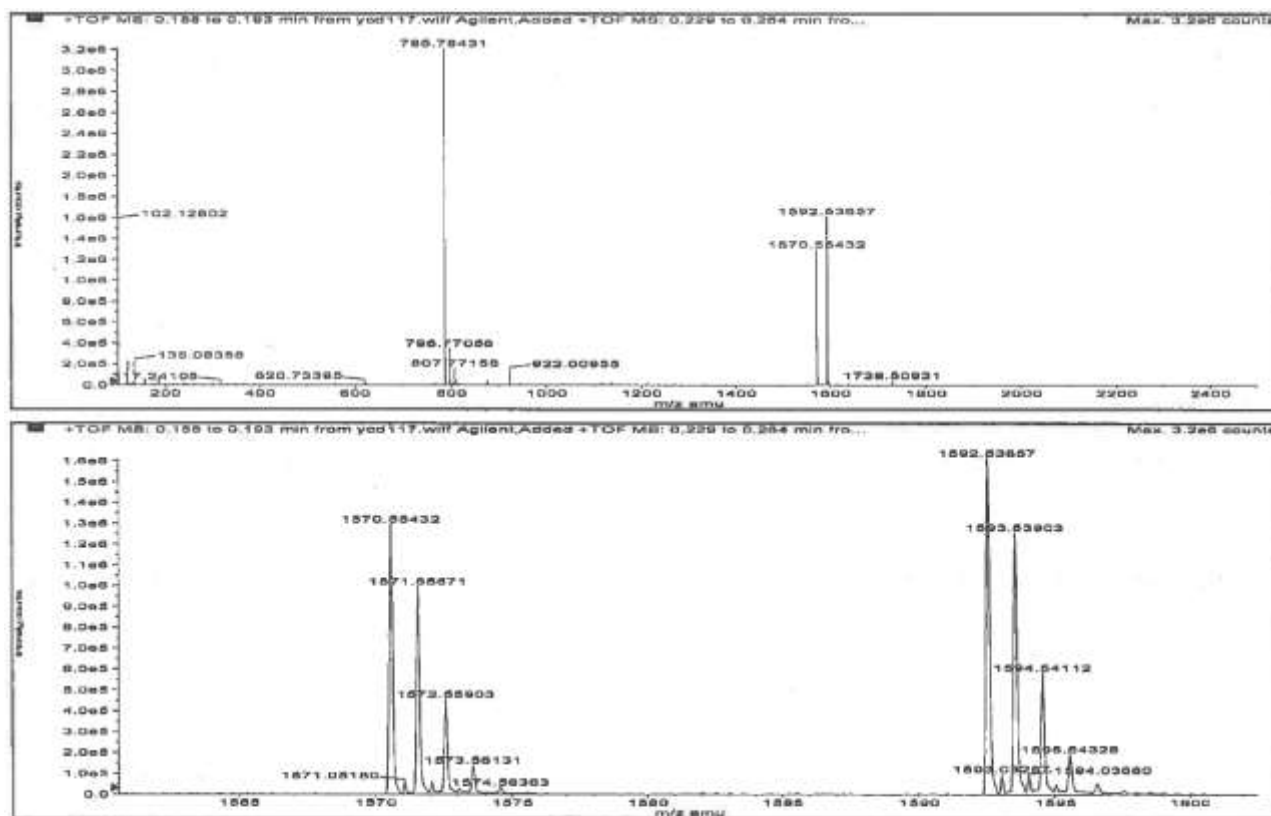

| Formula                                                         | Compound name | Mass       | Peak RT (min) | Peak area  | Description |
|-----------------------------------------------------------------|---------------|------------|---------------|------------|-------------|
| C <sub>63</sub> H <sub>87</sub> N <sub>13</sub> O <sub>34</sub> | —             | 1569.54764 | 0.19          | 3.68551 E7 | —           |

| Species             | Abundance (counts) | Ion Mass   | Measured Mass | Error (mDa) | Error (ppm) | Ret. Time Error (min) |
|---------------------|--------------------|------------|---------------|-------------|-------------|-----------------------|
| [M+H] <sup>+</sup>  | 1300659.78         | 1570.55511 | 1570.55432    | -0.79404    | -0.51       | —                     |
| [M+Na] <sup>+</sup> | 1666530.91         | 1592.53706 | 1592.53657    | -0.49272    | -0.31       | —                     |

**Figure S41:** HRMS (<sup>+</sup>TOF) trace and report for compound 19.

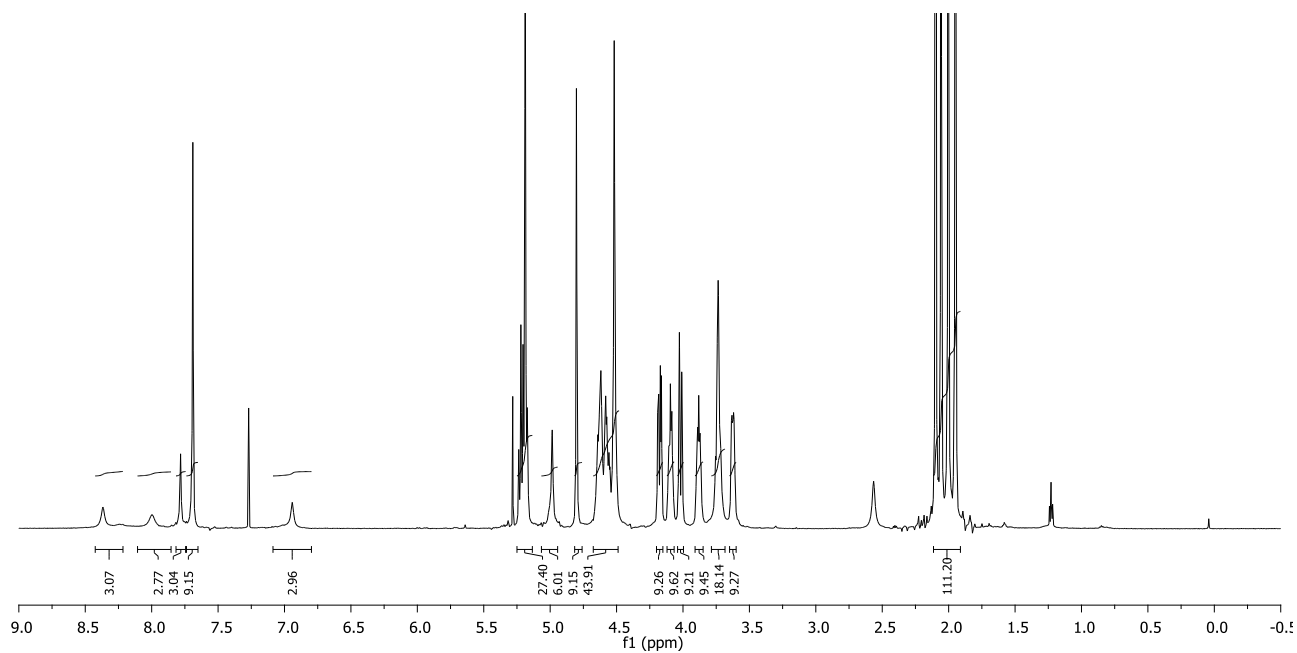

**Figure S42:** <sup>1</sup>H NMR spectrum of compound **20** (CDCl<sub>3</sub>, 600 MHz).

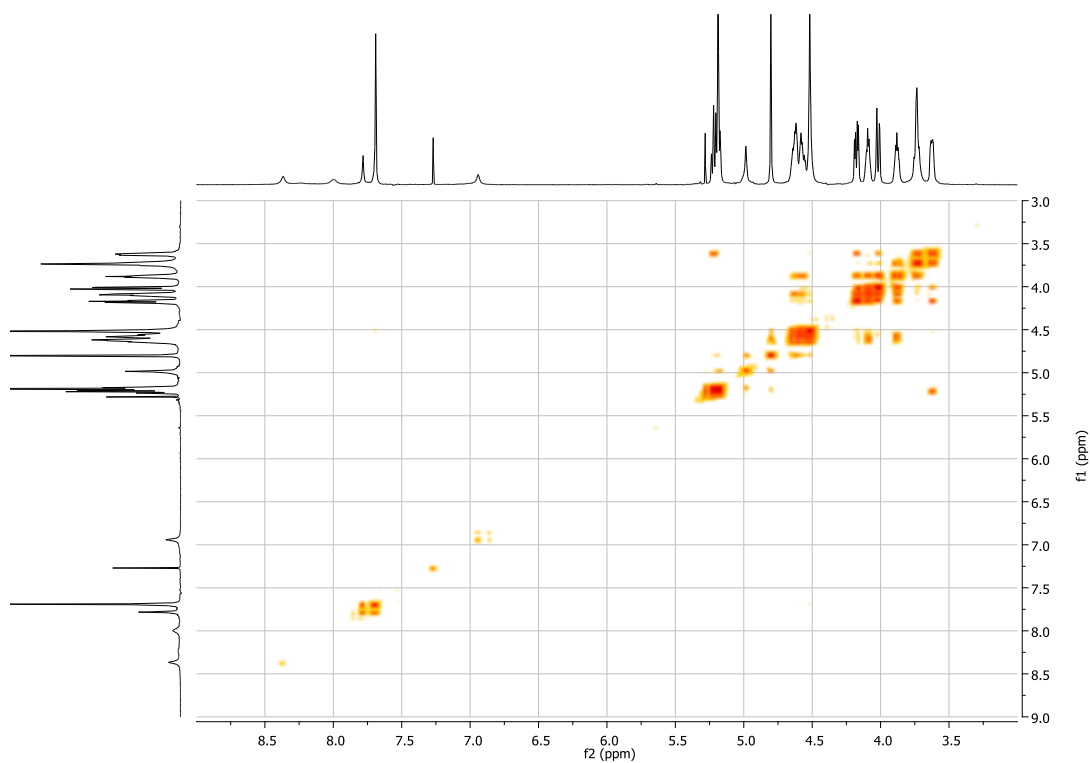

**Figure S43:** COSY spectrum of compound **20**.

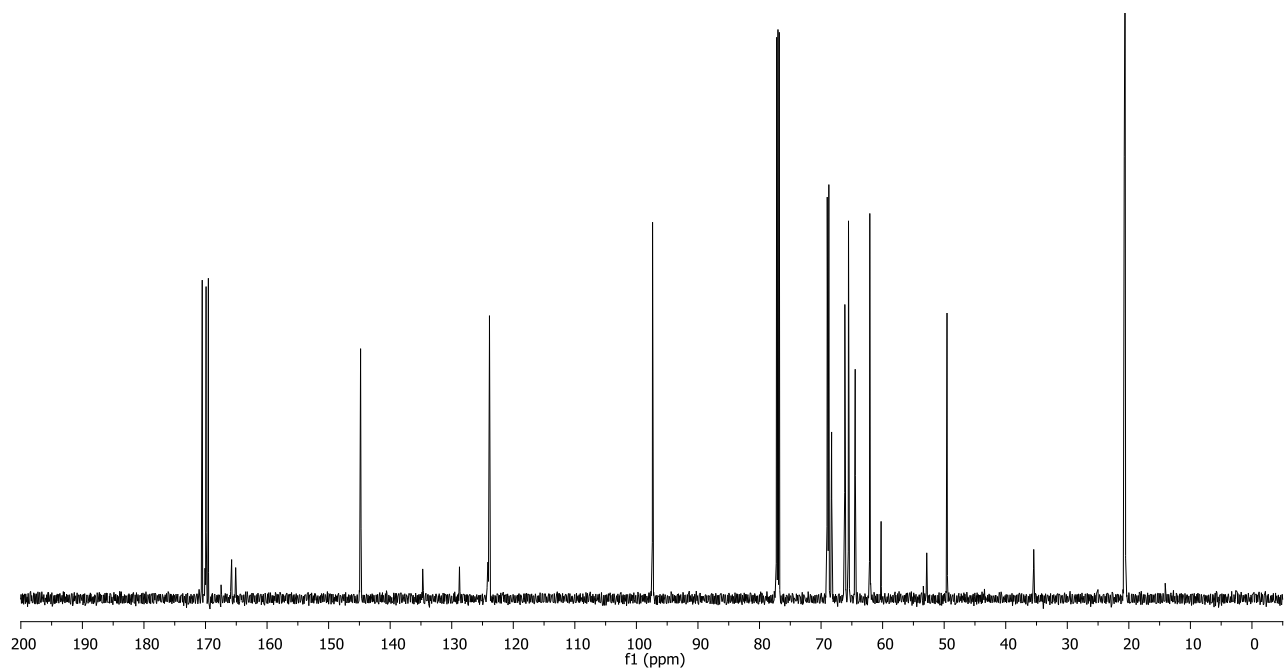

**Figure S44:**  $^{13}\text{C}$  NMR spectrum of compound **20** ( $\text{CDCl}_3$ , 150 MHz).

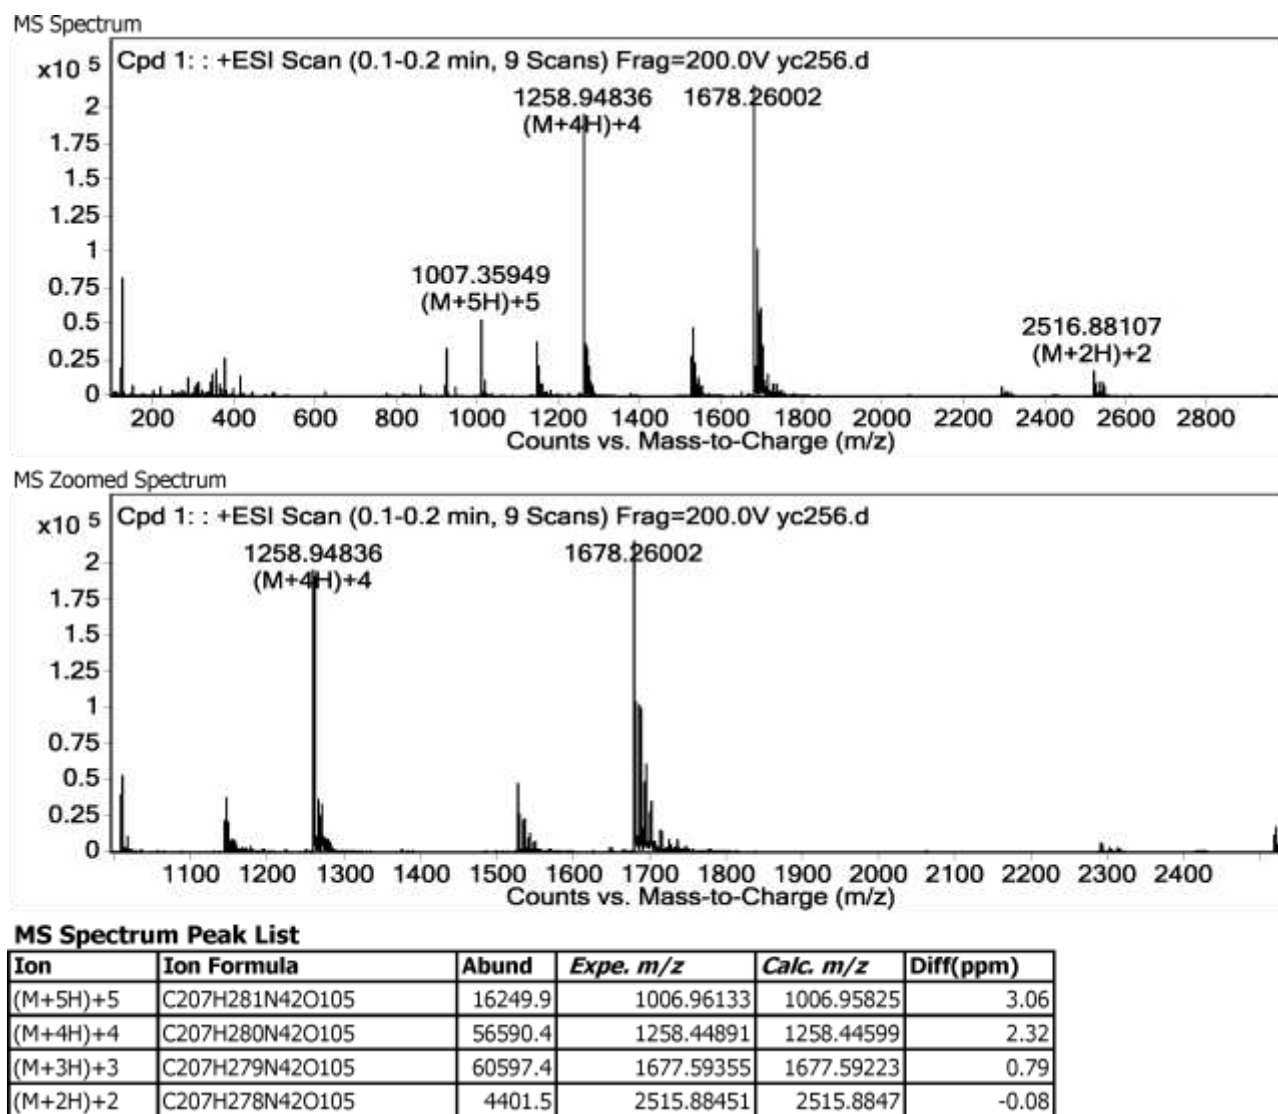

Figure S45: HRMS (<sup>+</sup>ESI) spectrum and report for compound **20**.

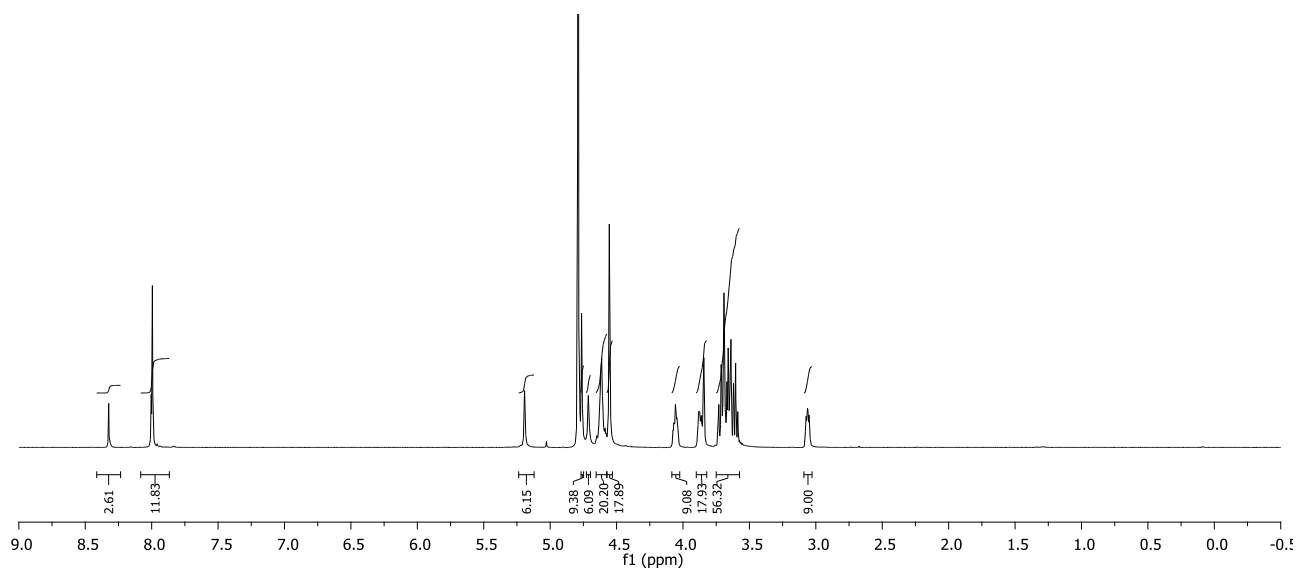

**Figure S46:** <sup>1</sup>H NMR spectrum of compound **21** (D<sub>2</sub>O, 600 MHz).

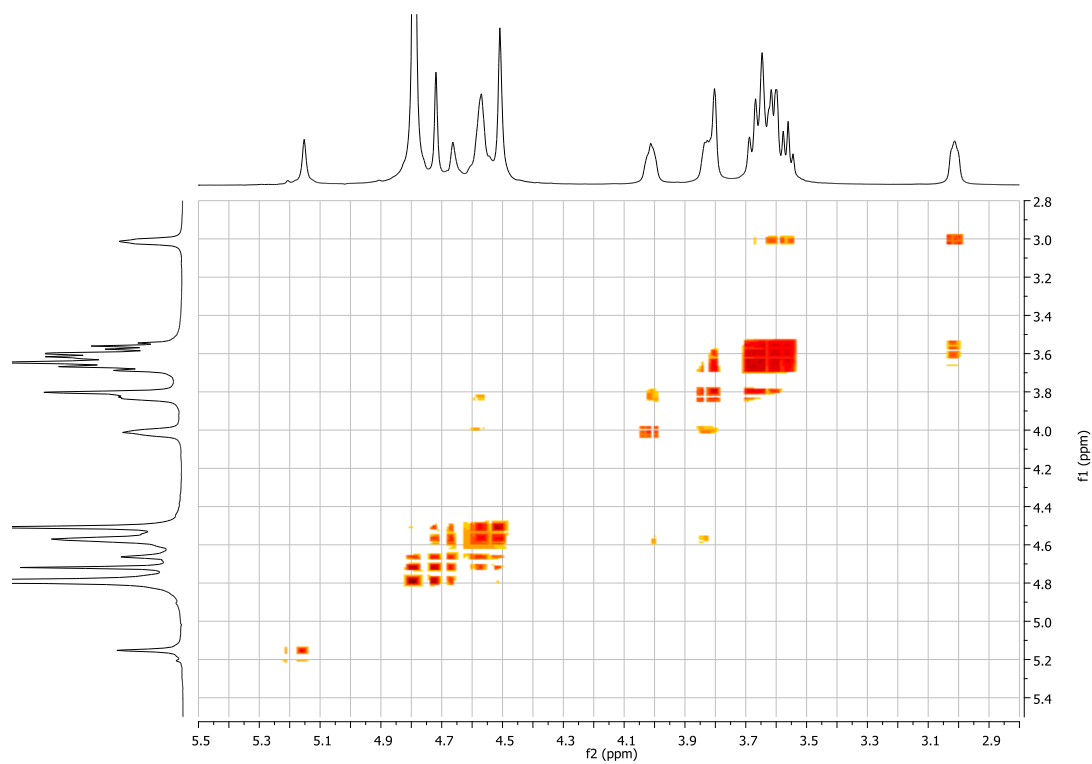

**Figure S47:** COSY spectrum (zoom) of compound **21**.

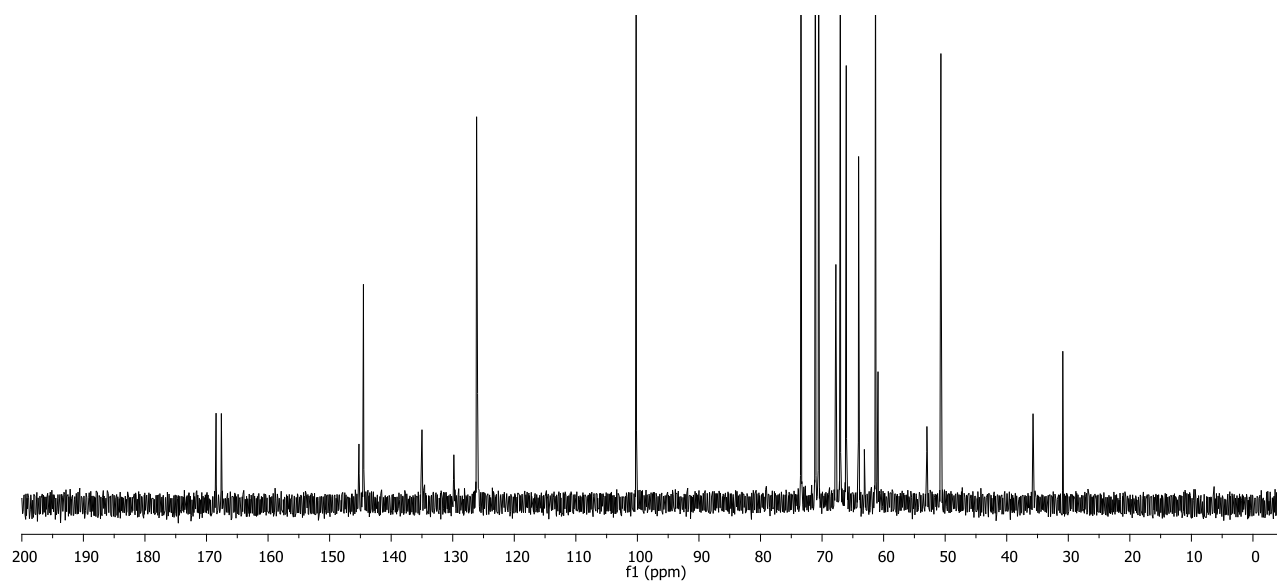

**Figure S48:**  $^{13}\text{C}$  NMR spectrum of compound **21** ( $\text{D}_2\text{O}$ , 150 MHz).

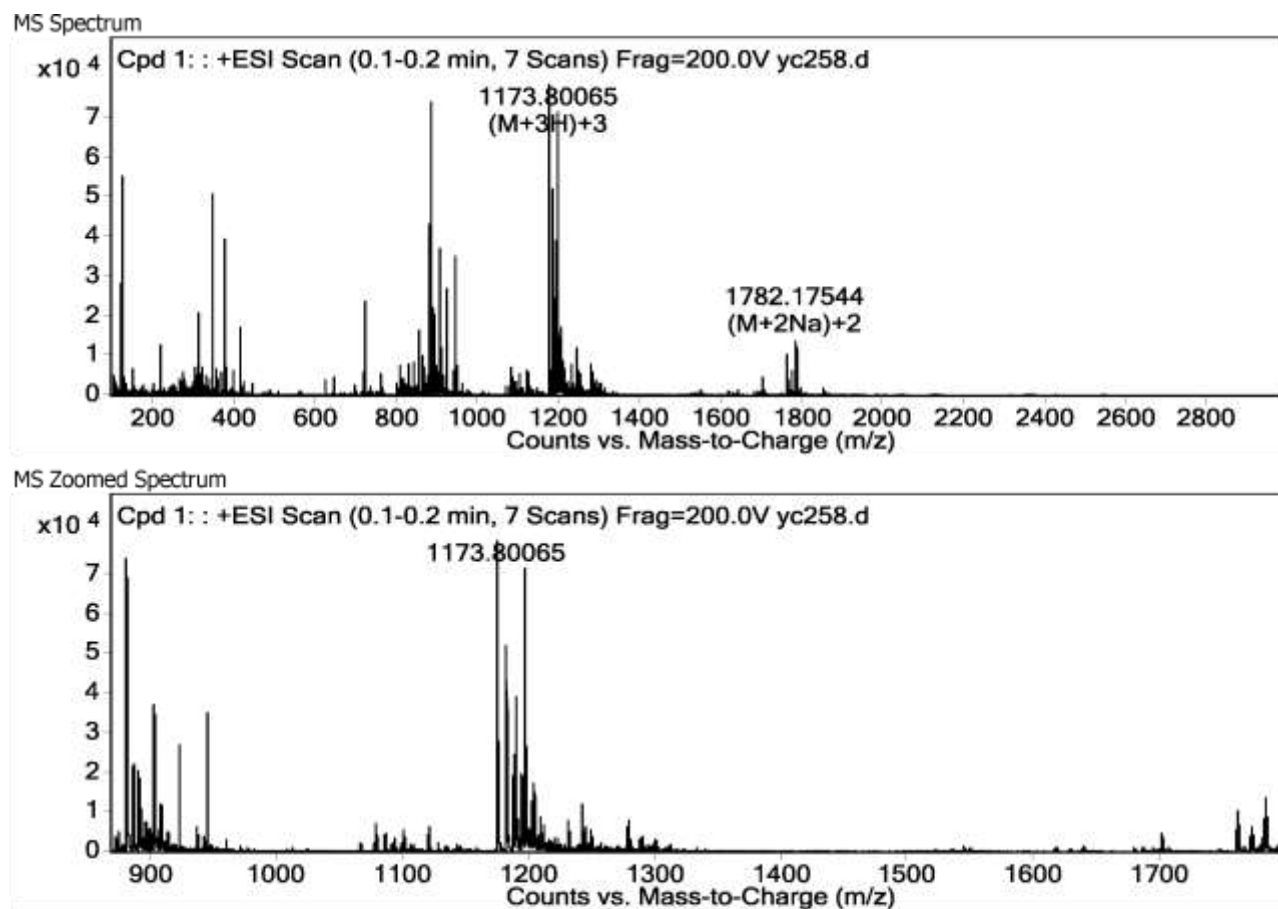

MS Spectrum Peak List

| Ion       | Ion Formula       | Abund   | Expe. m/z  | Calc. m/z  | Diff(ppm) |
|-----------|-------------------|---------|------------|------------|-----------|
| (M+4H)+4  | C135H208N42O69    | 43132.3 | 880.3535   | 880.35091  | 2.95      |
| (M+4Na)+4 | C135H204N42Na4O69 | 21932.4 | 902.33583  | 902.33285  | 3.3       |
| (M+3H)+3  | C135H207N42O69    | 45279.6 | 1173.46714 | 1173.46545 | 1.44      |
| (M+3Na)+3 | C135H204N42Na3O69 | 42774.8 | 1195.44896 | 1195.4474  | 1.31      |
| (M+2H)+2  | C135H206N42O69    | 5484.3  | 1759.69044 | 1759.69454 | -2.33     |
| (M+2Na)+2 | C135H204N42Na2O69 | 8555.1  | 1781.67369 | 1781.67648 | -1.57     |

Figure S49: HRMS (<sup>+</sup>ESI) spectrum of compound 21.

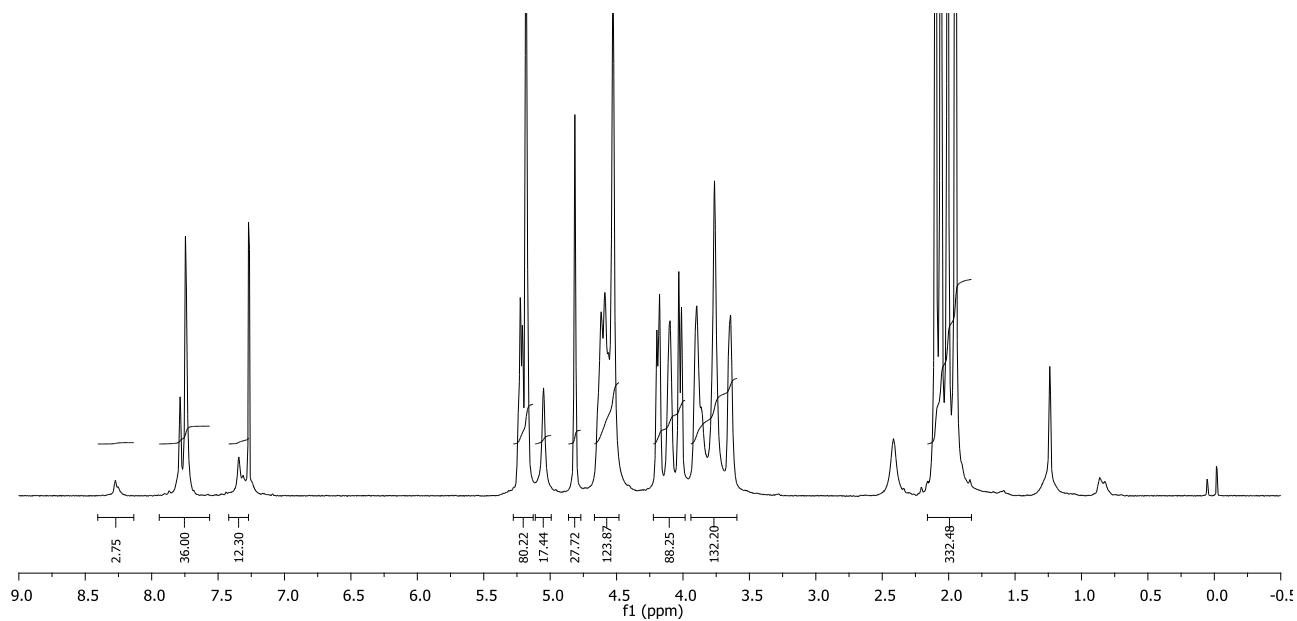

**Figure S50:**  $^1\text{H}$  NMR spectrum of compound **22** ( $\text{CDCl}_3$ , 600 MHz).

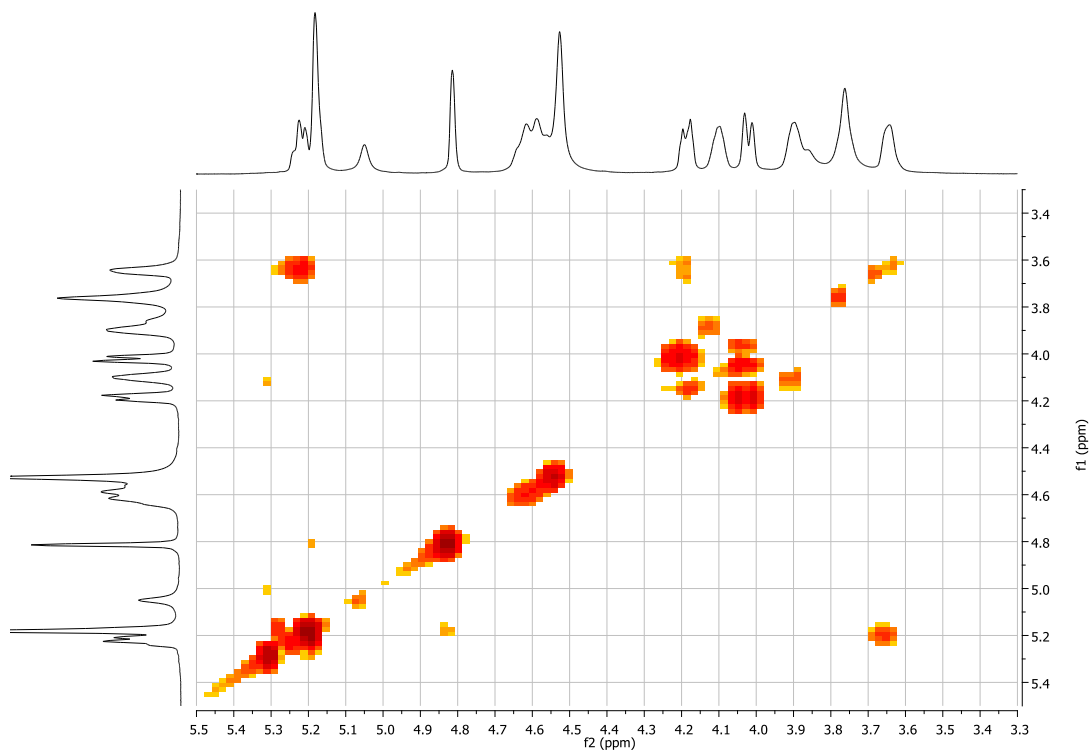

**Figure S51:** COSY spectrum of compound **22**.

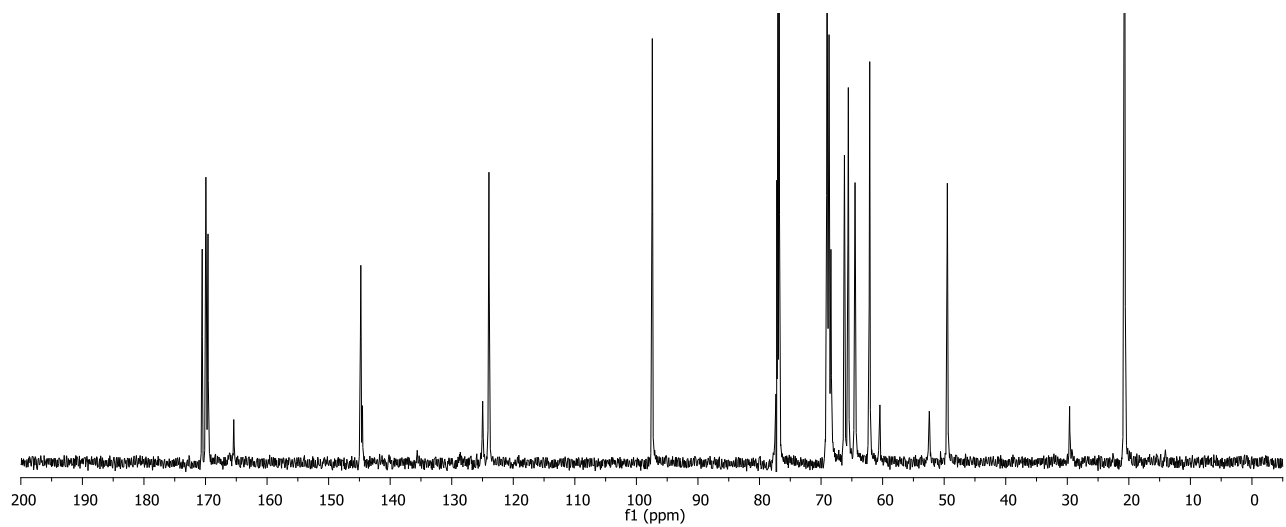

**Figure S52:**  $^{13}\text{C}$  NMR spectrum of compound **22** ( $\text{CDCl}_3$ , 150 MHz).

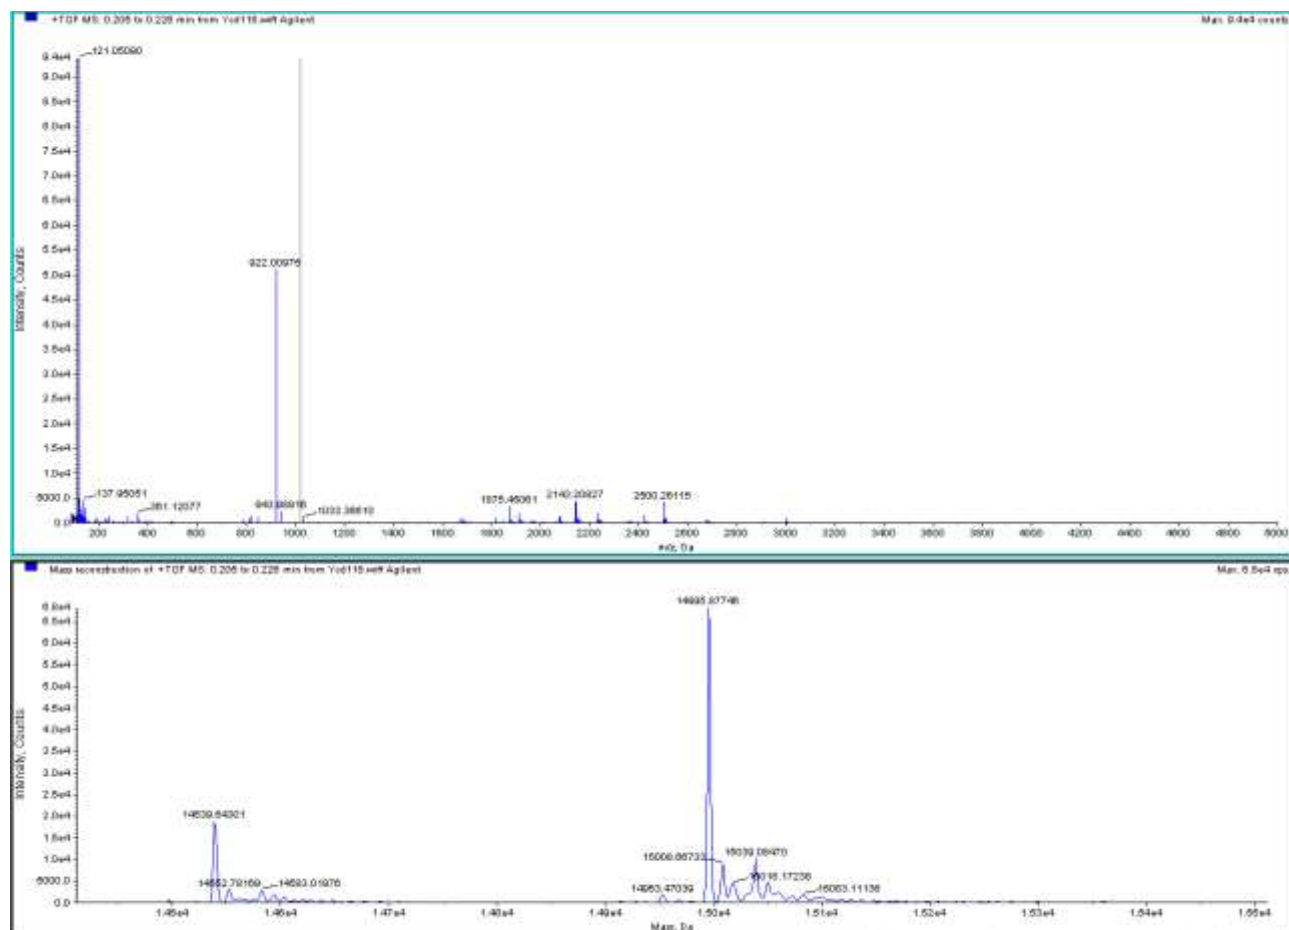

**Figure S53:** MS ( $^+\text{TOF}$ ) spectrum of compound **22**.

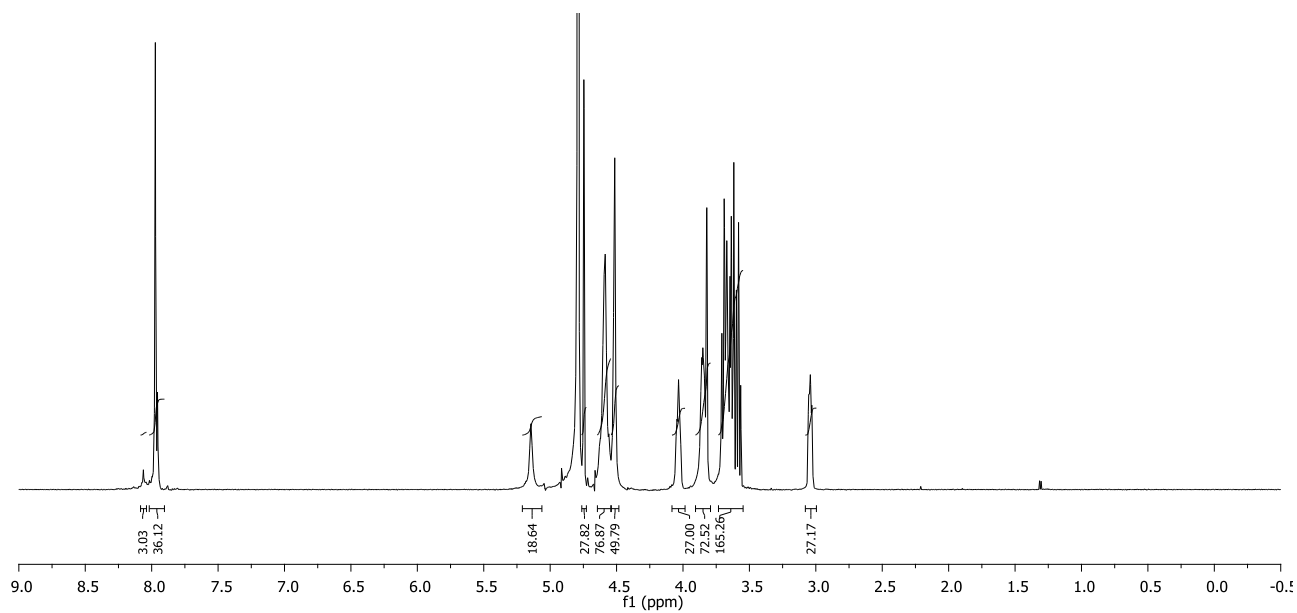

**Figure S54:**  $^1\text{H}$  NMR spectrum of compound **23** ( $\text{D}_2\text{O}$ , 600 MHz).

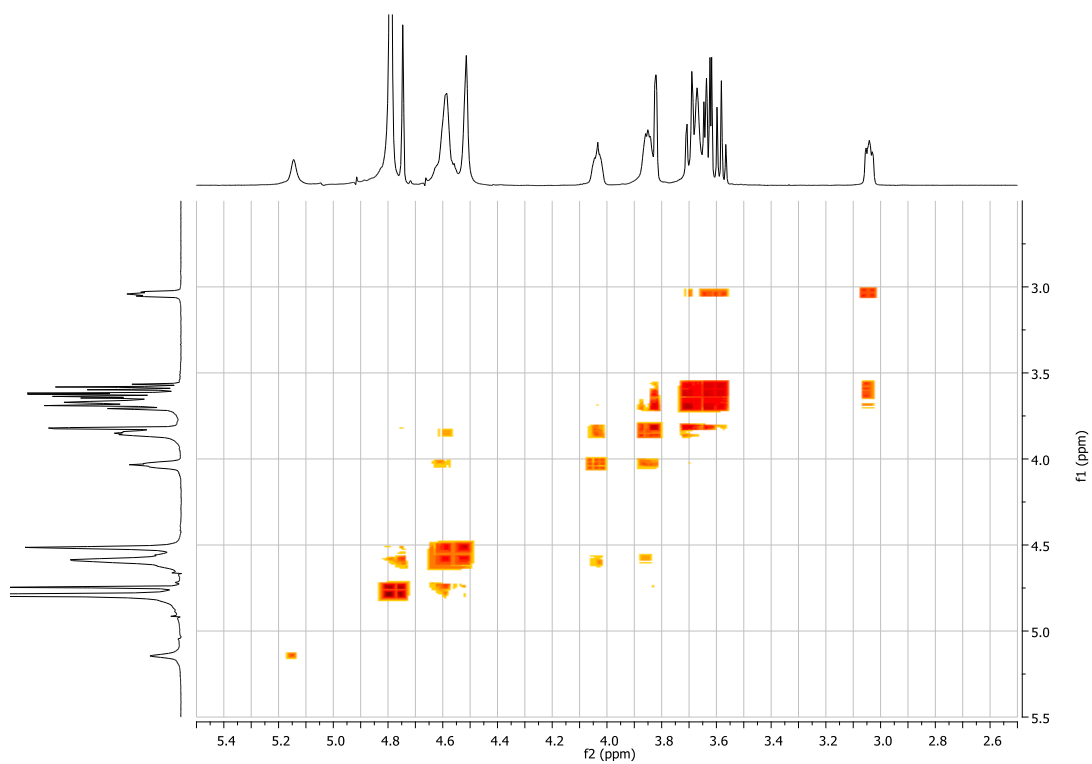

**Figure S55:** COSY spectrum of compound **23**.

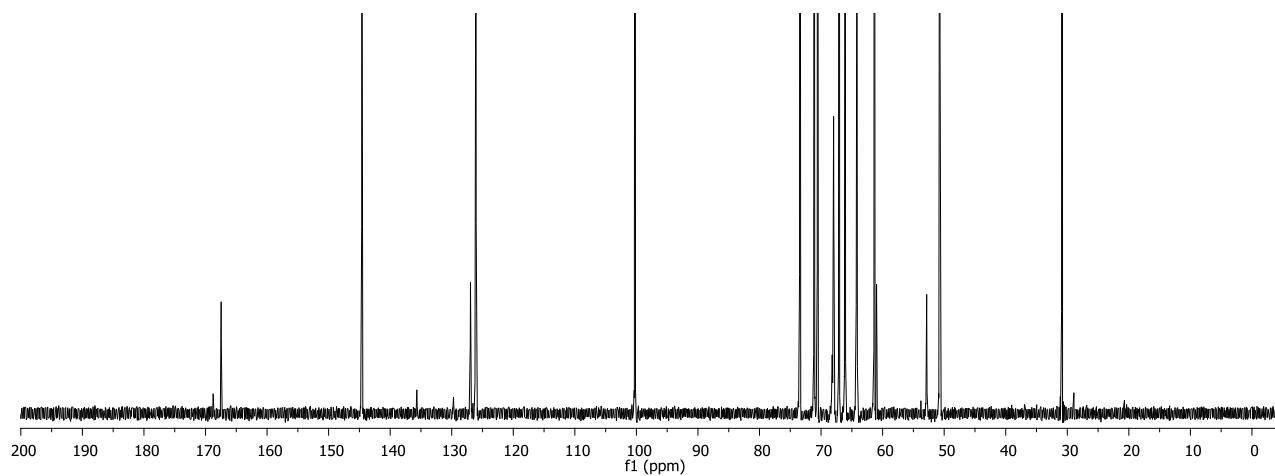

**Figure S56:**  $^{13}\text{C}$  NMR spectrum of compound **23** ( $\text{D}_2\text{O}$ , 150 MHz).

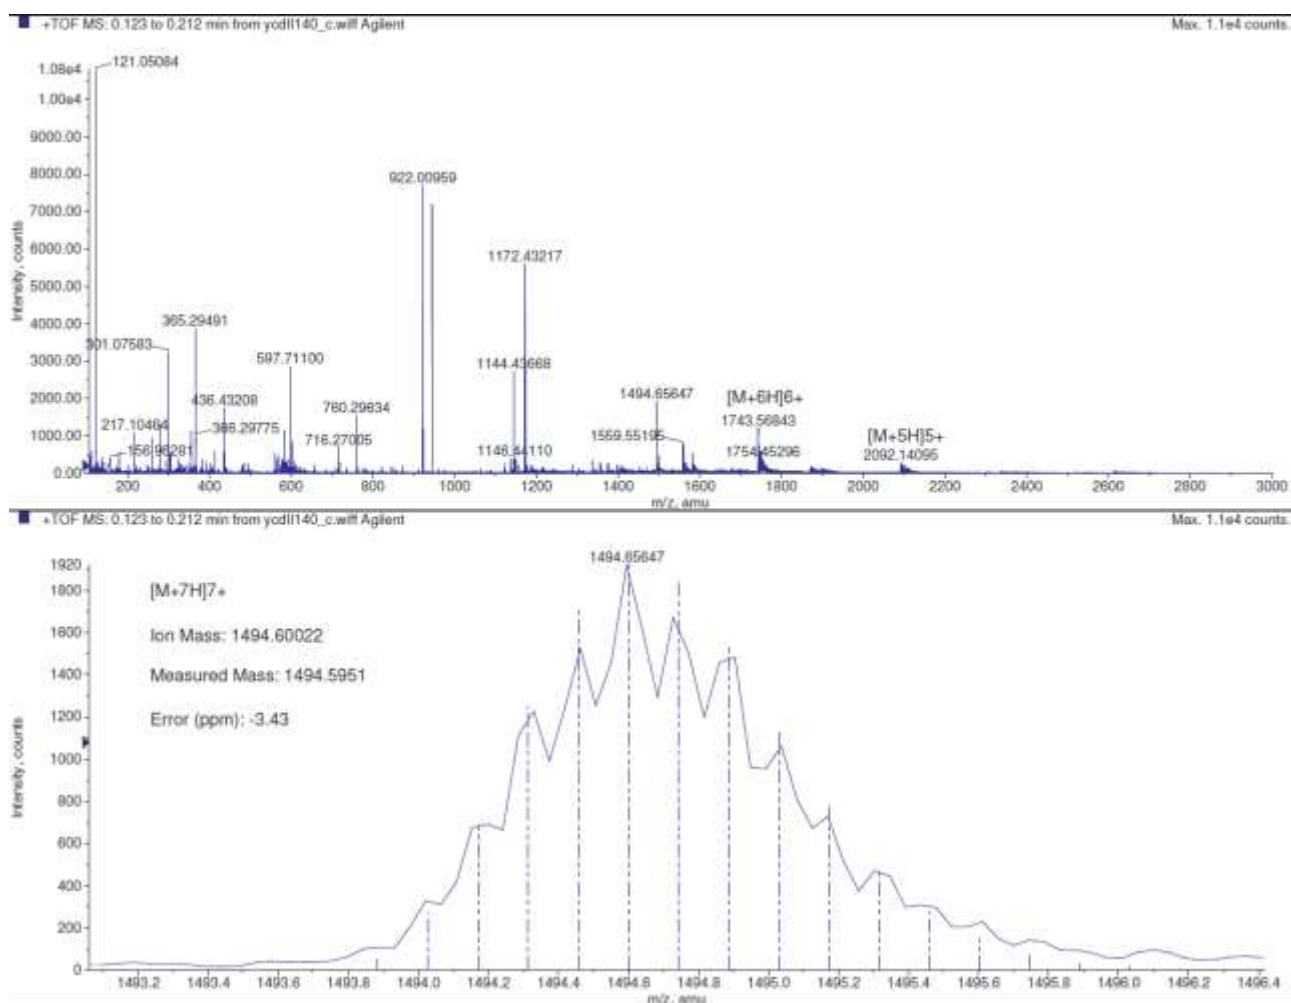

**Figure S57:** HRMS ( $^+\text{TOF}$ ) spectrum of compound **23** (+ zoom).

## NMR diffusion experiments

The measurement of the diffusion rate ( $D$ ) allows calculating the solvodynamic diameter of a molecule.<sup>1</sup>

The dendrimers are considered as spherical molecular objects, and characterized by an apparent diffusion coefficient  $D$ . The application of the Stokes-Einstein equation gives an estimate of the diameter of the molecule.

Stokes–Einstein equation:

$$D = K_B T / 6\pi\eta r_s$$

$D$ : Diffusion rate ( $\text{m}^2 \cdot \text{s}^{-1}$ );  $K_B$ : Boltzmann's constant ( $k_B = 1.38 \times 10^{-23} \text{ m}^2 \cdot \text{kg} \cdot \text{s}^{-2} \cdot \text{K}^{-1}$ );  $T$ : Temperature (K) ( $T = 298.15 \text{ K}$ );  $\eta$ : solvent viscosity in Pa s;  $r_s$ : Solvodynamic radius of the species.

---

<sup>1</sup> Diaz, M. D.; Berger, S. *Carbohydr. Res.* **2000**, 329, 1–5.
